# Supplementary material for: Smoking, alcohol consumption and disease-specific outcomes in rheumatic and musculoskeletal diseases (RMDs): systematic reviews informing the 2021 EULAR recommendations for lifestyle improvements in people with RMDs
Source: HighWire-hosted journal article supplement (doi:10.1136/rmdopen-2021-002170), 2022-03-01
Supplement: rmdopen-2021-002170supp001_data_supplement.pdf [file rmdopen-2021-002170supp001_data_supplement.pdf]

## Supplementary file

|                                                                                                                                 |    |
|---------------------------------------------------------------------------------------------------------------------------------|----|
| Figure S1. Flow chart of the selection of existing reviews and meta-analyses included in the systematic review .....            | 3  |
| Figure S2. Flow chart of the selection of existing reviews and meta-analyses on alcohol included in the systematic review ..... | 4  |
| Figure S3. Flow chart of the selection of individual studies on smoking included in the systematic review .....                 | 5  |
| Figure S4. Flow chart of the selection of individual studies on alcohol included in the systematic review .....                 | 6  |
| Supplementary table 1 – Search strategy for systematic review of published reviews and meta-analyses .....                      | 7  |
| Supplementary table 2 – Search strategy for systematic review of original articles focusing on smoking in RMDs .....            | 11 |
| Supplementary table 3 – Search strategy to identify published systematic reviews and meta-analyses on alcohol .....             | 14 |
| Supplementary table 4 – Search strategy for systematic review of original articles focusing on alcohol in RMDs .....            | 16 |
| Supplementary table 5 – Included outcomes and examples of measures used to assess these outcomes .....                          | 19 |
| Supplementary table 6 – Oxford Centre for Evidence-Based Medicine Levels of Evidence.....                                       | 22 |
| Supplementary table 7 – Osteoarthritis and smoking: evidence from meta-analyses and systematic reviews .....                    | 23 |
| Supplementary table 8 – Osteoarthritis and smoking: evidence from individual studies.....                                       | 24 |
| Supplementary table 9 – Osteoarthritis and smoking: methodological quality of individual studies ...                            | 25 |
| Supplementary table 10 – Rheumatoid arthritis and smoking: evidence form meta-analyses and systematic reviews.....              | 26 |
| Supplementary table 11 – Early rheumatoid arthritis and smoking: evidence from individual studies                               | 27 |
| Supplementary table 12 – Early rheumatoid arthritis and smoking: methodological quality of individual studies.....              | 32 |
| Supplementary table 13 – Rheumatoid arthritis and smoking: evidence from individual studies .....                               | 33 |
| Supplementary table 14 – Rheumatoid arthritis and smoking: methodological quality of individual studies.....                    | 43 |
| Supplementary table 15 – Systemic lupus erythematosus and smoking: evidence from systematic reviews .....                       | 44 |
| Supplementary table 16 – Systemic lupus erythematosus and smoking: evidence from individual studies.....                        | 45 |
| Supplementary table 17 – Systemic lupus erythematosus and smoking: methodological quality of individual studies.....            | 51 |
| Supplementary table 18 – Axial spondyloarthritis and smoking: evidence from systematic reviews...                               | 52 |

|                                                                                                                      |    |
|----------------------------------------------------------------------------------------------------------------------|----|
| Supplementary table 19 – Axial spondyloarthritis and smoking – evidence from individual studies...                   | 53 |
| Supplementary table 20 – Axial spondyloarthritis and smoking: methodological quality of individual studies.....      | 55 |
| Supplementary table 21 – Psoriatic arthritis and smoking: evidence from individual studies .....                     | 56 |
| Supplementary table 22 – Psoriatic arthritis and smoking: methodological quality of individual studies .....         | 57 |
| Supplementary table 23 – Systemic sclerosis and smoking: evidence from individual studies .....                      | 58 |
| Supplementary table 24 – Systemic sclerosis and smoking: methodological quality of individual studies.....           | 59 |
| Supplementary table 25 – Gout and smoking: evidence from individual studies .....                                    | 60 |
| Supplementary table 26 – Gout and smoking: Methodological quality of individual studies.....                         | 61 |
| Supplementary table 27 – Summary of cut-offs used for alcohol exposure in the individual studies...                  | 62 |
| Supplementary table 28 – RMDs and alcohol: summary of evidence from systematic review .....                          | 63 |
| Supplementary table 29 – Rheumatoid arthritis and alcohol: evidence from individual studies .....                    | 64 |
| Supplementary table 30 – Rheumatoid arthritis and alcohol: methodological quality of individual studies.....         | 69 |
| Supplementary table 31 – Systemic lupus erythematosus and alcohol: evidence from individual studies .....            | 70 |
| Supplementary table 32 – Systemic lupus erythematosus and alcohol: methodological quality of individual studies..... | 71 |
| Supplementary table 33 – Gout and alcohol: evidence from individual studies .....                                    | 72 |
| Supplementary table 34 – Gout and alcohol: methodological quality of individual studies .....                        | 75 |
| Supplementary table 35 – PRISMA 2020 Checklist .....                                                                 | 76 |
| References .....                                                                                                     | 79 |

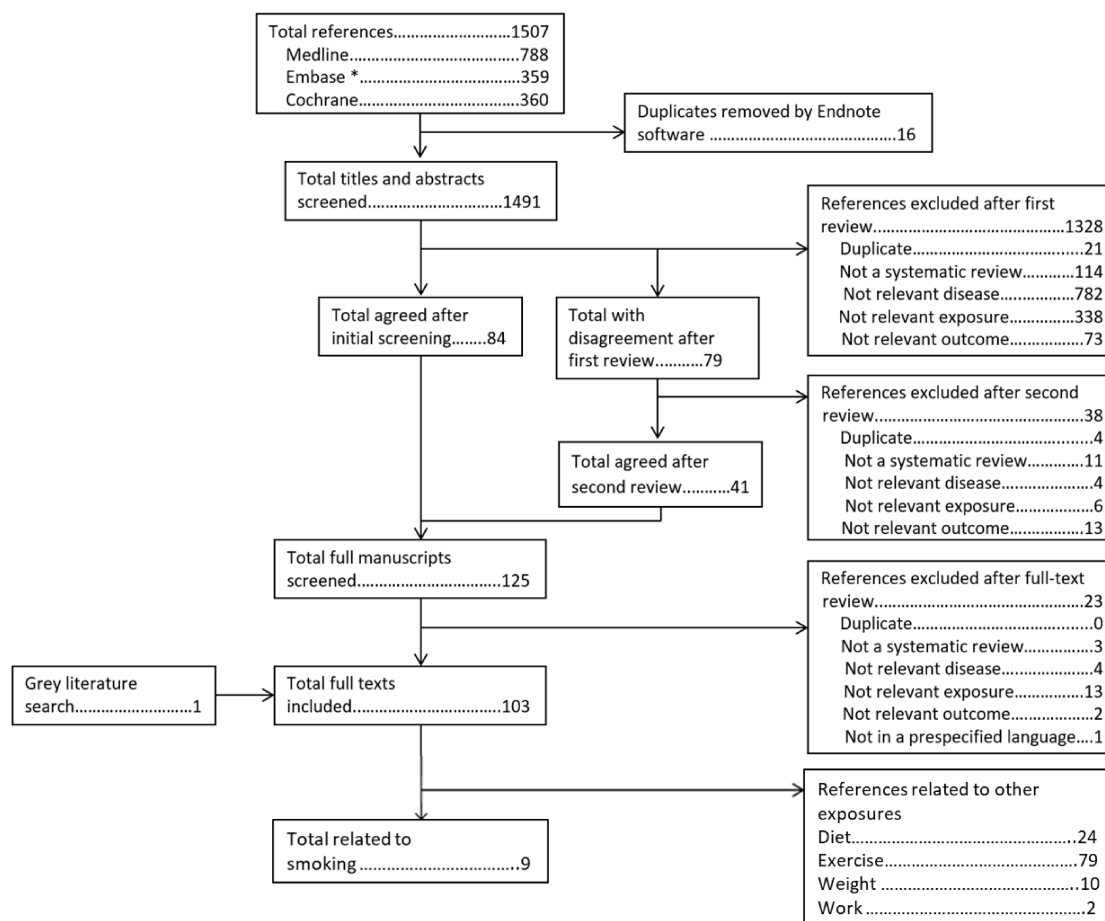

**Figure S1. Flow chart of the selection of existing reviews and meta-analyses included in the systematic review**

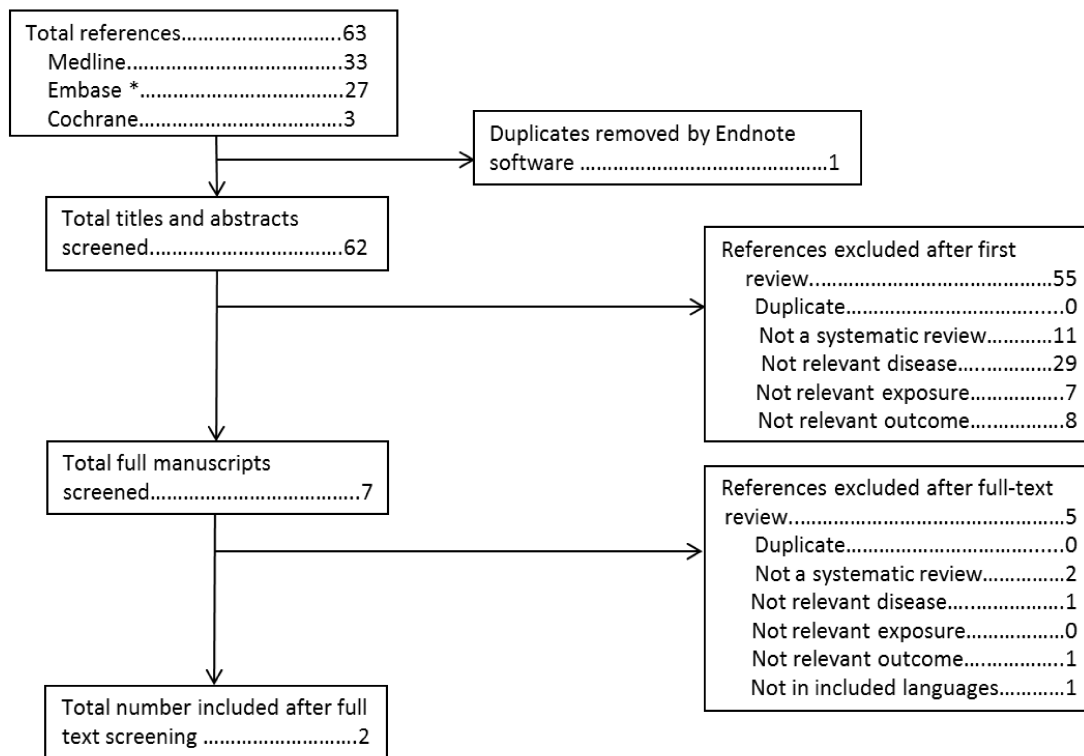

**Figure S2. Flow chart of the selection of existing reviews and meta-analyses on alcohol included in the systematic review**

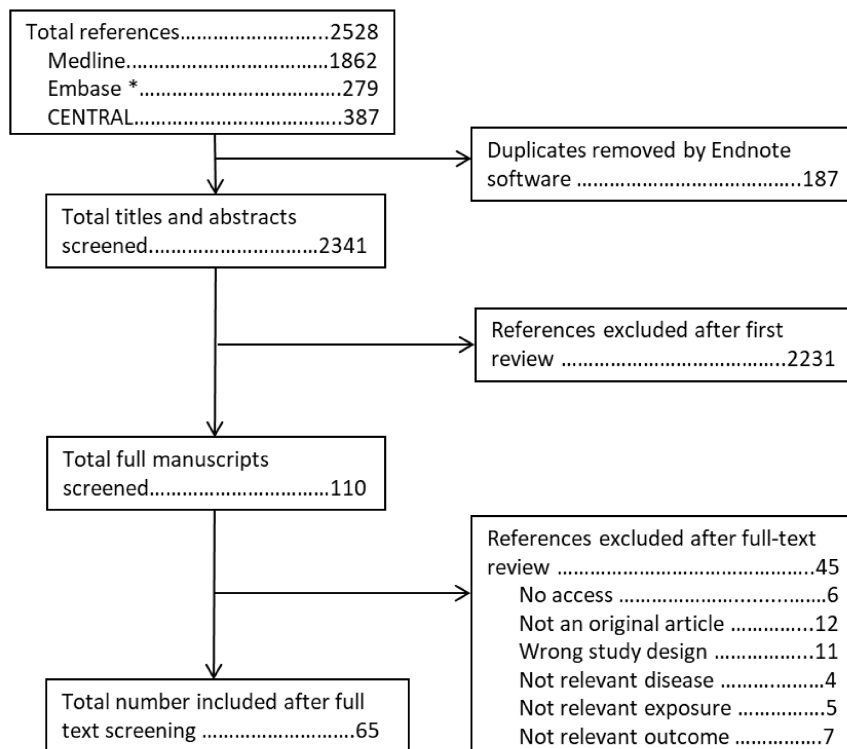

**Figure S3. Flow chart of the selection of individual studies on smoking included in the systematic review**

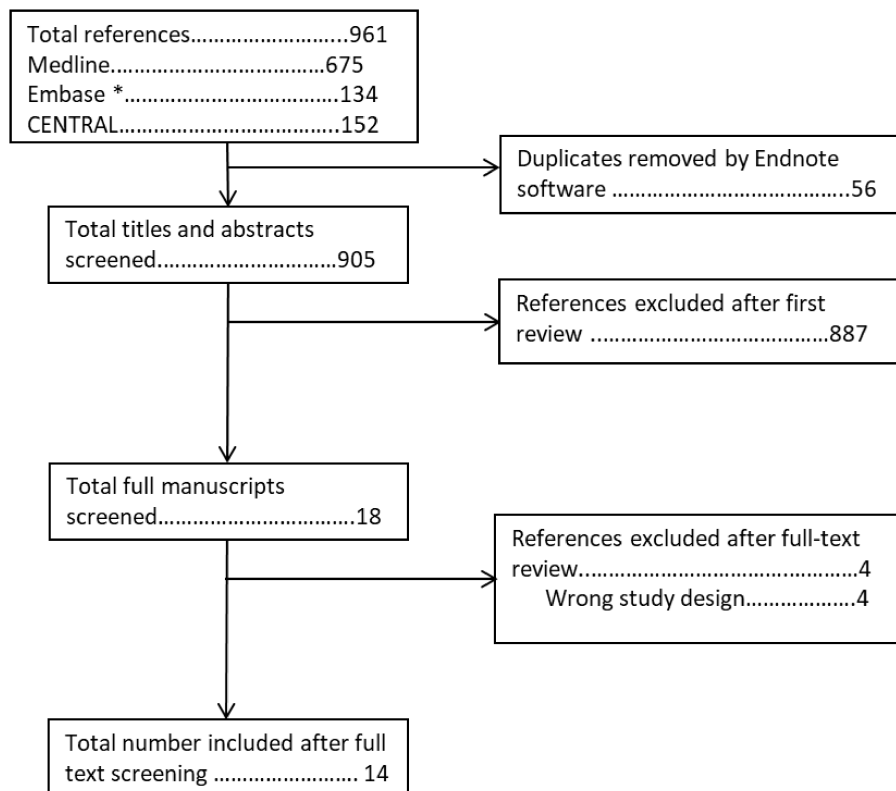

**Figure S4. Flow chart of the selection of individual studies on alcohol included in the systematic review**

**Supplementary table 1 – Search strategy for systematic review of published reviews and meta-analyses**

| Category | Term                                                                                                                                                                                                                                                                                                                                                                                                                                                                                                                                                                                                                                                                                                                                                                                                                                                                                                                                                                                                                                                                                                                                                                                                                                                                                                                                                                                                                                                                                                                                                                                                                                                                                                                                                                                                                                                                                                                                                                                                                                                                                        |
|----------|---------------------------------------------------------------------------------------------------------------------------------------------------------------------------------------------------------------------------------------------------------------------------------------------------------------------------------------------------------------------------------------------------------------------------------------------------------------------------------------------------------------------------------------------------------------------------------------------------------------------------------------------------------------------------------------------------------------------------------------------------------------------------------------------------------------------------------------------------------------------------------------------------------------------------------------------------------------------------------------------------------------------------------------------------------------------------------------------------------------------------------------------------------------------------------------------------------------------------------------------------------------------------------------------------------------------------------------------------------------------------------------------------------------------------------------------------------------------------------------------------------------------------------------------------------------------------------------------------------------------------------------------------------------------------------------------------------------------------------------------------------------------------------------------------------------------------------------------------------------------------------------------------------------------------------------------------------------------------------------------------------------------------------------------------------------------------------------------|
| Diseases | <ol style="list-style-type: none"> <li>1. Arthritis, Rheumatoid (mesh) (exp) (include all subheadings)</li> <li>2. Inflammatory \$arthritis</li> <li>3. Undifferentiated arthritis</li> <li>4. RA</li> <li>5. Atrophic arthritis</li> <li>6. Proliferative arthritis</li> <li>7. Osteoarth\$</li> <li>8. Arthrosis</li> <li>9. Degenerative joint disease</li> <li>10. Hypertrophic arthritis</li> <li>11. Arthropathy</li> <li>12. Polyarthritis</li> <li>13. OA</li> <li>14. Arthritis psoriatica</li> <li>15. Arthropathic psoriasis</li> <li>16. Psoriatic arthropathy</li> <li>17. Arthritis, Psoriatic (mesh) (exp) (include all subheadings)</li> <li>18. Psoria\$ arthriti\$ [have to uncheck “map team to subject heading”]</li> <li>19. Psoria\$ arthropath\$ [have to uncheck “map team to subject heading”]</li> <li>20. Undifferentiated oligoarthritis</li> <li>21. Arthritic psoriasis</li> <li>22. PsA</li> <li>23. Ankylosing spondylitis (mesh) (exp) (include all subheadings)</li> <li>24. Ankylosi\$</li> <li>25. Spondyloarthr\$ [have to uncheck “map team to subject heading”]</li> <li>26. Spondylarthr\$ [have to uncheck “map team to subject heading”]</li> <li>27. Spondylitis (mesh) (exp) (include all subheadings)</li> <li>28. Bechtere\$ [have to uncheck “map team to subject heading”]</li> <li>29. Marie-Strumpell</li> <li>30. Spinal arthritis</li> <li>31. Lupus erythematosus, systemic (mesh) (exp) (include all subheadings)</li> <li>32. systemic lupus erythematosus</li> <li>33. SLE</li> <li>34. Libman-Sacks disease</li> <li>35. Libman Sacks disease</li> <li>36. Lupus erythematosus disseminatus</li> <li>37. Disseminated lupus erythematosus</li> <li>38. Lupus syndrome</li> <li>39. Scleroderma, Systemic (mesh) (exp) (include all subheadings)</li> <li>40. SSc</li> <li><del>41. Scleros\$ (removed because of ALS, multiple sclerosis etc.)</del></li> <li>42. Thibierge-Weissenbach syndrome</li> <li>43. Morphea</li> <li>44. Gout (mesh) (exp) (include all subheadings)</li> <li>45. Gout\$</li> <li>46. Podagra</li> </ol> |

|                      |                                                                                                                                                                                                                                                                                                                                                                                                                                                                                                                                                                                                                                                                                                                                                                                                                                                                                                                                                                                                                                                                                                                                                                                                                                                                                                                                                                                                                                                                                                                                                    |
|----------------------|----------------------------------------------------------------------------------------------------------------------------------------------------------------------------------------------------------------------------------------------------------------------------------------------------------------------------------------------------------------------------------------------------------------------------------------------------------------------------------------------------------------------------------------------------------------------------------------------------------------------------------------------------------------------------------------------------------------------------------------------------------------------------------------------------------------------------------------------------------------------------------------------------------------------------------------------------------------------------------------------------------------------------------------------------------------------------------------------------------------------------------------------------------------------------------------------------------------------------------------------------------------------------------------------------------------------------------------------------------------------------------------------------------------------------------------------------------------------------------------------------------------------------------------------------|
|                      | <p>47. Tophus<br/> 48. Tophi<br/> 49. Tophaceous<br/> 50. Urate<br/> 51. Uric acid<br/> 52. Hyperurecemi\$ [have to uncheck "map team to subject heading"]<br/> 53. Hyperurecaemi\$ [have to uncheck "map team to subject heading"]<br/> 54. Hyperuricemia\$<br/> 55. Hyperuricaemi\$ [have to uncheck "map team to subject heading"]<br/> 56. arthritis urica<br/> 57. Gout acute</p>                                                                                                                                                                                                                                                                                                                                                                                                                                                                                                                                                                                                                                                                                                                                                                                                                                                                                                                                                                                                                                                                                                                                                             |
| Life-style exposures | <p>58. Diet (mesh) (exp) (include all subheadings)<br/> 59. Nutrition<br/> 60. Food (mesh) (exp) (include all subheadings)<br/> 61. Food habit\$<br/> 62. Nutritional status (mesh) (exp) (include all subheadings)<br/> 63. Vitamin\$ (mesh) (exp) (include all subheadings)<br/> 64. Antioxidant\$ (mesh) (exp) (include all subheadings)<br/> 65. Fatty acid\$ (mesh) (exp) (include all subheadings)<br/> 66. Carbohydrate\$ (mesh) (exp) (include all subheadings)<br/> 67. Diet\$ protein<br/> 68. Calcium<br/> 69. Fish oil\$ (mesh) (exp) (include all subheadings)<br/> 70. Fruit (mesh) (exp) (include all subheadings)<br/> 71. Vegetable\$ (mesh) (exp) (include all subheadings)<br/> 72. Micronutrient\$ (mesh) (exp) (include all subheadings)<br/> 73. Nutriment\$<br/> 74. Nutraceutical\$<br/> 75. Exercis\$<br/> 76. Strength\$<br/> 77. Endurance<br/> 78. Cardiorespiratory<br/> 79. Aerobic<br/> 80. Aerobic training<br/> 81. Exercise program\$<br/> 82. Exercise therap\$ [have to uncheck "map team to subject heading"]<br/> 83. Physical education<br/> 84. Physical training<br/> 85. Physical therapy<br/> 86. Physiotherapy<br/> 87. Muscle stretching<br/> 88. Sport (mesh) (exp) (include all subheadings)<br/> 89. Bod\$y Weight (mesh) (exp) (include all subheadings)<br/> 90. Weight change<br/> 91. Weight loss (mesh) (exp) (include all subheadings)<br/> 92. Weight reduction<br/> 93. Weight gain<br/> 94. Anti obesity<br/> 95. Anti-obesity<br/> 96. Antiobesity<br/> 97. Slimming<br/> 98. Smok\$</p> |



|                         |                                                                                                                                                                                                                                                                                                                                                                                                                                                                                                                                                                                                                                                                                                                                                                                                                                                                                                 |
|-------------------------|-------------------------------------------------------------------------------------------------------------------------------------------------------------------------------------------------------------------------------------------------------------------------------------------------------------------------------------------------------------------------------------------------------------------------------------------------------------------------------------------------------------------------------------------------------------------------------------------------------------------------------------------------------------------------------------------------------------------------------------------------------------------------------------------------------------------------------------------------------------------------------------------------|
|                         | <p>99. Smoking (mesh) (exp) (include all subheadings)<br/> 100. Tobacco (mesh) (exp) (include all subheadings)<br/> 101. Cigarette\$<br/> 102. Pipe\$<br/> 103. Cigar\$<br/> 104. Nicotine (mesh) (exp) (include all subheadings)<br/> 105. Water pipe<br/> 106. Hookah<br/> 107. Shisha<br/> 108. Paid work<br/> 109. Employment (mesh) (exp) (include all subheadings)<br/> 110. Work\$ disability<br/> 111. Productivity<br/> 112. Employability<br/> 113. Work\$ ability<br/> 114. Absenteeism (mesh) (exp) (include all subheadings)<br/> 115. Sick leave (mesh) (exp) (include all subheadings)<br/> 116. Presenteeism (mesh) (exp) (include all subheadings)<br/> 117. Sick\$ absence<br/> 118. Work instability<br/> 119. Return to work (mesh) (exp) (include all subheadings)<br/> 120. Economic consequences<br/> 121. Occupational health<br/> 122. Labo\$r</p>                     |
| Systematic review terms | <p>123. Systematic adj5 review<br/> 124. Narrative review<br/> 125. Meta-analysis (mesh) (exp)<br/> 126. Meta analysis<br/> 127. Meta adj5 analysis<br/> 128. Meta-synthesis<br/> 129. Meta synthesis<br/> 130. Meta adj5 synthesis<br/> 131. Literature review<br/> 132. Literature search<br/> 133. Meta-narrative review<br/> 134. Meta narrative review</p>                                                                                                                                                                                                                                                                                                                                                                                                                                                                                                                                 |
| Combining terms         | <p>135. RA – 1 OR 2 OR 3 OR 4 OR 5 OR 6<br/> 136. OA – 7 OR 8 OR 9 OR 10 OR 11 OR 12 OR 13<br/> 137. PSA – 14 OR 15 OR 16 OR 17 OR 18 OR 19 OR 20 OR 21 OR 22<br/> 138. AS – 23 OR 24 OR 25 OR 26 OR 27 OR 28 OR 29 OR 30<br/> 139. SLE – 31 OR 32 OR 33 OR 34 OR 35 OR 36 OR 37 OR 38<br/> 140. SSc – 39 OR 40 OR 41 OR 42 OR 43<br/> 141. Gout – 44 OR 45 OR 46 OR 47 OR 48 OR 49 OR 50 OR 51 OR 52 OR 53 OR 54 OR 55 OR 56 OR 57<br/> 142. Diseases – 136 OR 137 OR 138 OR 139 OR 140 OR 141 OR 142<br/> 143. Diet – 58 OR 59 OR 60 OR 61 OR 62 OR 63 OR 64 OR 65 OR 66 OR 67 OR 68 OR 69 OR 70 OR 71 OR 72 OR 73 OR 74<br/> 144. Exercise – 75 OR 76 OR 77 OR 78 OR 79 OR 80 OR 81 OR 82 OR 83 OR 84 OR 85 OR 86 OR 87 OR 88<br/> 145. Weight – 89 OR 90 OR 91 OR 92 OR 93 OR 94 OR 95 OR 96 OR 97<br/> 146. Smoking - 98 OR 99 OR 100 OR 101 OR 102 OR 103 OR 104 OR 105 OR 106 OR 107</p> |

|  |                                                                                                                                                                                                                                                                                                                                                |
|--|------------------------------------------------------------------------------------------------------------------------------------------------------------------------------------------------------------------------------------------------------------------------------------------------------------------------------------------------|
|  | <p>147. Work – 108 OR 109 OR 110 OR 111 OR 112 OR 113 OR 114 OR 115 OR 116 OR 117 OR 118 OR 119 OR 120 OR 121 OR 122</p> <p>148. Exposures – 144 OR 145 OR 146 OR 147 OR 148</p> <p>149. Systematic review terms - 123 OR 124 OR 125 OR 126 OR 127 OR 128 OR 129 OR 130 OR 131 OR 132 OR 133 OR 134 OR 135</p> <p>150. 143 AND 149 AND 150</p> |
|--|------------------------------------------------------------------------------------------------------------------------------------------------------------------------------------------------------------------------------------------------------------------------------------------------------------------------------------------------|

**Supplementary table 2 – Search strategy for systematic review of original articles focusing on smoking in RMDs**

| Category | Term                                                                                                                                                                                                                                                                                                                                                                                                                                                                                                                                                                                                                                                                                                                                                                                                                                                                                                                                                                                                                                                                                                                                                                                                                                                                                                                                                                                                                                                                                                                                                                                                                                                                                                                                                                                                                     |
|----------|--------------------------------------------------------------------------------------------------------------------------------------------------------------------------------------------------------------------------------------------------------------------------------------------------------------------------------------------------------------------------------------------------------------------------------------------------------------------------------------------------------------------------------------------------------------------------------------------------------------------------------------------------------------------------------------------------------------------------------------------------------------------------------------------------------------------------------------------------------------------------------------------------------------------------------------------------------------------------------------------------------------------------------------------------------------------------------------------------------------------------------------------------------------------------------------------------------------------------------------------------------------------------------------------------------------------------------------------------------------------------------------------------------------------------------------------------------------------------------------------------------------------------------------------------------------------------------------------------------------------------------------------------------------------------------------------------------------------------------------------------------------------------------------------------------------------------|
| Disease  | <ol style="list-style-type: none"> <li>1. Arthritis, Rheumatoid (mesh) (exp) (include all subheadings)</li> <li>2. Inflammatory arthritis</li> <li>3. Undifferentiated arthritis</li> <li>4. RA</li> <li>5. Atrophic arthritis</li> <li>6. Proliferative arthritis</li> <li>7. Osteoarthritis</li> <li>8. Arthrosis</li> <li>9. Degenerative joint disease</li> <li>10. Hypertrophic arthritis</li> <li>11. Arthropathy</li> <li>12. Polyarthritis</li> <li>13. OA</li> <li>14. Arthritis psoriatica</li> <li>15. Arthropathic psoriasis</li> <li>16. Psoriatic arthropathy</li> <li>17. Arthritis, Psoriatic (mesh) (exp) (include all subheadings)</li> <li>18. Psoriasis arthritis [have to uncheck “map term to subject heading”]</li> <li>19. Psoriasis arthropathy [have to uncheck “map term to subject heading”]</li> <li>20. Undifferentiated oligoarthritis</li> <li>21. Arthritic psoriasis</li> <li>22. PsA</li> <li>23. Ankylosing spondylitis (mesh) (exp) (include all subheadings)</li> <li>24. Ankylositis</li> <li>25. Spondyloarthritis [have to uncheck “map term to subject heading”]</li> <li>26. Spondylarthritis [have to uncheck “map term to subject heading”]</li> <li>27. Spondylitis (mesh) (exp) (include all subheadings)</li> <li>28. Bechterew [have to uncheck “map term to subject heading”]</li> <li>29. Marie-Strumpell</li> <li>30. Spinal arthritis</li> <li>31. Lupus erythematosus, systemic (mesh) (exp) (include all subheadings)</li> <li>32. systemic lupus erythematosus</li> <li>33. SLE</li> <li>34. Libman-Sacks disease</li> <li>35. Libman Sacks disease</li> <li>36. Lupus erythematosus disseminatus</li> <li>37. Disseminated lupus erythematosus</li> <li>38. Lupus syndrome</li> <li>39. Scleroderma, Systemic (mesh) (exp) (include all subheadings)</li> </ol> |

|                   |                                                                                                                                                                                                                                                                                                                                                                                                                                                                                                                                                                                    |
|-------------------|------------------------------------------------------------------------------------------------------------------------------------------------------------------------------------------------------------------------------------------------------------------------------------------------------------------------------------------------------------------------------------------------------------------------------------------------------------------------------------------------------------------------------------------------------------------------------------|
|                   | <p>40. SSc</p> <p>41. Thibierge-Weissenbach syndrome</p> <p>42. Morphea</p> <p>43. Gout (mesh) (exp) (include all subheadings)</p> <p>44. Gout\$</p> <p>45. Podagra</p> <p>46. Tophus</p> <p>47. Tophi</p> <p>48. Tophaceous</p> <p>49. Hyperurecemi\$ [have to uncheck "map team to subject heading"]</p> <p>50. Hyperurecaemi\$ [have to uncheck "map team to subject heading"]</p> <p>51. Hyperuricemia\$</p> <p>52. Hyperuricaemi\$ [have to uncheck "map team to subject heading"]</p> <p>53. arthritis urica</p> <p>54. Gout acute</p> <p>55. Inflammatory joint disease</p> |
| <i>Exposure</i>   | <p>56. Smok\$</p> <p>57. Smoking (mesh) (exp) (include all subheadings)</p> <p>58. Tobacco (mesh) (exp) (include all subheadings)</p> <p>59. Cigarette\$</p> <p>60. Pipe\$</p> <p>61. Cigar\$</p> <p>62. Nicotine (mesh) (exp) (include all subheadings)</p> <p>63. Water pipe</p> <p>64. Hookah</p> <p>65. Shisha</p> <p>66. E-cigarette</p> <p>67. vaping</p>                                                                                                                                                                                                                    |
| <i>Exclusions</i> | <p>68. Cross-sectional</p> <p>69. Cross sectional</p> <p>70. Children</p> <p>71. Child</p> <p>72. Juvenile</p> <p>73. Adolescent</p> <p>74. Teenager</p> <p>75. Animal</p> <p>76. Rat</p> <p>77. rats</p> <p>78. Mouse</p> <p>79. Case study</p> <p>80. Case series</p> <p>81. Systematic adj5 review</p> <p>82. Narrative review</p> <p>83. Meta-analysis (mesh) (exp)</p> <p>84. Meta analysis</p>                                                                                                                                                                               |

|                 |                                                                                                                                                                                                                                                                                                                                                                                                                                                                                                                                                                                                                                                                                                                                                                                                                     |
|-----------------|---------------------------------------------------------------------------------------------------------------------------------------------------------------------------------------------------------------------------------------------------------------------------------------------------------------------------------------------------------------------------------------------------------------------------------------------------------------------------------------------------------------------------------------------------------------------------------------------------------------------------------------------------------------------------------------------------------------------------------------------------------------------------------------------------------------------|
|                 | <p>85. Meta adj5 analysis</p> <p>86. Meta-synthesis</p> <p>87. Meta synthesis</p> <p>88. Meta adj5 synthesis</p> <p>89. Literature review</p> <p>90. Literature search</p> <p>91. Meta-narrative review</p> <p>92. Meta narrative review</p>                                                                                                                                                                                                                                                                                                                                                                                                                                                                                                                                                                        |
| Combining terms | <p>93. RA – 1 OR 2 OR 3 OR 4 OR 5 OR 6</p> <p>94. OA – 7 OR 8 OR 9 OR 10 OR 11 OR 12 OR 13</p> <p>95. PSA – 14 OR 15 OR 16 OR 17 OR 18 OR 19 OR 20 OR 21 OR 22</p> <p>96. AS – 23 OR 24 OR 25 OR 26 OR 27 OR 28 OR 29 OR 30</p> <p>97. SLE – 31 OR 32 OR 33 OR 34 OR 35 OR 36 OR 37 OR 38</p> <p>98. SSc – 39 OR 40 OR 41 OR 42</p> <p>99. Gout – 43 OR 44 OR 45 OR 46 OR 47 OR 48 OR 49 OR 50 OR 51 OR 52 OR 53 OR 54 OR 55 OR 56</p> <p>100. Diseases – 92 OR 93 OR 94 OR 95 OR 96 OR 97 OR 98</p> <p>101. Smoking – 57 OR 58 OR 59 OR 60 OR 61 OR 62 OR 63 OR 64 OR 65 OR 66 OR 67</p> <p>102. Exclusions –68 OR 69 OR 70 OR 71 OR 72 OR 73 OR 74 OR 75 OR 76 OR 77 OR 78 OR 79 OR 80 OR 81 OR 82 OR 83 OR 84 OR 85 OR 86 OR 87 OR 88 OR 89 OR 90 OR 91 OR 92</p> <p>103. 99 AND 100</p> <p>104. 102 NOT 101</p> |

### Supplementary table 3 – Search strategy to identify published systematic reviews and meta-analyses on alcohol

The results from the first review of published systematic reviews and meta-analyses (supplementary table 1) were presented at a teleconference in January 2019. At this teleconference, it was decided to add alcohol as an exposure of interest for this taskforce. This led to a second systematic review of published reviews and meta-analyses.

| Category | Term                                                                                                                                                                                                                                                                                                                                                                                                                                                                                                                                                                                                                                                                                                                                                                                                                                                                                                                                                                                                                                                                                                                                                                                                                                                                                                                                                                                                                                                                                                                                                                                                                                                                                                                                                                                                                                                                                                                                                              |
|----------|-------------------------------------------------------------------------------------------------------------------------------------------------------------------------------------------------------------------------------------------------------------------------------------------------------------------------------------------------------------------------------------------------------------------------------------------------------------------------------------------------------------------------------------------------------------------------------------------------------------------------------------------------------------------------------------------------------------------------------------------------------------------------------------------------------------------------------------------------------------------------------------------------------------------------------------------------------------------------------------------------------------------------------------------------------------------------------------------------------------------------------------------------------------------------------------------------------------------------------------------------------------------------------------------------------------------------------------------------------------------------------------------------------------------------------------------------------------------------------------------------------------------------------------------------------------------------------------------------------------------------------------------------------------------------------------------------------------------------------------------------------------------------------------------------------------------------------------------------------------------------------------------------------------------------------------------------------------------|
| Disease  | <ol style="list-style-type: none"> <li>1. Arthritis, Rheumatoid (mesh) (exp) (include all subheadings)</li> <li>2. Inflammatory arthritis</li> <li>3. Undifferentiated arthritis</li> <li>4. RA</li> <li>5. Atrophic arthritis</li> <li>6. Proliferative arthritis</li> <li>7. Osteoarthritis</li> <li>8. Arthrosis</li> <li>9. Degenerative joint disease</li> <li>10. Hypertrophic arthritis</li> <li>11. Arthropathy</li> <li>12. Polyarthritis</li> <li>13. OA</li> <li>14. Arthritis psoriatica</li> <li>15. Arthropathic psoriasis</li> <li>16. Psoriatic arthropathy</li> <li>17. Arthritis, Psoriatic (mesh) (exp) (include all subheadings)</li> <li>18. Psoriasis arthritis [have to uncheck "map term to subject heading"]</li> <li>19. Psoriasis arthropathy [have to uncheck "map term to subject heading"]</li> <li>20. Undifferentiated oligoarthritis</li> <li>21. Arthritic psoriasis</li> <li>22. PsA</li> <li>23. Ankylosing spondylitis (mesh) (exp) (include all subheadings)</li> <li>24. Ankylosis</li> <li>25. Spondyloarthritis [have to uncheck "map term to subject heading"]</li> <li>26. Spondylarthritis [have to uncheck "map term to subject heading"]</li> <li>27. Spondylitis (mesh) (exp) (include all subheadings)</li> <li>28. Bechterew [have to uncheck "map term to subject heading"]</li> <li>29. Marie-Strumpell</li> <li>30. Spinal arthritis</li> <li>31. Lupus erythematosus, systemic (mesh) (exp) (include all subheadings)</li> <li>32. systemic lupus erythematosus</li> <li>33. SLE</li> <li>34. Libman-Sacks disease</li> <li>35. Libman Sacks disease</li> <li>36. Lupus erythematosus disseminatus</li> <li>37. Disseminated lupus erythematosus</li> <li>38. Lupus syndrome</li> <li>39. Scleroderma, Systemic (mesh) (exp) (include all subheadings)</li> <li>40. SSc</li> <li>41. Thibierge-Weissenbach syndrome</li> <li>42. Morphea</li> <li>43. Gout (mesh) (exp) (include all subheadings)</li> </ol> |

|                                |                                                                                                                                                                                                                                                                                                                                                                                                                                                                                                                                                                                                                                                                            |
|--------------------------------|----------------------------------------------------------------------------------------------------------------------------------------------------------------------------------------------------------------------------------------------------------------------------------------------------------------------------------------------------------------------------------------------------------------------------------------------------------------------------------------------------------------------------------------------------------------------------------------------------------------------------------------------------------------------------|
|                                | <p>44. Gout\$<br/> 45. Podagra<br/> 46. Tophus<br/> 47. Tophi<br/> 48. Tophaceous<br/> 49. Urate<br/> 50. Uric acid<br/> 51. Hyperurecemi\$ [have to uncheck "map team to subject heading"]<br/> 52. Hyperurecaemi\$ [have to uncheck "map team to subject heading"]<br/> 53. Hyperuricemia\$<br/> 54. Hyperuricaemi\$ [have to uncheck "map team to subject heading"]<br/> 55. arthritis urica<br/> 56. Gout acute</p>                                                                                                                                                                                                                                                    |
| <i>Exposure</i>                | <p>57. Alcohol<br/> 58. Ethanol<br/> 59. Beer<br/> 60. Wine<br/> 61. Spirit\$<br/> 62. liquor</p>                                                                                                                                                                                                                                                                                                                                                                                                                                                                                                                                                                          |
| <i>Systematic review terms</i> | <p>63. Systematic adj5 review<br/> 64. Narrative review<br/> 65. Meta-analysis (mesh) (exp)<br/> 66. Meta analysis<br/> 67. Meta adj5 analysis<br/> 68. Meta-synthesis<br/> 69. Meta synthesis<br/> 70. Meta adj5 synthesis<br/> 71. Literature review<br/> 72. Literature search<br/> 73. Meta-narrative review<br/> 74. Meta narrative review</p>                                                                                                                                                                                                                                                                                                                        |
| <i>Combining terms</i>         | <p>75. RA – 1 OR 2 OR 3 OR 4 OR 5 OR 6<br/> 76. OA – 7 OR 8 OR 9 OR 10 OR 11 OR 12 OR 13<br/> 77. PSA – 14 OR 15 OR 16 OR 17 OR 18 OR 19 OR 20 OR 21 OR 22<br/> 78. AS – 23 OR 24 OR 25 OR 26 OR 27 OR 28 OR 29 OR 30<br/> 79. SLE – 31 OR 32 OR 33 OR 34 OR 35 OR 36 OR 37 OR 38<br/> 80. SSc – 39 OR 40 OR 41 OR 42<br/> 81. Gout – 43 OR 44 OR 45 OR 46 OR 47 OR 48 OR 49 OR 50 OR 51 OR 52 OR 53 OR 54 OR 55 OR 56<br/> 82. Alcohol – 57 OR 58 OR 59 OR 60 OR 61 OR 62<br/> 83. Systematic review terms - 63 OR 64 OR 65 OR 66 OR 67 OR 68 OR 69 OR 70 OR 71 OR 72 OR 73 OR 74<br/> 84. Disease – 75 OR 76 OR 77 OR 78 OR 79 OR 80 OR 81<br/> 85. 82 AND 83 AND 84</p> |

**Supplementary table 4 – Search strategy for systematic review of original articles focusing on alcohol in RMDs**

| Category | Term                                                                                                                                                                                                                                                                                                                                                                                                                                                                                                                                                                                                                                                                                                                                                                                                                                                                                                                                                                                                                                                                                                                                                                                                                                                                                                                                                                                                                                                                                                                                                                                                                                                                                                                                                                                                                                    |
|----------|-----------------------------------------------------------------------------------------------------------------------------------------------------------------------------------------------------------------------------------------------------------------------------------------------------------------------------------------------------------------------------------------------------------------------------------------------------------------------------------------------------------------------------------------------------------------------------------------------------------------------------------------------------------------------------------------------------------------------------------------------------------------------------------------------------------------------------------------------------------------------------------------------------------------------------------------------------------------------------------------------------------------------------------------------------------------------------------------------------------------------------------------------------------------------------------------------------------------------------------------------------------------------------------------------------------------------------------------------------------------------------------------------------------------------------------------------------------------------------------------------------------------------------------------------------------------------------------------------------------------------------------------------------------------------------------------------------------------------------------------------------------------------------------------------------------------------------------------|
| Disease  | <ol style="list-style-type: none"> <li>1. Arthritis, Rheumatoid (mesh) (exp) (include all subheadings)</li> <li>2. Inflammatory arthritis</li> <li>3. Undifferentiated arthritis</li> <li>4. RA</li> <li>5. Atrophic arthritis</li> <li>6. Proliferative arthritis</li> <li>7. Osteoarthritis</li> <li>8. Arthrosis</li> <li>9. Degenerative joint disease</li> <li>10. Hypertrophic arthritis</li> <li>11. Arthropathy</li> <li>12. Polyarthritis</li> <li>13. OA</li> <li>14. Arthritis psoriatica</li> <li>15. Arthropathic psoriasis</li> <li>16. Psoriatic arthropathy</li> <li>17. Arthritis, Psoriatic (mesh) (exp) (include all subheadings)</li> <li>18. Psoriasis arthritis [have to uncheck “map term to subject heading”]</li> <li>19. Psoriasis arthropathy [have to uncheck “map term to subject heading”]</li> <li>20. Undifferentiated oligoarthritis</li> <li>21. Arthritic psoriasis</li> <li>22. PsA</li> <li>23. Ankylosing spondylitis (mesh) (exp) (include all subheadings)</li> <li>24. Ankylosis</li> <li>25. Spondyloarthritis [have to uncheck “map term to subject heading”]</li> <li>26. Spondylarthritis [have to uncheck “map term to subject heading”]</li> <li>27. Spondylitis (mesh) (exp) (include all subheadings)</li> <li>28. Bechterew [have to uncheck “map term to subject heading”]</li> <li>29. Marie-Strumpell</li> <li>30. Spinal arthritis</li> <li>31. Lupus erythematosus, systemic (mesh) (exp) (include all subheadings)</li> <li>32. systemic lupus erythematosus</li> <li>33. SLE</li> <li>34. Libman-Sacks disease</li> <li>35. Libman Sacks disease</li> <li>36. Lupus erythematosus disseminatus</li> <li>37. Disseminated lupus erythematosus</li> <li>38. Lupus syndrome</li> <li>39. Scleroderma, Systemic (mesh) (exp) (include all subheadings)</li> <li>40. SSc</li> </ol> |



|                   |                                                                                                                                                                                                                                                                                                                                                                                                                                                                                                                                                                     |
|-------------------|---------------------------------------------------------------------------------------------------------------------------------------------------------------------------------------------------------------------------------------------------------------------------------------------------------------------------------------------------------------------------------------------------------------------------------------------------------------------------------------------------------------------------------------------------------------------|
|                   | <p>41. Thibierge-Weissenbach syndrome</p> <p>42. Morphea</p> <p>43. Gout (mesh) (exp) (include all subheadings)</p> <p>44. Gout\$</p> <p>45. Podagra</p> <p>46. Tophus</p> <p>47. Tophi</p> <p>48. Tophaceous</p> <p>49. Urate</p> <p>50. Uric acid</p> <p>51. Hyperurecemi\$ [have to uncheck "map team to subject heading"]</p> <p>52. Hyperurecaemi\$ [have to uncheck "map team to subject heading"]</p> <p>53. Hyperuricemia\$</p> <p>54. Hyperuricaemi\$ [have to uncheck "map team to subject heading"]</p> <p>55. arthritis urica</p> <p>56. Gout acute</p> |
| <i>Exposure</i>   | <p>57. Alcohol\$</p> <p>58. Beer</p> <p>59. Wine</p> <p>60. Spirit\$</p> <p>61. Liquor</p> <p>62. Alcoholic drinking (mesh) (explode) (include subheadings)</p> <p>63. Alcoholic beverages</p>                                                                                                                                                                                                                                                                                                                                                                      |
| <i>Exclusions</i> | <p>64. Cross-sectional</p> <p>65. Cross sectional</p> <p>66. Children</p> <p>67. Child</p> <p>68. Juvenile</p> <p>69. Adolescent</p> <p>70. Teenager</p> <p>71. Animal</p> <p>72. Rat</p> <p>73. Mouse</p> <p>74. Case study</p> <p>75. Case series</p> <p>76. Systematic adj5 review</p> <p>77. Narrative review</p> <p>78. Meta-analysis (mesh) (exp)</p> <p>79. Meta analysis</p> <p>80. Meta adj5 analysis</p> <p>81. Meta-synthesis</p> <p>82. Meta synthesis</p> <p>83. Meta adj5 synthesis</p> <p>84. Literature review</p> <p>85. Literature search</p>     |

|                 |                                                                                                                                                                                                                                                                                                                                                                                                                                                                                                                                                                                                                                                                                                                      |
|-----------------|----------------------------------------------------------------------------------------------------------------------------------------------------------------------------------------------------------------------------------------------------------------------------------------------------------------------------------------------------------------------------------------------------------------------------------------------------------------------------------------------------------------------------------------------------------------------------------------------------------------------------------------------------------------------------------------------------------------------|
|                 | 86. Meta-narrative review<br>87. Meta narrative review<br>88. Case-control                                                                                                                                                                                                                                                                                                                                                                                                                                                                                                                                                                                                                                           |
| Combining terms | 89. RA – 1 OR 2 OR 3 OR 4 OR 5 OR 6<br>90. OA – 7 OR 8 OR 9 OR 10 OR 11 OR 12 OR 13<br>91. PSA – 14 OR 15 OR 16 OR 17 OR 18 OR 19 OR 20 OR 21 OR 22<br>92. AS – 23 OR 24 OR 25 OR 26 OR 27 OR 28 OR 29 OR 30<br>93. SLE – 31 OR 32 OR 33 OR 34 OR 35 OR 36 OR 37 OR 38<br>94. SSc – 39 OR 40 OR 41 OR 42<br>95. Gout – 43 OR 44 OR 45 OR 46 OR 47 OR 48 OR 49 OR 50 OR 51 OR 52 OR 53 OR 54 OR 55 OR 56<br>96. Diseases –89 OR 90 OR 91 OR 92 OR 93 OR 94 OR 95 OR 96<br>97. Alcohol – 57 OR 58 OR 59 OR 60 OR 61 OR 62 OR 63<br>98. Exclusions –64 OR 65 OR 66 OR 67 OR 68 OR 72 OR 73 OR 74 OR 75 OR 76 OR 77 OR 78 OR 79 OR 80 OR 81 OR 82 OR 83 OR 84 OR 85 OR 86 OR 87 OR 88<br>99. 96 AND 97<br>100. 99 NOT 98 |

### Supplementary table 5 – Included outcomes and examples of measures used to assess these outcomes

|                        |                                                                                                                                                                                                                                                                                                                                                                                                                                                                                                                                                                                                                                                                                                                                                                                                                                                                                                                                              |
|------------------------|----------------------------------------------------------------------------------------------------------------------------------------------------------------------------------------------------------------------------------------------------------------------------------------------------------------------------------------------------------------------------------------------------------------------------------------------------------------------------------------------------------------------------------------------------------------------------------------------------------------------------------------------------------------------------------------------------------------------------------------------------------------------------------------------------------------------------------------------------------------------------------------------------------------------------------------------|
| • Disease activity     |                                                                                                                                                                                                                                                                                                                                                                                                                                                                                                                                                                                                                                                                                                                                                                                                                                                                                                                                              |
| ○ OA                   | <ul style="list-style-type: none"> <li>▪ Western Ontario and McMaster Universities Arthritis Index [WOMAC]</li> </ul>                                                                                                                                                                                                                                                                                                                                                                                                                                                                                                                                                                                                                                                                                                                                                                                                                        |
| ○ RA                   | <ul style="list-style-type: none"> <li>▪ Acute phase reactants (i.e. C-reactive protein and erythrocyte sedimentation rate)</li> <li>▪ Swollen joint count</li> <li>▪ Tender joint count</li> <li>▪ Physician global assessment of disease activity (VAS)</li> <li>▪ Patient global health (VAS)</li> <li>▪ Disease activity composite measures (eg. Disease Activity Score [DAS28, DAS44], Rheumatoid arthritis Impact of Disease Score [RAID])</li> </ul>                                                                                                                                                                                                                                                                                                                                                                                                                                                                                  |
| ○ PsA <sup>1</sup>     | <ul style="list-style-type: none"> <li>▪ Acute phase reactants (i.e. C-reactive protein and erythrocyte sedimentation rate)</li> <li>▪ Swollen joint count</li> <li>▪ Tender joint count</li> <li>▪ Physician global assessment of disease activity (VAS)</li> <li>▪ Patient global assessment of disease activity (VAS)</li> <li>▪ Dactylitis (e.g. Leeds dactylitis index)</li> <li>▪ Enthesitis (e.g. Mander/Newcastle Enthesitis Index, Leeds Enthesitis index)</li> <li>▪ Extent of psoriasis (e.g. Psoriasis Area and Severity Index [PASI])</li> <li>▪ Nail involvement (e.g. Nail Psoriasis Severity Index)</li> <li>▪ Disease activity composite measures (e.g. Composite Psoriatic Disease Activity Index [CPDAI], Disease Activity in Psoriatic Arthritis [DAPSA], clinical Disease Activity in Psoriatic Arthritis [cDAPSA], PsA Impact of Disease Score [PsAID] Psoriatic Arthritis Disease Activity Score [PASDAS])</li> </ul> |
| ○ AxSpA <sup>2</sup>   | <ul style="list-style-type: none"> <li>▪ Acute phase reactants (i.e. C-reactive protein and erythrocyte sedimentation rate)</li> <li>▪ Swollen joint count</li> <li>▪ Tender joint count</li> <li>▪ Disease activity composite measures (e.g. Ankylosing Spondylitis Disease Activity Score [ASDAS], Bath Ankylosing Spondylitis Disease Activity Index [BASDAI], Disease Activity Score [DAS44])</li> <li>▪ Enthesitis</li> <li>▪ Spinal mobility (e.g. Bath Ankylosing Spondylitis Metrology Index [BASMI])</li> <li>▪ Stiffness</li> </ul>                                                                                                                                                                                                                                                                                                                                                                                                |
| ○ SLE <sup>3</sup>     | <ul style="list-style-type: none"> <li>▪ Disease activity composite measures (e.g. British Isles Lupus Assessment Group measure [BILAG], Systemic Lupus Erythematosus Disease Activity Index [SLEDAI])</li> <li>▪ Organ damage measures (e.g. Systemic Lupus International Collaborating Clinics [SLICC]/American College of Rheumatology Damage Index [SDI])</li> </ul>                                                                                                                                                                                                                                                                                                                                                                                                                                                                                                                                                                     |
| ○ SSc <sup>4</sup>     | <ul style="list-style-type: none"> <li>▪ Skin (e.g. Modified Rodnan skin score, visual analogue scale [VAS]/likert scale, Durometer reading)</li> <li>▪ Musculoskeletal (e.g. tender joint count, tender friction rubs assessed by doctor, serum creatinine)</li> <li>▪ Cardiac / pulmonary / renal / gastrointestinal involvement</li> <li>▪ Raynaud's phenomenon (e.g. Raynaud condition score, VAS raynauds)</li> <li>▪ Digital ulcers (e.g. activity digital tip ulcer count on volar surface, VAS digital ulcer)</li> <li>▪ Acute phase reactants (i.e. C-reactive protein and erythrocyte sedimentation rate)</li> </ul>                                                                                                                                                                                                                                                                                                               |
| ○ Gout <sup>5</sup>    | <ul style="list-style-type: none"> <li>▪ Serum urate</li> <li>▪ Gout flare recurrence</li> <li>▪ Tophus regression<sup>6</sup> / tophi number</li> <li>▪ Joint inflammation / tenderness score</li> </ul>                                                                                                                                                                                                                                                                                                                                                                                                                                                                                                                                                                                                                                                                                                                                    |
| • Physical functioning |                                                                                                                                                                                                                                                                                                                                                                                                                                                                                                                                                                                                                                                                                                                                                                                                                                                                                                                                              |
| ○ OA                   | <ul style="list-style-type: none"> <li>▪ Physical function (e.g. the Knee Injury and Osteoarthritis Outcome Score [KOOS], Veterans Short Form 12 Health Survey [VR-12], Hip disability and Osteoarthritis Outcome Score [HOOS], WOMAC).</li> <li>▪ Objective measures (e.g. gait speed, grip strength)</li> <li>▪ Range of motion of effected joint</li> </ul>                                                                                                                                                                                                                                                                                                                                                                                                                                                                                                                                                                               |
| ○ RA                   | <ul style="list-style-type: none"> <li>▪ Physical function (e.g. the Health Assessment Questionnaire [HAQ], Arthritis Impact Measurement Scale [AIMS], SF36-physical function)</li> <li>▪ Objective measures (e.g. gait speed, grip strength)</li> </ul>                                                                                                                                                                                                                                                                                                                                                                                                                                                                                                                                                                                                                                                                                     |
| ○ PsA                  | <ul style="list-style-type: none"> <li>▪ Physical function (e.g. the HAQ, Arthritis Impact Measurement Scale [AIMS], SF36-physical function)</li> <li>▪ Objective measures (e.g. gait speed, grip strength)</li> </ul>                                                                                                                                                                                                                                                                                                                                                                                                                                                                                                                                                                                                                                                                                                                       |
| ○ AxSpA                | <ul style="list-style-type: none"> <li>▪ Physical function (e.g. Health Assessment Questionnaire for the Spondylarthropathies [HAQ-S], Dougados Functional Index [DFI], Bath Ankylosing Spondylitis Functional Index [BASFI])</li> </ul>                                                                                                                                                                                                                                                                                                                                                                                                                                                                                                                                                                                                                                                                                                     |

|   |                                                                                                                                                 |                                                                                                      |
|---|-------------------------------------------------------------------------------------------------------------------------------------------------|------------------------------------------------------------------------------------------------------|
|   | ○ SLE <sup>7</sup>                                                                                                                              | ▪ Objective measures (e.g. gait speed, grip strength)                                                |
|   |                                                                                                                                                 | ▪ Physical function (e.g. the HAQ, SF-36 physical function, Valued Life Activities Disability Scale) |
|   | ○ SSc                                                                                                                                           | ▪ Objective measures (e.g. gait speed, grip strength)                                                |
|   |                                                                                                                                                 | ▪ Physical function (e.g. the HAQ, SF-36).                                                           |
|   | ○ Gout                                                                                                                                          | ▪ Objective measures (e.g. gait speed, grip strength)                                                |
|   |                                                                                                                                                 | ▪ Physical function (e.g. HAQ <sup>5,8</sup> , SF-36)                                                |
|   |                                                                                                                                                 | ▪ Objective measures (e.g. gait speed, grip strength)                                                |
| • | Pain                                                                                                                                            |                                                                                                      |
|   | ○ OA <sup>9</sup>                                                                                                                               | ▪ OARSI-OMERACT Initiative: New OA Pain Measure                                                      |
|   |                                                                                                                                                 | ▪ Dallas Pain Questionnaire                                                                          |
|   |                                                                                                                                                 | ▪ Neck Pain and Disability Scale [NPAD]                                                              |
|   |                                                                                                                                                 | ▪ WOMAC                                                                                              |
|   |                                                                                                                                                 | ▪ Australian/Canadian Hand OA Index (AUSCAN)                                                         |
|   | ○ RA                                                                                                                                            | ▪ Patient pain rating (e.g. visual analogue scale)                                                   |
|   | ○ PSA                                                                                                                                           | ▪ Patient pain rating (e.g. visual analogue scale)                                                   |
|   | ○ AxSpA                                                                                                                                         | ▪ Patient pain rating (e.g. visual analogue scale)                                                   |
|   | ○ SLE                                                                                                                                           | ▪ Patient pain rating (e.g. visual analogue scale)                                                   |
|   | ○ SSc                                                                                                                                           | ▪ Patient pain rating (e.g. visual analogue scale)                                                   |
|   | ○ Gout                                                                                                                                          | ▪ Patient pain rating (e.g. visual analogue scale / likert scale) <sup>10</sup>                      |
| • | Fatigue                                                                                                                                         |                                                                                                      |
|   | ○ OA                                                                                                                                            | ▪ Patient fatigue rating (e.g. visual analogue scale, other disease specific measure)                |
|   |                                                                                                                                                 | ▪ Generic fatigue questionnaire (e.g. Chalder Fatigue Scale)                                         |
|   | ○ RA                                                                                                                                            | ▪ Patient fatigue rating (e.g. visual analogue scale, other disease specific measure)                |
|   |                                                                                                                                                 | ▪ Generic fatigue questionnaire (e.g. Chalder Fatigue Scale)                                         |
|   |                                                                                                                                                 | ▪ Bristol Rheumatoid Arthritis Fatigue – multidimensional questionnaire (BRAf-MDQ)                   |
|   | ○ PSA                                                                                                                                           | ▪ Patient fatigue rating (e.g. visual analogue scale, other disease specific measure)                |
|   |                                                                                                                                                 | ▪ Generic fatigue questionnaire (e.g. Chalder Fatigue Scale)                                         |
|   | ○ AxSpA                                                                                                                                         | ▪ Patient fatigue rating (e.g. visual analogue scale, other disease specific measure)                |
|   |                                                                                                                                                 | ▪ Generic fatigue questionnaire (e.g. Chalder Fatigue Scale)                                         |
|   | ○ SLE                                                                                                                                           | ▪ Patient fatigue rating (e.g. visual analogue scale, other disease specific measure)                |
|   |                                                                                                                                                 | ▪ Generic fatigue questionnaire (e.g. Chalder Fatigue Scale)                                         |
|   | ○ SSc                                                                                                                                           | ▪ Patient fatigue rating (e.g. visual analogue scale, other disease specific measure)                |
|   |                                                                                                                                                 | ▪ Generic fatigue questionnaire (e.g. Chalder Fatigue Scale)                                         |
|   | ○ Gout                                                                                                                                          | ▪ Patient fatigue rating (e.g. visual analogue scale, other disease specific measure)                |
|   |                                                                                                                                                 | ▪ Generic fatigue questionnaire (e.g. Chalder Fatigue Scale)                                         |
| • | Erosions                                                                                                                                        |                                                                                                      |
|   | ○ Joint damage by X-ray (e.g. Sharp method, Larsen method, Lane Index, Wilke Index, Kellgren-Lawrence hand OA radiological index <sup>9</sup> ) |                                                                                                      |
| • | Physical comorbidity                                                                                                                            |                                                                                                      |
|   | ○ Major comorbidity                                                                                                                             |                                                                                                      |
|   |                                                                                                                                                 | ▪ MACE (major adverse cardiac event)                                                                 |
|   |                                                                                                                                                 | ▪ Lung disease                                                                                       |
|   |                                                                                                                                                 | ▪ Peptic ulcer disease                                                                               |
|   |                                                                                                                                                 | ▪ Liver disease                                                                                      |
|   |                                                                                                                                                 | ▪ Renal disease                                                                                      |
|   |                                                                                                                                                 | ▪ Tuberculosis / other serious infections                                                            |
|   |                                                                                                                                                 | ▪ Diabetes                                                                                           |
|   |                                                                                                                                                 | ▪ Hyperthyroidism                                                                                    |
|   |                                                                                                                                                 | ▪ Depression                                                                                         |
|   |                                                                                                                                                 | ▪ Cancer                                                                                             |
|   |                                                                                                                                                 | ▪ Fractures                                                                                          |
|   |                                                                                                                                                 | ▪ High cholesterol / dyslipidaemia                                                                   |
| • | Mental health                                                                                                                                   |                                                                                                      |
|   | ○ Mental health assessment questionnaires (e.g. Hospital Anxiety and Depression Scale (HADS), the AIMS, Mini-mental state examination)          |                                                                                                      |

- Quality of life (e.g. EQ-5D, SF-36)
  - Disease specific quality of life measures (e.g. RaQOL<sup>11</sup>, ASQOL<sup>12</sup>, PsAQoL<sup>13</sup>)
- Work status
  - Categorical rating of work status (e.g. at work, retired, sick leave)
  - Number of days absent from work in a given time window

**Supplementary table 6 – Oxford Centre for Evidence-Based Medicine Levels of Evidence**

| <b>Level</b> | <b>Therapy/prevention/aetiology/harm</b>                                                                         |
|--------------|------------------------------------------------------------------------------------------------------------------|
| 1a           | Systematic review with homogeneity of RCTs                                                                       |
| 1b           | Individual RCT (with narrow confidence interval)                                                                 |
| 1c           | All or none                                                                                                      |
| 2a           | Systematic review with homogeneity of cohort studies                                                             |
| 2b           | Individual cohort study (including low quality RCT; e.g. <80% follow-up)                                         |
| 2c           | 'Outcomes' research; ecological studies                                                                          |
| 3a           | Systematic review (with homogeneity) of case-control studies                                                     |
| 3b           | Individual case-control study                                                                                    |
| 4            | Case-series (and poor quality cohort and case-control studies)                                                   |
| 5            | Expert opinion without explicit critical appraisal, or based on physiology, bench research or "first principles" |

*From Oxford Centre for Evidence-based Medicine Levels of Evidence. March 2009.*

<http://www.cebm.net/?o=1116>

**Supplementary table 7 – Osteoarthritis and smoking: evidence from meta-analyses and systematic reviews**

| Author (date)                      | Type of review | Study type included | Type of OA | Outcomes                 | Smoking negatively associated with outcome | Key findings                                                                                                                                               | AMSTAR2  |
|------------------------------------|----------------|---------------------|------------|--------------------------|--------------------------------------------|------------------------------------------------------------------------------------------------------------------------------------------------------------|----------|
| Pearce et al., 2013 <sup>1</sup>   | MA             | CC, cohorts         | All sites  | Radiographic progression | Radiographic progression: ✘                | Overall, no association between smoking and radiographic progression of OA (OR 0.92, 95% CI 0.83, 1.02)                                                    | Moderate |
| de Rooij et al., 2016 <sup>2</sup> | SR             | Prospective cohorts | Knee       | Pain, function           | Pain: ✘<br>Function: ✔                     | Pain: inconsistent evidence (1/2 low quality studies reported an association) function: strong evidence (2/2 high quality studies reported an association) | Moderate |
| Bastick et al., 2015 <sup>3</sup>  | SR             | CC, cohorts         | Knee       | Radiographic progression | Radiographic progression: ✘                | Reported that 3/3 comparisons did not find as association between smoking and radiographic progression                                                     | Moderate |

AMSTAR2 = Assessing the Methodological Quality of Systematic Reviews 2, CC = case-control studies, CI = confidence interval, MA = meta-analysis, OA = osteoarthritis, OR = odds ratio, SR = systematic review

## Supplementary table 8 – Osteoarthritis and smoking: evidence from individual studies

| Author                              | Exposure                                                                                                         | Study design             | Inclusion criteria                                                                                                                                                                                                                                                                                                            | Outcomes                                                                                                                                                   | Adjustment variables                                                                                                                               | Nb participants | Follow-up length | Age                                                | Gender                       | Key findings                                                                                                                                                                                                                                                                                                                                                                                                                                                                                                                             |
|-------------------------------------|------------------------------------------------------------------------------------------------------------------|--------------------------|-------------------------------------------------------------------------------------------------------------------------------------------------------------------------------------------------------------------------------------------------------------------------------------------------------------------------------|------------------------------------------------------------------------------------------------------------------------------------------------------------|----------------------------------------------------------------------------------------------------------------------------------------------------|-----------------|------------------|----------------------------------------------------|------------------------------|------------------------------------------------------------------------------------------------------------------------------------------------------------------------------------------------------------------------------------------------------------------------------------------------------------------------------------------------------------------------------------------------------------------------------------------------------------------------------------------------------------------------------------------|
| Amin et al., 2007 <sup>4</sup>      | Cigarette smoking assessed with a standard questionnaire<br>2 groups: current smokers at baseline vs non-smokers | Prospective cohort study | -presence of osteophyte present on radiographs of the symptomatic knee<br>-be able to walk, with or without the aid of a cane<br>-be willing to participate in the longitudinal study<br>-meet the American College of Rheumatology criteria for symptomatic knee osteoarthritis<br>-men<br>-minimum age of entry of 45 years | cartilage loss, knee pain (visual analog scale)                                                                                                            | Age, body mass index and baseline cartilage scores<br><br>Other potential confounders: knee pain and physical activity at baseline, and alignment. | 159             | 30 months        | Mean (SD), years: 68 (9)                           | 159 (100%) men               | Current smokers: increased risk for cartilage loss at the medial compartment of the tibiofemoral joint: OR=2.3 (1.0 to 5.4) and patellofemoral joint: OR=2.5 (1.1 to 5.7) compared with men who were not current smokers<br>No increased risk for cartilage loss at the lateral compartment: OR=1.2 (0.3 to 4.2)<br>Adjusted change in knee-specific VAS pain scores over follow-up not significantly different between men who were and were not current smokers (20.3, 95% CI 214.9 to 14.3 vs 21.0, 95% CI 26.0 to 4.0, respectively) |
| Kalichman et al., 2005 <sup>5</sup> | Smoking (yes vs no)                                                                                              | Prospective cohort study | Chuvashians (Caucasians of European origin) who live in many small villages in the Chuvasha Autonomy of the Russian Federation                                                                                                                                                                                                | Progression rate of hand OA between two evaluations of OA to investigate the rate of hand OA progression in different joint rows, as well as in all joints | age, age <sup>2</sup> , body weight, stature, and body mass index                                                                                  | 273             | 8 years          | Men: 45.3 (16.1) years<br>Women: 49.7 (15.3) years | Men: N=137<br>Women: N = 136 | Influences of life-style factors on rate of hand OA progression: no significant associations or group differences in relation to smoking                                                                                                                                                                                                                                                                                                                                                                                                 |
| Nishimura et al., 2011 <sup>6</sup> | Cigarette smoking (yes vs no)                                                                                    | Prospective cohort study | -age ≥65 years of age in Miyagawa, a mountain village located in the centre of Mie Prefecture, Japan                                                                                                                                                                                                                          | Progression of radiographic osteoarthritis of the knee (KL grade)                                                                                          | -                                                                                                                                                  | 360             | 4 years          | Mean (SD): 71.0 (4.7) years                        | Men: N=119<br>Women: N=241   | Cigarette smoking: OR=0.732 (95%CI: 0.087–6.151), p= 0.7742<br>No significant association                                                                                                                                                                                                                                                                                                                                                                                                                                                |



**Supplementary table 9 – Osteoarthritis and smoking: methodological quality of individual studies**

| Authors                             | Study participation | Study attrition       | Prognostic factor measurement | Outcome measurement | Study confounding     | Statistical analysis and reporting | Quality  |
|-------------------------------------|---------------------|-----------------------|-------------------------------|---------------------|-----------------------|------------------------------------|----------|
| Amin et al., 2007 <sup>4</sup>      | Low risk of bias    | Moderate risk of bias | Low risk of bias              | Low risk of bias    | Moderate risk of bias | Low risk of bias                   | Moderate |
| Kalichman et al., 2005 <sup>5</sup> | Low risk of bias    | High risk of bias     | Low risk of bias              | Low risk of bias    | Low risk of bias      | Moderate risk of bias              | Low      |
| Nishimura et al., 2011 <sup>6</sup> | Low risk of bias    | High risk of bias     | Low risk of bias              | Low risk of bias    | Moderate risk of bias | Low risk of bias                   | Low      |

**Supplementary table 10 – Rheumatoid arthritis and smoking: evidence form meta-analyses and systematic reviews**

| Author (date)                      | Type of review | Study type included   | Outcomes                 | Smoking associated with worse outcome | Key findings (negative MD/SMD favours intervention)                                                                        | AMSTAR2  |
|------------------------------------|----------------|-----------------------|--------------------------|---------------------------------------|----------------------------------------------------------------------------------------------------------------------------|----------|
| Baghdadi et al., 2015 <sup>7</sup> | MA             | Observational studies | Cardiovascular morbidity | Cardiovascular morbidity: ✓           | Cardiovascular morbidity: meta-RR 1.50 (1.15, 1.84) vs non-smokers; smoking associated with worse cardiovascular morbidity | Moderate |
| Daien et al., 2017 <sup>8</sup>    | SR             | Observational studies | Treatment response       | Treatment response: ✓                 | Smoking associated with lower odds of response to first-line DMARD with positive predictive value ranging from 38% to 71%  | Low      |

AMSTAR2 = Assessing the Methodological Quality of Systematic Reviews 2, MA = meta-analysis, RCTs = randomized controlled trials, RR = relative risk, SR = systematic review

## Supplementary table 11 – Early rheumatoid arthritis and smoking: evidence from individual studies

| Author                               | Exposure detail                                                           | Study design             | Inclusion criteria                                                                                                                                                                                                                                      | Outcomes                                                                                                               | Adjustment variables                | Nb participants | Follow-up length | Age                                   | Gender                                     | Key findings                                                                                                                                                                                                                                                                                                                                                                                                                                                                                                  |
|--------------------------------------|---------------------------------------------------------------------------|--------------------------|---------------------------------------------------------------------------------------------------------------------------------------------------------------------------------------------------------------------------------------------------------|------------------------------------------------------------------------------------------------------------------------|-------------------------------------|-----------------|------------------|---------------------------------------|--------------------------------------------|---------------------------------------------------------------------------------------------------------------------------------------------------------------------------------------------------------------------------------------------------------------------------------------------------------------------------------------------------------------------------------------------------------------------------------------------------------------------------------------------------------------|
| Andersson et al., 2012 <sup>9</sup>  | Cigarette smoking<br><br>Never smokers, current smokers, previous smokers | Prospective cohort study | -early RA<br>-disease duration of less or equal 2 years at inclusion<br>-age over 18 years                                                                                                                                                              | -EULAR response<br>-Functional status (HAQ)<br>-Pain (visual analog scale)<br>-CRP levels<br>-Disease activity (DAS28) | -                                   | 1460            | 8 years          | Mean: 56 years (min 47-max 65)        | Women: 70%                                 | -No clear differences in disease activity between never-smokers, current smokers, and patients who had stopped smoking — in HAQ, in VAS pain, in DAS28<br>-Significant difference in CRP levels at 2 years of follow-up (p=0.03)<br>non-smokers: 10 units<br>smokers: 11 units<br>patients having stopped smoking before inclusion: 11 units<br>patients having stopped smoking < 2 years after inclusion: 12 units<br>-No statistical differences in EULAR response between the different smoking categories |
| Andersson et al., 2017 <sup>10</sup> | Cigarette smoking<br><br>Non-smokers, current smokers, previous smokers   | Prospective cohort study | -early RA<br>-disease duration of less or equal 2 years at inclusion<br>-age over 18 years                                                                                                                                                              | - Functional status (HAQ)                                                                                              | Sex, age, RF, and DMARD at baseline | 1938            | 8 years          | Cohort 1 : 53(14) / Cohort 2 : 56(15) | Cohort1 : women 68% / Cohort 2 : women 70% | No differences in HAQ change over time, short- or long-term, among non-smokers, current smokers, and previous smokers                                                                                                                                                                                                                                                                                                                                                                                         |
| Bird et al., 2017 <sup>11</sup>      | Smoking<br><br>Never smokers, ex-smokers, current smokers                 | Prospective cohort study | All newly presented patients with RA whose date of clinical onset was < 12 months from their initial presentation at the clinic, were<br>-18 years of age or older<br>-be treated at a participating clinic<br>-DAS28-ESR recorded in the time up to 24 | DAS28-ESR remssion                                                                                                     | Age and sex                         | 1017            | 2 years          | Mean (SD): 60.4 (14.7)                | Women: 70%                                 | Multivariate OR (95% CI)<br>Current versus ex-smokers: 0.86 (95% CI: 0.50 - 1.46), p = 0.567<br>Current versus never smokers: 1.00 (95% CI: 0.60 - 1.67), p= 0.990<br>Ex-smokers versus never smokers: 1.17 (95% CI: 0.83 - 1.67), p= 0.372<br>No significant association                                                                                                                                                                                                                                     |

| Author(s)                                 | Exposure                                                          | Study Design             | Inclusion/Exclusion Criteria                                                                                                                | Outcomes                                                                                                                                                    | Treatment                                                      | n    | Duration | Mean (SD)                    | Women (%)  | Results                                                                                                                                                                                                                                                                                                                                                                                                                                                                                                                                                                                                                                                                 |
|-------------------------------------------|-------------------------------------------------------------------|--------------------------|---------------------------------------------------------------------------------------------------------------------------------------------|-------------------------------------------------------------------------------------------------------------------------------------------------------------|----------------------------------------------------------------|------|----------|------------------------------|------------|-------------------------------------------------------------------------------------------------------------------------------------------------------------------------------------------------------------------------------------------------------------------------------------------------------------------------------------------------------------------------------------------------------------------------------------------------------------------------------------------------------------------------------------------------------------------------------------------------------------------------------------------------------------------------|
| Manfredsdottir et al., 2006 <sup>12</sup> | Tobacco smoking<br>Current smokers, former smokers, never smokers | Prospective cohort study | months from the date of first consultation with the treating rheumatologist for RA<br>- patients who fulfilled the 1987 ACR criteria for RA | -Disease activity<br>-Pain score (VAS)<br>-Radiographic progression (Sharp/ van der Heije score)                                                            | -                                                              | 100  | 2 years  | Mean (SD): 53.4 (17.9) years | Women: 57% | -Current smokers had the highest and the never smokers the lowest disease activity (P<0.001 and P= 0.02, respectively)<br>No association between disease activity and the number of pack-years of tobacco smoking<br>-CRP levels: no significant difference in CRP levels at any time point between the groups<br>-Overall VAS pain score for the three groups: statistically significant differences (P = 0.005)<br>Never smokers had significantly lower VAS pain score only at entry (P = 0.04)<br>-No significant influence of smoking status on radiographic progression and no correlation between number of pack-years of tobacco smoking and radiological score |
| McWilliams et al., 2012 <sup>13</sup>     | Smoking<br>Never smokers, ever smokers                            | Prospective cohort study | All patients who had attended the 22 outpatient centers of the Early Rheumatoid Arthritis Network and provided appropriate data             | Pain (SF-36)                                                                                                                                                | NSAID, DMARD, and regular corticosteroid usage                 | 1189 | 1 year   | 58 years (min: 47- max: 68)  | Women: 68% | Ever smoked ( vs never smoked): OR=1.03 (95% CI 0.68 -1.57), p= 0.915<br>Non-significant association                                                                                                                                                                                                                                                                                                                                                                                                                                                                                                                                                                    |
| Nyhall-Wahlin et al., 2009 <sup>14</sup>  | Smoking<br>Non-smokers, smokers, ex-smokers, never smokers        | Prospective cohort study | -Symptoms of arthritis (swollen joints) for 12 months<br>-At least four of seven items from the 1987 ACR classification criteria for RA     | Severe extra-articular manifestations (including pericarditis, pleuritis, interstitial lung disease, Felty's syndrome, neuropathy, scleritis, episcleritis, | Current smoking at baseline and glucocorticosteroids treatment | 40   | 2 years  | Mean (SD): 58.5 (11.6) years | Women: 72% | Current smoking at disease onset increased the risk for extra-articular manifestations OR=2.84 (1.15 - 6.98) for current vs non-smokers<br>OR=4.11 (1.18 - 14.30) for current vs never smokers<br>No increased risk for former smokers: OR=1.69 (0.52 - 5.46) vs never smokers                                                                                                                                                                                                                                                                                                                                                                                          |

|                                          |                                                                                                                                 |                          |                                                                                                                                                                                                                          |                                                                                                                                                                                                       |                                                                                                                               |     |                                 |                         |                    |                                                                                                                                                                                                                                                                                                                                                                                                                                                                                                                                                                                                                             |
|------------------------------------------|---------------------------------------------------------------------------------------------------------------------------------|--------------------------|--------------------------------------------------------------------------------------------------------------------------------------------------------------------------------------------------------------------------|-------------------------------------------------------------------------------------------------------------------------------------------------------------------------------------------------------|-------------------------------------------------------------------------------------------------------------------------------|-----|---------------------------------|-------------------------|--------------------|-----------------------------------------------------------------------------------------------------------------------------------------------------------------------------------------------------------------------------------------------------------------------------------------------------------------------------------------------------------------------------------------------------------------------------------------------------------------------------------------------------------------------------------------------------------------------------------------------------------------------------|
| Papadopoulos et al., 2005 <sup>15</sup>  | Cigarette smoking<br><br>Current smokers, never smokers, ex-smokers<br><br>Numbers of pack years                                | Prospective cohort study | - American College of Rheumatology criteria for RA<br>-disease duration of less than one year<br>-no prior treatment of disease modifying anti-rheumatic drugs or steroids                                               | glomerulonephritis , major cutaneous vasculitis)<br>Disease expression, activity and severity: number of total joint count with tenderness and swelling, disease activity (DAS-28) and Larsen's score | Age, sex, DAS-28 score at baseline, Larsen's score at baseline, RF IgM, RF IgA and follow-up duration at the end of the study | 293 | Max mean follow-up: 46.8 months | NA                      | Women: 69,7%       | All parameters studied differ significantly among the three groups, and current smokers present more active and severe disease than ex-smokers, and never smokers as evaluated by tender and swollen joint count, DAS-28, CRP, ESR (all p-values < 0.001)<br>Ex-smokers: higher levels than the never smokers for all these parameters<br>At last follow-up:<br>Non-significant associations between the numbers of pack years and disease activity and radiological damage (Larsen score)                                                                                                                                  |
| Ruiz-Esquide et al., 2011 <sup>16</sup>  | Ever smokers, past smokers (smoking cessation ≥ 1 year before disease onset), current smokers at disease onset, and non-smokers | Prospective cohort study | -Consecutive outpatients attending the rheumatology units of the Hospital Clinic, Barcelona, and Hospital Parc Taulí, Sabadell, Spain<br>-American College of Rheumatology RA criteria<br>-symptoms duration < 24 months | -Clinical disease activity (28-joint Disease Activity Score)<br>- EULAR response<br>-Radiographic progression (Erosion Joint Count (EJC) and Larsen scores)                                           | -                                                                                                                             | 156 | 2 years                         | Mean (SD): 54.4 (14.9)  | Women: 130 (83.3%) | Clinical disease activity at 12 and 24 months: similar in non-smokers vs current smokers<br>Similar results when comparisons between ever-smokers and nonsmokers, current heavy smokers and nonsmokers<br>Association with Larsen scores :<br>Smoking (past vs nonsmoker) beta = 0.486 (-4.52, 5.49) p = 0.848<br>Smoking (current vs nonsmoker) beta = 4.274 (0.49, 8.05), p = 0.027<br>Similar results were obtained when EJC was used as the measure of radiographic damage.<br>Smoking (past vs nonsmoker) beta = -0.065 (-0.8, 0.67), p = 0.861<br>Smoking (current vs nonsmoker) beta = 0.603 (0.05, 1.16), p = 0.034 |
| Saevarsdottir et al., 2015 <sup>17</sup> | Current, past or never cigarette smokers<br><br>Current smokers versus non-smokers, pooling past and never                      | Prospective cohort study | -RA according to the 1987 revised American College of Rheumatology criteria<br>-Age ≥18 years<br>- Symptom duration <1 year                                                                                              | radiographic progression (increase in total Sharp-vander Hejde score of ≥5 after 1 year)                                                                                                              | Gender, symptom duration, baseline erosions and HAQ                                                                           | 311 | 1 year                          | Median (IQR: 57 (46–64) | Men: 87 (28%)      | Predictors of rapid radiographic progression<br>Current vs never smokers: OR (95% CI) = 2.25 (1.12 to 4.54)<br>Past vs never smokers: OR = 0.75 (0.38 to 1.48)<br>Current smokers vs non- smokers: OR = 2.67 (1.44 to 4.95)                                                                                                                                                                                                                                                                                                                                                                                                 |

|                                      |                                                                                                                                                                                                                    |                                                                 |                                                                                                                                                                                                                                                                                                      |                                                                                                                                                             |                                                                                                                                                                          |     |         |                                  |              |                                                                                                                                                                                                                                                                                                                                                                  |
|--------------------------------------|--------------------------------------------------------------------------------------------------------------------------------------------------------------------------------------------------------------------|-----------------------------------------------------------------|------------------------------------------------------------------------------------------------------------------------------------------------------------------------------------------------------------------------------------------------------------------------------------------------------|-------------------------------------------------------------------------------------------------------------------------------------------------------------|--------------------------------------------------------------------------------------------------------------------------------------------------------------------------|-----|---------|----------------------------------|--------------|------------------------------------------------------------------------------------------------------------------------------------------------------------------------------------------------------------------------------------------------------------------------------------------------------------------------------------------------------------------|
|                                      | smokers in the latter group                                                                                                                                                                                        |                                                                 | -28-joint disease activity score >3.2, no previous disease modifying antirheumatic drug treatment -stable prednisolone dose, if present, for ≥4 weeks before entry and throughout the study of ≤10 mg/day                                                                                            |                                                                                                                                                             |                                                                                                                                                                          |     |         |                                  |              | Predictors of radiographic progression (SHS score increase >1)<br>Current vs never smokers: OR = 2.31 (1.18 to 4.54)<br>Past vs never smokers: OR = 0.92 (0.52 to 1.65)<br>Current smokers vs non-smokers: OR = 2.42 (1.33 to 4.42)                                                                                                                              |
| Vesperini et al., 2013 <sup>18</sup> | Patients' smoking habits<br><br>Current smokers (active smoking)<br>Ex-smokers (all patients who had stopped smoking before the first examination at inclusion)<br>Non-smokers (no history of smoking at any time) | Prospective cohort study                                        | -Age 18–70 years<br>-inflammatory arthritis of at least 2 swollen joints lasting for 6 weeks to 6 months and with potential to evolve into RA<br>-no disease-modifying antirheumatic drugs or steroids<br>-2010 American College of Rheumatology /European League Against Rheumatism criteria for RA | -Risk of structural progression (change in the modified Sharp/van der Heijde score ≥1)<br>-Functional status (HAQ)<br>-EULAR response<br>-Rate of remission | Age, sex, joint erosion at inclusion, educational level, positivity for rheumatoid factor or anti-cyclic citrullinated peptide 2 antibodies, and shared HLA-DRB1 epitope | 641 | 1y      | Mean (SD): 48.43 (12.2) years    | Women: 77.8% | Current smokers: decreased risk of radiographic disease progression as compared with non-smokers OR = 0.50 (0.27–0.91), p=0.024<br>No association between smoking status and HAQ, EULAR response or rate of DAS28 remission (p > 0.05)<br>Effect of discontinuing smoking: this group did not differ in disease activity or severity scores from current smokers |
| Hetland et al., 2009 <sup>19</sup>   | Ever smokers, never smoker                                                                                                                                                                                         | Prospective cohort study (data from patients included in a RCT) | - American College of Rheumatology 1987 revised criteria for RA<br>-DMARD naïve<br>-active disease of 6 months' duration with at least two swollen joints<br>-age 18–75                                                                                                                              | Radiographic progression (change in Sharp/van der Heijde Score)                                                                                             | -                                                                                                                                                                        | 130 | 2 years | Median (IQR): 53.2 (43.5 – 62.7) | Women: 65%   | Ever smoker (vs never smoker)<br>Univariate analysis: Coefficient = -0.10 (-1.98 to 1.78), p= 0.92<br>Multivariate analysis: Coefficient = -0.43 (-3.17 to 2.32), p=0.76                                                                                                                                                                                         |

|                                      |                                                                                                                                                                                                                                                                      |                                                                 |                                                                                            |                                                                           |                                                                                                         |                              |         |                          |                  |                                                                                                                                                                                                                                                                                                                                                                                                                                                                                                                                                                                                                                                                                                                                                                                                                                                                        |
|--------------------------------------|----------------------------------------------------------------------------------------------------------------------------------------------------------------------------------------------------------------------------------------------------------------------|-----------------------------------------------------------------|--------------------------------------------------------------------------------------------|---------------------------------------------------------------------------|---------------------------------------------------------------------------------------------------------|------------------------------|---------|--------------------------|------------------|------------------------------------------------------------------------------------------------------------------------------------------------------------------------------------------------------------------------------------------------------------------------------------------------------------------------------------------------------------------------------------------------------------------------------------------------------------------------------------------------------------------------------------------------------------------------------------------------------------------------------------------------------------------------------------------------------------------------------------------------------------------------------------------------------------------------------------------------------------------------|
| Levitsky et al., 2017 <sup>20</sup>  | Current smokers, non-current smokers                                                                                                                                                                                                                                 | Prospective cohort study (data from patients included in a RCT) | -SWEFOT patients<br>-available baseline BMI                                                | EULAR non-remission (DAS28 $\geq$ 2.6)                                    | Age, current smoking, disease duration, baseline erosions, HAQ and ESR                                  | 403                          | 2 years | Median (IQR): 56 (45–64) | Women: 285 (71%) | Predictors of non-remission at 24 months<br>Current smokers (vs non-current smokers): OR=2.6 (1.1–6.3)                                                                                                                                                                                                                                                                                                                                                                                                                                                                                                                                                                                                                                                                                                                                                                 |
| Andersson et al., 2013 <sup>21</sup> | Snuff (smokeless tobacco) Questionnaire (“Do you use snuff? (yes/no).”) Patients used snuff only all along or previous smokers who had stopped smoking for at least 2 years before being included in the study and had continued to use snuff after stopping smoking | Nested case-control study                                       | -early RA<br>-disease duration of less or equal 2 years at inclusion<br>-over 18 years old | -Disease activity (DAS-28)<br>-Functional status (HAQ)<br>-EULAR response | Disease duration, number of previous DMARDs and biologics (grouped together), and socio-economic status | 51 patients and 145 controls | 5 years | Median: 55 (44-61)       | Men: 75%         | Snuff users compared with never smokers (adjusted analyses):<br>- DAS28: significantly lower DAS28 scores in snuff users at 3 months of follow-up (2.0 vs. 3.7, $p = 0.001$ ) and at 6 months (2.1 vs. 3.2, $p = 0.003$ )<br>- HAQ: only significant difference at 2 years but no differences in HAQ levels at any other time point (snuff users, 0.4 vs. 0.3 for never smokers; $p = 0.03$ )<br>- EULAR response (calculated from the DAS28 scores): no differences between snuff users and never smokers up to 1 year of follow-up<br>Snuff users compared with previous smokers (adjusted analyses):<br>- DAS28: significantly lower DAS28 values in snuff users at 3 months, 6 months, and 2 years<br>- HAQ: no differences in HAQ values at any time point<br>- EULAR response: no differences between snuff users and previous smokers up to 1 year of follow-up |

**Supplementary table 12 – Early rheumatoid arthritis and smoking: methodological quality of individual studies**

| Authors                                   | Study participation   | Study attrition       | Prognostic factor measurement | Outcome measurement           | Study confounding     | Statistical analysis and reporting | Quality  |
|-------------------------------------------|-----------------------|-----------------------|-------------------------------|-------------------------------|-----------------------|------------------------------------|----------|
| Andersson et al., 2012 <sup>9</sup>       | Low risk of bias      | Low risk of bias      | Low risk of bias risk of bias | Low risk of bias              | Moderate risk of bias | Low risk of bias                   | Moderate |
| Andersson et al., 2017 <sup>10</sup>      | Low risk of bias      | Low risk of bias      | Low risk of bias              | Low risk of bias              | Low risk of bias      | Moderate risk of bias              | High     |
| Bird et al., 2017 <sup>11</sup>           | Low risk of bias      | High risk of bias     | Low risk of bias              | Low risk of bias              | Low risk of bias      | Low risk of bias                   | Low      |
| Manfredsdottir et al., 2006 <sup>12</sup> | Low risk of bias      | High risk of bias     | Low risk of bias              | Low risk of bias              | Moderate risk of bias | Low risk of bias                   | Low      |
| McWilliamset al., 2012 <sup>13</sup>      | Low risk of bias      | High risk of bias     | Low risk of bias              | Low risk of bias              | Low risk of bias      | Low risk of bias risk of bias      | Low      |
| Nyhall-Wahlin et al., 2009 <sup>14</sup>  | Low risk of bias      | Low risk of bias      | Low risk of bias              | Low risk of bias              | Moderate risk of bias | Low risk of bias                   | Moderate |
| Papadopoulos et al., 2005 <sup>15</sup>   | Low risk of bias      | Low risk of bias      | Low risk of bias              | Low risk of bias              | Low risk of bias      | Low risk of bias                   | High     |
| Ruiz-Esquide et al., 2011 <sup>16</sup>   | Low risk of bias      | Moderate risk of bias | Low risk of bias              | Low risk of bias              | Low risk of bias      | Low risk of bias                   | Moderate |
| Saevarsdottir et al., 2015 <sup>17</sup>  | Low risk of bias      | Moderate risk of bias | Low risk of bias              | Low risk of bias              | Low risk of bias      | Low risk of bias                   | Moderate |
| Vesperini et al., 2013 <sup>18</sup>      | Low risk of bias      | High risk of bias     | Low risk of bias              | Low risk of bias              | Low risk of bias      | Low risk of bias                   | Low      |
| Hetland et al., 2009 <sup>19</sup>        | Low risk of bias      | Moderate risk of bias | Low risk of bias              | Low risk of bias              | Moderate risk of bias | Low risk of bias                   | Moderate |
| Levitsky et al., 2017 <sup>20</sup>       | Moderate risk of bias | Low risk of bias      | Low risk of bias              | Low risk of bias              | Low risk of bias      | Low risk of bias                   | Moderate |
| Andersson et al., 2013 <sup>21</sup>      | Low risk of bias      | Moderate risk of bias | Low risk of bias risk of bias | Low risk of bias risk of bias | Low risk of bias      | Moderate risk of bias              | Moderate |



## Supplementary table 13 – Rheumatoid arthritis and smoking: evidence from individual studies

| Author                             | Exposure detail                                                     | Study design             | Inclusion criteria                                                                                                                                          | Outcomes                                                                                                                                                                                                                                                                                                                                                                                                                                                                                                                               | Adjustment variables                         | Nb participants | Follow-up length      | Age                          | Gender    | Key findings                                                                                                                                                                                                                                                                                                                                                                                                                             |
|------------------------------------|---------------------------------------------------------------------|--------------------------|-------------------------------------------------------------------------------------------------------------------------------------------------------------|----------------------------------------------------------------------------------------------------------------------------------------------------------------------------------------------------------------------------------------------------------------------------------------------------------------------------------------------------------------------------------------------------------------------------------------------------------------------------------------------------------------------------------------|----------------------------------------------|-----------------|-----------------------|------------------------------|-----------|------------------------------------------------------------------------------------------------------------------------------------------------------------------------------------------------------------------------------------------------------------------------------------------------------------------------------------------------------------------------------------------------------------------------------------------|
| Crowson et al., 2018 <sup>22</sup> | Smoking status<br>Current smokers,<br>Former smokers, never smokers | Prospective cohort study | -patients with RA (based on physician diagnosis of RA and/or fulfillment of 1987 or 2010 American College of Rheumatology criteria for RA)<br>-no prior CVD | Fatal/non-fatal CVD events including acute coronary syndrome (ST-elevation and non-ST elevation myocardial infarction and unstable angina pectoris), chronic ischemic heart disease (stable angina pectoris), coronary revascularization (e.g., percutaneous coronary intervention and coronary artery bypass grafting), CVD death, cerebrovascular events (ischemic cerebrovascular accident and transient ischemic attack) and peripheral vascular events (with and without revascularization procedures, peripheral artery disease) | Age, CVD risk factors and RA characteristics | 5638            | mean follow-up of 5.8 | Mean (SD): 55.3 (14.0) years | 76% women | Smoking: strong predictors of CVD overall and among both sexes, even after adjustment for all other CVD risk factors<br>Adjusted hazard ratios for cardiovascular disease<br>Former vs never smokers:<br>Overall: HR = 1.43 (1.12, 1.83)<br>Women: HR = 1.36 (1.01, 1.82)<br>Men: HR = 1.75 (1.10, 2.79)<br>Current vs never smokers:<br>Overall: HR = 1.98 (1.52, 2.58)<br>Women: HR = 1.79 (1.28, 2.50)<br>Men: HR = 2.50 (1.56, 4.03) |

|                                   |                                                                                                                                                                                                                                                                                                 |                          |                                                                                        |                                                                                                                                                                              |                                                                                                                                                                                                    |      |             |                                                                                                            |                                                                              |                                                                                                                                                                                                                                                                                                                                                                                                                                                                                                                                                                                                                                                                                                                                                                                                                                                                                                                                                                          |
|-----------------------------------|-------------------------------------------------------------------------------------------------------------------------------------------------------------------------------------------------------------------------------------------------------------------------------------------------|--------------------------|----------------------------------------------------------------------------------------|------------------------------------------------------------------------------------------------------------------------------------------------------------------------------|----------------------------------------------------------------------------------------------------------------------------------------------------------------------------------------------------|------|-------------|------------------------------------------------------------------------------------------------------------|------------------------------------------------------------------------------|--------------------------------------------------------------------------------------------------------------------------------------------------------------------------------------------------------------------------------------------------------------------------------------------------------------------------------------------------------------------------------------------------------------------------------------------------------------------------------------------------------------------------------------------------------------------------------------------------------------------------------------------------------------------------------------------------------------------------------------------------------------------------------------------------------------------------------------------------------------------------------------------------------------------------------------------------------------------------|
| Finckh et al., 2007 <sup>23</sup> | Smokers or non-smokers based on current smoking status (patient's self-reported questionnaire) Patients discontinuing smoking or starting smoking during the observation period: categorised as smokers - "heavy smokers" (more than one pack/day) vs "moderate smokers" (one pack/day or less) | Prospective cohort study | - diagnosis of RA by a rheumatologist and at least two consecutive sets of radiographs | -progression of radiographic joint damage (Ratingen scores) -progression of functional disability                                                                            | Baseline damage scores, disease activity (DAS28), functional disability (HAQ), use of DMARDs and glucocorticoids, presence of rheumatoid factor, gender, age, disease duration and education level | 2004 | 3,1 years   | Mean (SD)<br>Non smokers : 56(13) years<br>Moderate smokers : 52(13) years<br>Heavy smokers : 51(10) years | Non smokers: 22% men<br>Moderate smokers: 32% men<br>Heavy smokers: 40% male | No evidence for more rapid progression of radiographic joint damage was seen among smokers compared to non-smokers: 2.79% (2.59–3.02) in non-smokers vs 2.51% (2.14–2.89) in smokers (p=0.26)<br>Radiographic erosions evolved significantly more slowly in heavy smokers than in non-smokers (p< 0.001)<br>Erosive disease in moderate smokers progressed at a rate similar to that in non-smokers (p=0.65)<br>Average progression of 1.21% (0.23–2.25) in heavy smokers, 2.71% (2.35–3.06) in moderate smokers and 2.86% (2.65–3.07) in non-smokers<br>-Evolution of HAQ scores did not differ significantly between smokers and non-smokers (p=0.35)<br>Heavy smokers tended to have more favourable HAQ scores than non-smokers, although the difference did not reach significance<br>At 2 years, heavy smokers improved their functional scores on average by –0.16 (–0.05;–0.27), moderate smokers by –0.10 (–0.06;–0.14) and non-smokers by –0.11 (–0.09;– 0.13) |
| Kim et al., 2018 <sup>24</sup>    | Passive smokers were defined as patients who were exposed to tobacco smoke that was exhaled by a smoker at home or in the workplace, according to their answer to                                                                                                                               | Prospective cohort study | -female RA patients who meet the revised criteria for RA                               | disease activity measures (swollen joint count (SJC), tender joint count (TJC), patient global estimate visual analog scale (VAS, mm), erythrocyte sedimentation rate (ESR), | -                                                                                                                                                                                                  | 191  | 17.3 months | Mean (SD): 59.1 (12.5) years                                                                               | Women: 100%                                                                  | $\Delta$ DAS28-ESR and $\Delta$ DAS28-CRP: significantly different between never and passive smokers (p=0.019 and p=0.023, respectively)<br><br>No significant differences of changes in disease activity indexes such as SJC, TJC, patient VAS, ESR, CRP, DAS28-ESR, and DAS28-CRP between passive smokers and current smokers (p>0.05 of all)<br>Disease activity of passive smokers not significantly changed (3.6±1.2 vs.                                                                                                                                                                                                                                                                                                                                                                                                                                                                                                                                            |

|                                    |                                                                                                                  |                            |                                                                                           |                                                                                                                                                        |                                                                                                                                                                                                                                                            |                                                 |                                                               |                                                                                                      |                                                                                 |                                                                                                                                                                                                                                                                         |
|------------------------------------|------------------------------------------------------------------------------------------------------------------|----------------------------|-------------------------------------------------------------------------------------------|--------------------------------------------------------------------------------------------------------------------------------------------------------|------------------------------------------------------------------------------------------------------------------------------------------------------------------------------------------------------------------------------------------------------------|-------------------------------------------------|---------------------------------------------------------------|------------------------------------------------------------------------------------------------------|---------------------------------------------------------------------------------|-------------------------------------------------------------------------------------------------------------------------------------------------------------------------------------------------------------------------------------------------------------------------|
|                                    | the question "Have you spent time with one or more people who have smoked indoors at home or in your workplace?" |                            |                                                                                           | mm/hour), and C-reactive protein level (CRP, mg/L), EULAR response                                                                                     |                                                                                                                                                                                                                                                            |                                                 |                                                               |                                                                                                      |                                                                                 | 3.7±1.5, p=0.830 for DAS28-ESR and 2.9±1.2 vs. 3.0±1.6, p=0.897 for DAS28-CRP, respectively)<br>No significant difference in treatment response based on EULAR response between never and passive smokers (p=0.171)                                                     |
| Kremers et al., 2008 <sup>25</sup> | Smoking status: current, never, passive, and ex-smoking<br>Current, former or never smokers                      | Retrospective cohort study | All RA subjects fulfilled the 1987 American College of Rheumatology (ACR) criteria for RA | Combined CV outcome comprised coronary revascularization procedures, silent or non-fatal myocardial infarctions (MI), heart failure (HF) and CV deaths | CV risk factors                                                                                                                                                                                                                                            | 553 RA subjects and 574 matched non-RA subjects | 14.7 years for RA subjects and 16.1 years for non-RA subjects | Mean: 57 years                                                                                       | Women: 73%                                                                      | Increased absolute risk for CV events in RA subjects compared with non-RA subjects apparent across all age groups and risk factor categories<br>Smoker 40-49 year old person: absolute risk of CV= 2.9% among non-RA subjects and 5.1% among RA subjects                |
| Lu et al., 2014 <sup>26</sup>      | Current, past or never smokers,<br>More or less than 10 pack-years                                               | Prospective cohort study   | RA patients who had HLA-SE genotype, and have been followed up annually, up to 7 years    | -disease activity (DAS28-CRP3)<br>-functional status (modified HAQ)                                                                                    | baseline DAS28-CRP3 or MHAQ, gender, age, race, education, seropositivity (anti-CCP antibody and/or rheumatoid factor positive), disease duration and body mass index, current drug treatments (corticosteroids, NSAIDs), non-biologic and biologic DMARDs | 662                                             | 4 years (median)                                              | Mean (SD)<br>Never smokers: 54.6 (14.3)<br>Past smokers: 61.2 (11.0)<br>Current smokers: 54.5 (11.4) | Women:<br>Never smokers: 83.0%<br>Past smokers: 82.4%<br>Current smokers: 78.6% | No significant associations between current smoking and DAS28-CRP3<br>Current smoking: increased MHAQ compared to never smoking in seropositive RA (0.46±0.04 vs. 0.37±0.02, p=0.05)<br>Consistent results were observed using pack-years to measure cumulative smoking |

|                                           |                                                                                                                                                                                                                                                                                                                                                                                                                   |                          |                                                                                                                                |                                                                                                           |                                                                                           |      |         |                                                                                   |                                                                   |                                                                                                                                                                                                                                                                                                                                                                                                                                                                                                                                                                                                                                                             |
|-------------------------------------------|-------------------------------------------------------------------------------------------------------------------------------------------------------------------------------------------------------------------------------------------------------------------------------------------------------------------------------------------------------------------------------------------------------------------|--------------------------|--------------------------------------------------------------------------------------------------------------------------------|-----------------------------------------------------------------------------------------------------------|-------------------------------------------------------------------------------------------|------|---------|-----------------------------------------------------------------------------------|-------------------------------------------------------------------|-------------------------------------------------------------------------------------------------------------------------------------------------------------------------------------------------------------------------------------------------------------------------------------------------------------------------------------------------------------------------------------------------------------------------------------------------------------------------------------------------------------------------------------------------------------------------------------------------------------------------------------------------------------|
| Quintana-Duque et al., 2017 <sup>27</sup> | Smoking status<br>2 categories based in the patient's self-reported questionnaire: Ever smokers (current and former smokers combined) and never smokers<br><br>Never smokers: had smoked < 100 cigarettes in their lifetime and were not current smokers<br>Former smokers: had to have quit at least 1 month before the study<br>Current smokers: continued to smoke or quit less than 1 month before the study. | Prospective cohort study | -disease duration < 12 months<br>-2010 American College of Rheumatology criteria for RA                                        | -disease activity, (DAS-28)<br>-disability (HAQ)<br>-radiographic progression (Sharp van der Heije score) | Age, gender, HLA typification and anti-cyclic citrullinated peptide antibodies positivity | 129  | 3 years | Mean (SD):<br>Never smokers: 45.5 (14.7) years<br>Ever smokers: 51.6 (13.6) years | Never smokers: 86 women (81.9%)<br>Ever smokers: 15 women (62.5%) | Ever smokers: less risk of disability (HAQ $\geq$ 0.5) than never smokers at 36 month<br>Ever vs. Never smokers: OR for HAQ $\geq$ 0.5 = 0.25 (0.06-0.97), p = 0.04<br>No evidence for more rapid progression of radiographic joint damage among smokers compared to non-smokers: OR = 1.4 (0.5-3.9)<br>At the end of follow-up, no significant statistical difference on disease activity between never and ever smokers: OR = 0.63 (0.26–1.51)<br>When excluding former smokers, never smokers compared to current smokers: higher disease activity according to DAS28 score<br>Current vs. never smokers: OR for DAS28 > 2.6 = 0.33 (0.1–0.99), p = 0.04 |
| Soderlin et al., 2011 <sup>28</sup>       | Never smokers, previous smokers, current smokers                                                                                                                                                                                                                                                                                                                                                                  | Prospective cohort study | $\geq$ 18 years of age<br>-disease duration $\leq$ 1 year<br>-1987 American College of Rheumatology RA classification criteria | -disease activity (DAS-28)<br>-functional status (HAQ)<br>-EULAR response                                 | -                                                                                         | 1587 | 1 year  | Mean (SD): 58 (15)                                                                | Women: 68%                                                        | Current smoking at inclusion in the study: independent negative prognostic factor for EULAR response<br>Current smokers (vs never smokers) At 3 months: OR=0.56 (0.41–0.77), p= 0.0001<br>At 6 months: 0.56 (0.41–0.77), p = 0.0001<br>At 1 year: OR = 0.69 (0.51–0.95), p= 0.02                                                                                                                                                                                                                                                                                                                                                                            |

|                                     |                                                  |                          |                                                                                                                        |                                                                           |      |        |                |                     |                                                                                                                                                                                                                                                                                                                                                                                                                                                                                                                                                                                                                                                                                                                                                                                                                                                                                                                                                                                                                                                                                                                                                                                                                                                                                                                                                                                                                         |
|-------------------------------------|--------------------------------------------------|--------------------------|------------------------------------------------------------------------------------------------------------------------|---------------------------------------------------------------------------|------|--------|----------------|---------------------|-------------------------------------------------------------------------------------------------------------------------------------------------------------------------------------------------------------------------------------------------------------------------------------------------------------------------------------------------------------------------------------------------------------------------------------------------------------------------------------------------------------------------------------------------------------------------------------------------------------------------------------------------------------------------------------------------------------------------------------------------------------------------------------------------------------------------------------------------------------------------------------------------------------------------------------------------------------------------------------------------------------------------------------------------------------------------------------------------------------------------------------------------------------------------------------------------------------------------------------------------------------------------------------------------------------------------------------------------------------------------------------------------------------------------|
| Soderlin et al., 2011 <sup>29</sup> | Never smokers, previous smokers, current smokers | Prospective cohort study | - ≥ 18 years of age<br>-disease duration ≤ 1 year<br>-1987 American College of Rheumatology RA classification criteria | -disease activity (DAS-28)<br>-functional status (HAQ)<br>-EULAR response | 1787 | 1 year | Mean: 58 years | Women: N=1207 (68%) | <p>Smokers: no significant improvement in change from baseline to 12 months in all of the individual components of the DAS28 (swollen joints, p = 0.33; tender joints, p = 0.53; ESR, p = 0.22; and VAS global, p = 0.52)</p> <p>Previous smokers: no significant improvement in change from baseline to 12 months in tender joints and VAS global when plotted against disease duration (tender joints, p = 0.07; VAS global, p = 0.05)</p> <p>Never-smokers: significant changes from baseline to 12 months plotted against disease duration for all the individual variables of the DAS28 (swollen joints, p = 0.001; tender joints, p = 0.0001; ESR, p = 0.0001; VAS global, p = 0.0001)</p> <p>Significant correlation between disease duration and difference from baseline in HAQ at 12 months for never-smokers and previous smokers, but not for current smokers (never-smokers, p = 0.0001; previous smokers, p = 0.004 ; and current smokers, p = 0.62)</p> <p>Current smokers (vs never and previous smokers): significantly less improvement in mean DAS28 from baseline to 12 months : p = 0.0001</p> <p>no significant differences in change for the mean values of CRP, pain, and HAQ: p = 0.202, 0.19, and 0.38, respectively</p> <p>At 12 months, significantly higher disease activity in current smokers ( vs never smokers and previous smokers): 18% vs. 11% and 12%, respectively, p = 0.005</p> |
|-------------------------------------|--------------------------------------------------|--------------------------|------------------------------------------------------------------------------------------------------------------------|---------------------------------------------------------------------------|------|--------|----------------|---------------------|-------------------------------------------------------------------------------------------------------------------------------------------------------------------------------------------------------------------------------------------------------------------------------------------------------------------------------------------------------------------------------------------------------------------------------------------------------------------------------------------------------------------------------------------------------------------------------------------------------------------------------------------------------------------------------------------------------------------------------------------------------------------------------------------------------------------------------------------------------------------------------------------------------------------------------------------------------------------------------------------------------------------------------------------------------------------------------------------------------------------------------------------------------------------------------------------------------------------------------------------------------------------------------------------------------------------------------------------------------------------------------------------------------------------------|

|                                     |                                                                                                                                                                                    |                            |                                                                                                                                                                |                                                                                                                                             |                                 |                                              |                                                                        |                      |                           |                                                                                                                                                                                                                                                                                                                                                                                                                                                                                                                                                                                                                                                                               |
|-------------------------------------|------------------------------------------------------------------------------------------------------------------------------------------------------------------------------------|----------------------------|----------------------------------------------------------------------------------------------------------------------------------------------------------------|---------------------------------------------------------------------------------------------------------------------------------------------|---------------------------------|----------------------------------------------|------------------------------------------------------------------------|----------------------|---------------------------|-------------------------------------------------------------------------------------------------------------------------------------------------------------------------------------------------------------------------------------------------------------------------------------------------------------------------------------------------------------------------------------------------------------------------------------------------------------------------------------------------------------------------------------------------------------------------------------------------------------------------------------------------------------------------------|
|                                     |                                                                                                                                                                                    |                            |                                                                                                                                                                |                                                                                                                                             |                                 |                                              |                                                                        |                      |                           | At 12 months, current smoking at baseline was an independent predictor of a poor EULAR response: OR = 0.69 (0.50-0.93), p = 0.02 <sup>⊠</sup><br>Similar data were obtained at 3 months (OR = 0.64, (0.47–0.87), p = 0.004) and 6 months (OR = 0.66, (0.48–0.91), p = 0.011)                                                                                                                                                                                                                                                                                                                                                                                                  |
| Westhoff et al., 2008 <sup>30</sup> | Smoking behaviour: age at the beginning of regular smoking, intermission and total years smoked as well as the average daily number of cigarettes currently smoked and in the past | Prospective cohort study   | -recent onset RA (according to the revised ACR criteria)<br>-age ≥ 18 years<br>-disease duration <24 months                                                    | -disease activity (ESR (mm/1 h), CRP (mg/l) and the 28-joint disease activity score (DAS28))<br>-radiographic joint damage (Ratingen score) | Age, sex, baseline DAS28 and RF | 896                                          | 3 years                                                                | Mean (SD): 56.5 (13) | Women: N (%) 630 (70.3)   | At 3 years, current smokers of both serological groups had slightly worse outcomes than never smokers of the same serological group (p=0.635 for RF+ patients and p = 0.003 for RF – patients)<br>No significant difference in CRP levels (p=0,211 for RF+ and p= 0,421 for RF- patients )<br>No influence of smoking on radiographic outcome (no matter which cut-off was chosen as dependent variable (RS >3 to >10) or how smoking was calibrated as an independent variable (current vs never smokers; past vs never smoker); or a combination of smoking status and PYs: former smokers </>20 PYs, current smokers </>20 PYs vs never smokers) in all serological groups |
| Gonzalez et al., 2008 <sup>31</sup> | Cigarette smoking status<br><br>Current, former, never smokers<br><br>Use of other tobacco products (eg, pipe, cigar) was not considered                                           | Retrospective cohort study | -1987 American College of Rheumatology criteria for RA<br>-between 1 January 1955 and 1 January 1995 among Rochester, Minnesota<br>-residents >18 years of age | Risk of developing selected CV events (myocardial infarction (MI), heart failure (HF) and CV death)                                         | Age, sex, and calendar year     | 603 subjects with RA and 603 non-RA subjects | The RA and non-RA subjects were followed for a mean of 15 and 17 years | Mean: 58 years       | Women: 73% in both groups | Current smoking associated with a higher risk of developing a CV outcome<br>HR = 1.32 (0.97-1.81)                                                                                                                                                                                                                                                                                                                                                                                                                                                                                                                                                                             |

|                                      |                                                                                                                                                                                                                                                               |                            |                                                                                                                                                                                                                                                                                       |                                                                                                |                                                                                                                                                                                                                                                                                                     |                                                                                                                                                                           |              |                                                                                |                                                    |                                                                                                                                                                                                                                                                                                                                                                                                                                                                                                      |
|--------------------------------------|---------------------------------------------------------------------------------------------------------------------------------------------------------------------------------------------------------------------------------------------------------------|----------------------------|---------------------------------------------------------------------------------------------------------------------------------------------------------------------------------------------------------------------------------------------------------------------------------------|------------------------------------------------------------------------------------------------|-----------------------------------------------------------------------------------------------------------------------------------------------------------------------------------------------------------------------------------------------------------------------------------------------------|---------------------------------------------------------------------------------------------------------------------------------------------------------------------------|--------------|--------------------------------------------------------------------------------|----------------------------------------------------|------------------------------------------------------------------------------------------------------------------------------------------------------------------------------------------------------------------------------------------------------------------------------------------------------------------------------------------------------------------------------------------------------------------------------------------------------------------------------------------------------|
| Joseph, M et al., 2017 <sup>32</sup> | Smoking status was defined as periods of never, former and current smoking and could vary throughout follow-up. For former smokers, the number of years of cessation was defined. This value was reset to 0 at the start of each new period of former smoking | Retrospective cohort study | - first diagnosed with RA within the study window<br>-aged 16 years or over at RA diagnosis                                                                                                                                                                                           | hospitalisations for cardiovascular events and respiratory infection                           | Gender, age, Townsend score, use of immunosuppressant disease-modifying antirheumatic drugs, use of oral glucocorticoids, use of non-steroidal anti-inflammatory drugs, type2 diabetes, use of cardiovascular drugs, use of aspirin/antiplatelet drugs, use of lipid regulators and body mass index | 5079                                                                                                                                                                      | 13 years max | Median age (IQR): 61.0 (50.9, 70.9)                                            | Women: 68.7%                                       | Risk of hospitalisations for CVE<br>Current smokers (vs never smokers): HR = 2.23 (1.46-3.40)<br>Current smokers (vs former smokers): HR = 1.51 (1.04-2.19)<br>Former smokers (vs never smokers): HR = 1.47 (1.04-2.08)<br>Effect on smoking cessation on risk of hospitalisations for CVE<br>Per year since cessation, light smoker : HR = 0.77 (0.66-0.91)<br>Per year since cessation, heavy smoker : HR = 0.73 (0.62-0.87)<br>Heavy vs light smoker (at the time of cessation): 1.80 (0.79-4.10) |
| Miyake et al., 2009 <sup>33</sup>    | Smoker vs non-smoker                                                                                                                                                                                                                                          | Retrospective cohort study | RA outpatients on NSAID medication for at least 3 months                                                                                                                                                                                                                              | development of peptic ulcers                                                                   | -                                                                                                                                                                                                                                                                                                   | 196                                                                                                                                                                       | 39 months    | Mean (SD): 61.9 (0.7) years                                                    | Women: N=173                                       | Smoking status associated with development of peptic ulcers in rheumatoid arthritis patients on long-term NSAIDs treatment<br>Smoker (vs non-smoker): OR = 2.71 (1.13–6.53), p=0.026                                                                                                                                                                                                                                                                                                                 |
| Baganz et al., 2018 <sup>34</sup>    | Tobacco use<br><br>Current, former or never smokers                                                                                                                                                                                                           | Prospective cohort study   | CAPEA: DMARD-naive RA patients starting the 1st csDMARD<br>- RABBIT: bDMARD-naive RA patients switching either to a 2nd csDMARD or to a TNFi after one previous csDMARD failure<br>- Both: at least moderate disease activity at baseline, defined by the disease activity score with | Achievement of low disease activity (DAS28 < 3.2) or remission (DAS28 < 2.6) within six months | Age, disease duration in years, DAS28>5.1, HAQ≥1.2, RF/ACPA positivity, erosions, BMI>30 kg/m2 and number of comorbidities (none, 1,≥2)                                                                                                                                                             | A total of 713 patients starting the 1st csDMARD (CAPEA), 1613 patients switching to the 2nd csDMARD therapy (RABBIT) and 388 patients switching to the 1st TNFi (RABBIT) | NA           | Mean (SD):<br>CAPEA: 57.1 (13.9)<br>RABBIT: 58.9 (12.7)<br>RABBIT: 55.6 (14.6) | Women: N(%)<br>442 (62)<br>1193 (74)<br>249 (64.2) | Achievement of low disease activity within six months:<br>Current smoking: OR= 0.71 (0.48-1.04) / 0.85 (0.66-1.10) / 1.04 (0.55-1.94)<br>Achievement of remission within six months:<br>Current smoking: OR= 0.67 (0.46-1.00) / 0.72 (0.53-0.97) / 0.75 (0.39-1.46)                                                                                                                                                                                                                                  |

|                                       |                                           |                           |                                                                                                                                                                                                                                                                                                                                                                          |                               |                                    |                                                                         |                            |                                                                     |                                                    |                                                                                                                                                                                                                                                                                                                                                                                              |
|---------------------------------------|-------------------------------------------|---------------------------|--------------------------------------------------------------------------------------------------------------------------------------------------------------------------------------------------------------------------------------------------------------------------------------------------------------------------------------------------------------------------|-------------------------------|------------------------------------|-------------------------------------------------------------------------|----------------------------|---------------------------------------------------------------------|----------------------------------------------------|----------------------------------------------------------------------------------------------------------------------------------------------------------------------------------------------------------------------------------------------------------------------------------------------------------------------------------------------------------------------------------------------|
| Doran et al., 2002 <sup>35</sup>      | Ever smokers vs never smokers             | Prospective cohort study  | 28 joints (DAS28)<br>3.2 and with at least one follow up visit<br>- computerized diagnostic index of the Rochester Epidemiology Project for any diagnosis of arthritis (excluding degenerative arthritis or osteoarthritis)<br>- ≥18 years of age<br>- diagnosis was confirmed or rejected based on the American College of Rheumatology 1987 diagnostic criteria for RA | Infection                     | -                                  | 609                                                                     | Mean follow-up: 12.7 years | Mean age at RA incidence: 58.0 years                                | Women: N(%)<br>445 (73.1)                          | Smoking: predictor of objectively confirmed infections (univariate analysis)<br>HR = 1.42 (1.10-1.84), p= 0.008<br>Non-predictor of infections requiring hospitalization (univariate analysis)<br>HR = 1.29 (0.98-1.70), p= 0.071                                                                                                                                                            |
| Mantel et al., 2015 <sup>36</sup>     | Never, current, past, non-regular smokers | Nested case-control study | - patients with incident RA between 18 and 70 years of age                                                                                                                                                                                                                                                                                                               | Risk of acute coronary events | Linear and quadratic effect of age | Cases (138) / Controls (624)                                            | NA                         | Mean (SD) age at diagnosis :<br>Case 60.8 (7.3) / Control 51.6 12.7 | Women: N(%)<br>case 59 (42.8) / control 277 (44.4) | Current smoking (vs never smoking): OR = 1.45 (0.78–2.70)<br>Past smoking (vs never smoking): OR = 1.77 (0.99–3.20)<br>Non-regular smoking (vs never smoking): OR = 1.71 (0.67–4.32)                                                                                                                                                                                                         |
| McWilliams et al., 2019 <sup>37</sup> | Ex-, current, never smokers               | Prospective cohort study  | -RA diagnostic by a consultant rheumatologist                                                                                                                                                                                                                                                                                                                            | Pain (SF-36)                  | -                                  | ERAN: 683 + BSRBR<br>BIOLOGICS<br>7,090 + BSRBR<br>NONBIOLOGICS<br>1720 | 3 years                    | Mean (SD)<br>57 (13)<br>57 (11)<br>61 (12)                          | Women:<br>66%<br>77%<br>75%                        | ERAN Persistent pain (vs low pain)<br>Current smokers: OR = 1.16 (0.52–2.56), p=0.717<br>Ex-smokers: OR = 4.65 (1.73–12.50), p=0.002<br>ERAN Persistent pain (vs resolving pain)<br>Current smokers: OR = 1.83 (1.05–3.18), p= 0.032<br>Ex-smokers: OR = 1.52 (0.86–2.67), p= 0.146<br>BSRBR Biologics Persistent pain (vs resolving pain)<br>Current smokers: OR = 1.72 (1.41–2.11), p<.001 |



|                                    |                                     |                          |                                                                                                                                                                                                      |                                                                                                        |                             |                                                      |                                                                                         |                                                                                    |                                                        |                                                                                                                                                                                                                                                                                                      |
|------------------------------------|-------------------------------------|--------------------------|------------------------------------------------------------------------------------------------------------------------------------------------------------------------------------------------------|--------------------------------------------------------------------------------------------------------|-----------------------------|------------------------------------------------------|-----------------------------------------------------------------------------------------|------------------------------------------------------------------------------------|--------------------------------------------------------|------------------------------------------------------------------------------------------------------------------------------------------------------------------------------------------------------------------------------------------------------------------------------------------------------|
|                                    |                                     |                          |                                                                                                                                                                                                      |                                                                                                        |                             |                                                      |                                                                                         |                                                                                    |                                                        | Ex-smokers: OR = 1.17 (1.00–1.37), p= 0.045<br>BSRBR Nonbiologics Persistent pain (vs resolving pain)<br>Current smokers: OR = 1.34 (0.89–2.02), p=0.156<br>Ex-smokers: OR = 1.64 (1.18–2.28), p= 0.003<br>Smoking (ever) (vs never): HR = 4.38 (2.14-8.99)                                          |
| Nannini et al., 2013 <sup>38</sup> | Ever vs never smokers               | Prospective cohort study | -RA first diagnosed between January 1, 1955 and January 1, 1994, among Rochester, Minnesota residents<br>-≥ 18 years of age<br>-1987 American College of Rheumatology classification criteria for RA | Development of obstructive lung disease                                                                | -                           | Patients with RA (N=594) Subjects without RA (N=596) | Mean (SD): Patients with RA 16.3 (10.5) years<br>Subjects without RA: 19.4 (11.1) years | Age at RA diagnosis/index date, mean (SD)<br>RA: 57.8 (15.2)<br>No RA: 58.2 (15.3) | Women : N (%)<br>RA: 435 (73.2%)<br>No RA: 438 (73.5%) |                                                                                                                                                                                                                                                                                                      |
| Rydell et al., 2018 <sup>39</sup>  | Current, previous and never smokers | Prospective cohort study | -RA diagnosed by a specialist in rheumatology<br>-1987 American College of Rheumatology classification criteria for RA<br>-duration of symptoms ≤ 12 months at the time of inclusion                 | Risk of rapid radiographic progression (increase of ≥ 5 points in Sharp–van der Heijde score per year) | RF and presence of erosions | 233                                                  | 5 years                                                                                 | Median (IQR) age at inclusion: 62 (52–70) years                                    | Women: N(%)<br>114 (70)                                | Current smokers (vs never smokers): OR = 2.92 (1.00-8.56)<br>Ever smokers (vs never smokers): OR = 2.69 (1.01-7.18)<br>Previous smoker (vs never smokers): OR = 2.50 (0.83-7.55)                                                                                                                     |
| Kiely et al., 2019 <sup>40</sup>   | Ever vs never smokers               | Prospective cohort study | ERAS:<br><2 years disease duration, no prior csDMARD therapy<br><br>ERAN:<br><3 years disease duration                                                                                               | Development of interstitial lung disease (RA-ILD)                                                      | -                           | 2701                                                 | ERAS:<br>median follow-up 10 years<br><br>ERAN:<br>median follow-up 6 years             | Age of RA onset<br><55: 1146 (42.4%)<br>56–64: 728 (27.0%)<br>65+: 827 (30.6%)     | Female 1808 66.9%                                      | RA-ILD onset after any conventional synthetic disease-modifying antirheumatic drugs exposure<br>Smoking (ever): OR = 2.21 (1.21-4.03), p= 0.01<br>RA-ILD onset prior to any conventional synthetic disease-modifying antirheumatic drugs exposure<br>Smoking (ever): OR = 1.91 (1.13-3.25), p= 0.016 |

|                                         |                                 |                          |                                                                                                                                  |                        |                |     |          |                    |            |                                                                                                                                                                                                                                                                                                                                                                                                                                                                                                                                                                                                                                                                                                                                                                                                                         |
|-----------------------------------------|---------------------------------|--------------------------|----------------------------------------------------------------------------------------------------------------------------------|------------------------|----------------|-----|----------|--------------------|------------|-------------------------------------------------------------------------------------------------------------------------------------------------------------------------------------------------------------------------------------------------------------------------------------------------------------------------------------------------------------------------------------------------------------------------------------------------------------------------------------------------------------------------------------------------------------------------------------------------------------------------------------------------------------------------------------------------------------------------------------------------------------------------------------------------------------------------|
| Verstappen et al., 2013 <sup>41</sup> * | Never, past and current smokers | Prospective cohort study | Consecutive patients aged over 16 years with early IP from the Norfolk Arthritis Register (NOAR) recruited between 1990 and 1994 | abnormal lung function | Age and gender | 421 | 15 years | Mean (SD): 62 (13) | Women: 68% | Current smoking at baseline: predictor of obstructive lung disease<br>Obstructive lung disease (OLD)<br>Current smokers (vs never)<br>OR = 15.25 (3.14-73.99)<br>Past smokers (vs never)<br>OR = 4.59 (0.99-21.33)<br>Restrictive lung disease (RLD)<br>Current smokers (vs never)<br>OR = 1.45 (0.59-3.56)<br>Past smokers (vs never)<br>OR = 0.64 (0.28-1.50)<br>Association with OLD at 15 y:<br>Current smoking at 15 y:<br>OR = 15.91 (3.00-84.3)<br>Past smoking: OR = 5.90 (1.32-26.4)<br>Association with RLD at 15 y:<br>Current smoking at 15 y:<br>OR = 2.01 (0.74-5.50)<br>Past smoking:<br>OR = 0.68 (0.30-1.51)<br>In patients who stopped smoking between baseline and the 15-year follow-up visit: non-significant reduced risk of having OLD with longer cessation time (OR = 0.98, 95% CI 0.94 -1.02) |
|-----------------------------------------|---------------------------------|--------------------------|----------------------------------------------------------------------------------------------------------------------------------|------------------------|----------------|-----|----------|--------------------|------------|-------------------------------------------------------------------------------------------------------------------------------------------------------------------------------------------------------------------------------------------------------------------------------------------------------------------------------------------------------------------------------------------------------------------------------------------------------------------------------------------------------------------------------------------------------------------------------------------------------------------------------------------------------------------------------------------------------------------------------------------------------------------------------------------------------------------------|

---

\*Inflammatory polyarthritis

**Supplementary table 14 – Rheumatoid arthritis and smoking: methodological quality of individual studies**

| Authors                                   | Study participation   | Study attrition       | Prognostic factor measurement | Outcome measurement   | Study confounding     | Statistical analysis and reporting | Quality  |
|-------------------------------------------|-----------------------|-----------------------|-------------------------------|-----------------------|-----------------------|------------------------------------|----------|
| Crowson et al., 2018 <sup>22</sup>        | Moderate risk of bias | High risk of bias     | Low risk of bias              | Low risk of bias      | Low risk of bias      | Low risk of bias                   | Low      |
| Finckh et al., 2007 <sup>23</sup>         | Low risk of bias      | Moderate risk of bias | Low risk of bias              | Low risk of bias      | Low risk of bias      | Low risk of bias                   | Moderate |
| Kim et al., 2018 <sup>24</sup>            | Low risk of bias      | Moderate risk of bias | Low risk of bias              | Low risk of bias      | High risk of bias     | Low risk of bias                   | Low      |
| Kremers et al., 2008 <sup>25</sup>        | Low risk of bias      | Moderate risk of bias | Low risk of bias              | Low risk of bias      | Low risk of bias      | Low risk of bias                   | Moderate |
| Lu et al., 2014 <sup>26</sup>             | Low risk of bias      | Moderate risk of bias | Low risk of bias              | Low risk of bias      | Low risk of bias      | Low risk of bias                   | Moderate |
| Quintana-Duque et al., 2017 <sup>27</sup> | Low risk of bias      | High risk of bias     | Low risk of bias              | Low risk of bias      | Low risk of bias      | Low risk of bias                   | Low      |
| Soderlin et al., 2011 <sup>28</sup>       | Low risk of bias      | High risk of bias     | Low risk of bias              | Low risk of bias      | moderate risk of bias | Low risk of bias                   | Low      |
| Soderlin et al., 2011 <sup>29</sup>       | Low risk of bias      | High risk of bias     | Low risk of bias              | Low risk of bias      | moderate risk of bias | Low risk of bias                   | Low      |
| Westhoff et al., 2008 <sup>30</sup>       | Low risk of bias      | Moderate risk of bias | Low risk of bias              | Low risk of bias      | Low risk of bias      | Low risk of bias                   | Moderate |
| Gonzalez et al., 2008 <sup>31</sup>       | Low risk of bias      | Low risk of bias      | Low risk of bias              | Low risk of bias      | moderate risk of bias | Low risk of bias                   | Moderate |
| Joseph, M et al., 2017 <sup>32</sup>      | Low risk of bias      | Moderate risk of bias | Low risk of bias              | Low risk of bias      | Low risk of bias      | Low risk of bias                   | Moderate |
| Miyake et al., 2009 <sup>33</sup>         | Moderate risk of bias | Low risk of bias      | Low risk of bias              | Low risk of bias      | Moderate risk of bias | Low risk of bias                   | Moderate |
| Baganz et al., 2018 <sup>34</sup>         | Moderate risk of bias | Moderate risk of bias | Moderate risk of bias         | Moderate risk of bias | Moderate risk of bias | Low risk of bias                   | Moderate |
| Doran et al., 2002 <sup>35</sup>          | Low risk of bias      | High risk of bias     | Low risk of bias              | Low risk of bias      | Low risk of bias      | Low risk of bias                   | Low      |
| Mantel et al., 2015 <sup>36</sup>         | Low risk of bias      | Low risk of bias      | Low risk of bias              | Low risk of bias      | Low risk of bias      | Low risk of bias                   | High     |
| McWilliams et al., 2019 <sup>37</sup>     | Moderate risk of bias | High risk of bias     | Low risk of bias              | Low risk of bias      | Low risk of bias      | Low risk of bias                   | Low      |
| Nannini et al., 2013 <sup>38</sup>        | Low risk of bias      | High risk of bias     | Low risk of bias              | Low risk of bias      | Low risk of bias      | Low risk of bias                   | Low      |
| Rydell et al., 2018 <sup>39</sup>         | Low risk of bias      | Moderate risk of bias | Low risk of bias              | Low risk of bias      | Low risk of bias      | Low risk of bias                   | Moderate |
| Kiely et al., 2019 <sup>40</sup>          | Low risk of bias      | Low risk of bias      | Low risk of bias              | Low risk of bias      | Moderate risk of bias | Low risk of bias                   | Moderate |
| Verstappen et al., 2013 <sup>41</sup>     | Low risk of bias      | Low risk of bias      | Low risk of bias              | Low risk of bias      | Low risk of bias      | Low risk of bias                   | High     |

**Supplementary table 15 – Systemic lupus erythematosus and smoking: evidence from systematic reviews**

| Author (date)                               | Type of review | Study type included | Outcomes                    | Smoking associated with worse outcome | Key findings (negative MD/SMD favours intervention)                                                                                                                                                                                                                                | AMSTAR2  |
|---------------------------------------------|----------------|---------------------|-----------------------------|---------------------------------------|------------------------------------------------------------------------------------------------------------------------------------------------------------------------------------------------------------------------------------------------------------------------------------|----------|
| Andrades et al., 2017 <sup>42</sup>         | SR             | Observational       | Cardiovascular risk factors | Cardiovascular risk factors: ✓        | Cardiovascular risk factors: smoking cessation is recommended, although further research is needed to study the association between smoking and cardiovascular risk factors                                                                                                        | Moderate |
| Montes et al., 2016 <sup>43</sup>           | SR             | Observational       | SLEDAI                      | SLEDAI: ✗                             | SLEDAI: 2 cross-sectional studies assessed the association between smoking and SLEDAI, 1 reported an association. Authors conclude that the evidence is not strong enough to make conclusions                                                                                      | Moderate |
| Rodriguez Huerta et al., 2016 <sup>44</sup> | SR             | Observational       | SLEDAI, Rash, SF-36         | SLEDAI: ✓<br>Rash: ✓<br>SF-36: ✓      | SLEDAI: 3/4 studies reported an association between smoking and worse SLEDAI. Also higher duration/intensity associated with worse SLEDAI<br>Rash: active smokers had increased risk of rash<br>SF-36: 1 study reported smokers had worse scores on mental and physical components | Moderate |

AMSTAR2 = Assessing the Methodological Quality of Systematic Reviews 2, MA = meta-analysis, RR = relative risk, SLEDAI = systemic lupus erythematosus disease activity index, SR = systematic review

**Supplementary table 16 – Systemic lupus erythematosus and smoking: evidence from individual studies**

| Author                               | Exposure detail                             | Study design              | Inclusion criteria                                                                                                                                                                                                                                                         | Outcomes                                                    | Adjustment variables                                                                | Nb participants                                  | Follow-up length | Age                                                             | Gender                                                                 | Key findings                                                                                                                                                                                                                                         |
|--------------------------------------|---------------------------------------------|---------------------------|----------------------------------------------------------------------------------------------------------------------------------------------------------------------------------------------------------------------------------------------------------------------------|-------------------------------------------------------------|-------------------------------------------------------------------------------------|--------------------------------------------------|------------------|-----------------------------------------------------------------|------------------------------------------------------------------------|------------------------------------------------------------------------------------------------------------------------------------------------------------------------------------------------------------------------------------------------------|
| Bengtsson et al., 2012 <sup>45</sup> | Smoking habits<br>Ever smokers, non-smokers | Prospective cohort study  | - at least 4 of the 1982 SLE ACR classification criteria<br>-being willing and able to be assessed clinically and by laboratory analyses for disease activity according to the SLE Disease Activity Index (SLEDAI) and for organ damage with the SLICC/ACR-DI SLE patients | Cardiovascular events (myocardial infarction and/or stroke) | myocardial infarction and/or angina pectoris with intervention                      | 774                                              | 7 years          | Mean: 49 years                                                  | Women: 85%                                                             | Smoking, ever (vs non-smoking)<br>Unadjusted HR = 1.14 (0.52–2.51)<br>Adjusted HR = 0.65 (0.27–1.55)                                                                                                                                                 |
| Bernatsky et al., 2008 <sup>46</sup> | Ever, never smokers                         | Nested case-control study | SLE patients                                                                                                                                                                                                                                                               | Cancer risk                                                 | Age, sex, race/ethnicity, calendar year at cohort entry, and geographical residence | 246 cancer cases and 538 controls without cancer | NA               | Cancer group: median=47 years<br>Control group: median=46 years | Women: N (%)<br>Cancer group: 49 (96.08)<br>Control group: 192 (94.12) | Adjusted hazard ratio (HR) estimates for cancer occurrence:<br>Tobacco use (ever vs never smoker): HR = 0.81 (0.56–1.18)<br>Adjusted Hr estimates for haematological cancer occurrence:<br>Tobacco use (ever vs never smoker): HR = 0.79 (0.54–1.15) |
| Bernatsky et al., 2018 <sup>47</sup> | Ever smoker or not                          | Prospective cohort study  | - lung cancers occurring after entry into the SLE cohort and up to the time of cohort exit                                                                                                                                                                                 | Lung cancer risk                                            | time-dependent cumulative disease activity, any prior record of pulmonary fibrosis  | 4987                                             | NA               | Mean: 38 years                                                  | Men: 9%                                                                | Hazard ratio estimates for lung cancer:<br>Unadjusted HR = 6.92 (2.87–16.7)<br>Adjusted HR = 6.35 (2.43–16.6)                                                                                                                                        |
| Bertoli et al., 2009 <sup>48</sup>   | Current smoking: yes vs no                  | Prospective cohort study  | - American College of                                                                                                                                                                                                                                                      | Arterial vascular events (myocardial infarction, angina)    | -                                                                                   | N=1333 Northwestern University                   | NA               | Mean (SD): 35.7 (12.3)                                          | Women: %<br>90.4%                                                      | Univariate analysis:<br>Current smoking: HR = 2.06 (1.39–3.05), p < 0.001                                                                                                                                                                            |

|                                           |                                         |                          |                                                                                                                                                                                                       |                                                                                                                                                                                                                                                    |   |                                                                                                                                                                                                          |                                                                                             |                              |            |                                                                                                        |
|-------------------------------------------|-----------------------------------------|--------------------------|-------------------------------------------------------------------------------------------------------------------------------------------------------------------------------------------------------|----------------------------------------------------------------------------------------------------------------------------------------------------------------------------------------------------------------------------------------------------|---|----------------------------------------------------------------------------------------------------------------------------------------------------------------------------------------------------------|---------------------------------------------------------------------------------------------|------------------------------|------------|--------------------------------------------------------------------------------------------------------|
|                                           |                                         |                          | Rheumatology (ACR)<br>-16 years of age or older<br>-disease<br>duration ≤10 years                                                                                                                     | pectoris and/or a vascular procedure for myocardial infarction (coronary artery bypass graft), cerebral vascular accident and claudication lasting ≥ six months and/or evidence of gangrene or significant tissue loss (loss of a digit or a limb) |   | (N=175), Johns Hopkins University (N=528), The University of Alabama at Birmingham (N=299), The University of Texas Health Science Center at Houston (N=229), and The University of Puerto Rico (N=102). |                                                                                             |                              |            | Multivariate analysis:<br>Current smoking: HR = 2.20 (1.40-3.46), p < 0.001                            |
| Burgos et al., 2010 <sup>49</sup>         | Current smoking or not (self reporting) | Prospective cohort study | - ACR criteria for the classification of SLE<br>-disease<br>duration of 45 years<br>-16 years of age<br>-defined ethnicity<br>-living in the geographic recruitment area of the participating centres | Thrombotic events (arterial [myocardial infarction, angina, stroke, intermittent claudication or peripheral arterial thrombosis (or both)] or venous [visceral or peripheral (or both)])                                                           | - | 643                                                                                                                                                                                                      | Mean: 4.6 (3.5) years                                                                       | Mean: 36.4 years             | Women: 90% | Smoking:<br>Univariate OR = 1.80 (1.04-3.11), p= 0.036<br>Multivariate OR = 1.85 (1.01-3.40), p= 0.048 |
| Calvo-Alen, G. et al., 2006 <sup>50</sup> | Current smoking or not                  | Prospective cohort study | Patients with SLE of Hispanic, African American, and Caucasian ethnicity from LUMINA, a multiethnic, longitudinal study                                                                               | Vascular events (cardiovascular, cerebrovascular, peripheral vascular)                                                                                                                                                                             | - | 400                                                                                                                                                                                                      | Patients who had a vascular event: 4,6 years<br>Those who had not vascular event: 3.8 years | Mean (SD): 37.0 (12.4) years | Women: 90% | Patients with vascular event: more likely to be smokers 25.0% vs 13.1%; p = 0.0274                     |

|                                    |                                                                                                     |                            |                                                                                                                                                                                                           |                                                                                                                                                                     |                                                                                                                          |     |                                    |                                            |                  |                                                                                                                                                                                                                                                                                                |
|------------------------------------|-----------------------------------------------------------------------------------------------------|----------------------------|-----------------------------------------------------------------------------------------------------------------------------------------------------------------------------------------------------------|---------------------------------------------------------------------------------------------------------------------------------------------------------------------|--------------------------------------------------------------------------------------------------------------------------|-----|------------------------------------|--------------------------------------------|------------------|------------------------------------------------------------------------------------------------------------------------------------------------------------------------------------------------------------------------------------------------------------------------------------------------|
| Ho et al., 2005 <sup>51</sup>      | Smokers: yes, no                                                                                    | Prospective cohort study   | - four of the American College of Rheumatology criteria for the classification of SLE<br>- disease duration of 5 years at baseline<br>- live within the catchment areas of the participating institutions | Thrombotic events (myocardial infarction, angina, stroke, intermittent claudication and/or peripheral arterial thrombosis)                                          | -                                                                                                                        | 442 | Mean follow-up 88.4 months         | NA                                         | NA               | Patients with thrombotic event: more likely to be smokers<br>OR = 2.642 (1.248–5.593), p= 0.0112<br>Adjusted OR = 2.777 (1.317–5.852), p= 0.0073                                                                                                                                               |
| Legge et al., 2016 <sup>52</sup>   | Current, past, never smoking                                                                        | Prospective cohort study   | - American College of Rheumatology criteria for SLE                                                                                                                                                       | Time to first change in SDI score (progression of cumulative organ damage)                                                                                          | -                                                                                                                        | 273 | Mean (SD): 7.3 (4.3) years         | Mean (SD): 44.1 (14.6) years               | Women: 87.2%     | Past or current smoking (vs never):<br>Unadjusted HR = 2.07 (1.37-2.98), p< 0.001<br>Adjusted HR = 1.69 (1.1-2.6), p= 0.02                                                                                                                                                                     |
| Turchin et al., 2009 <sup>53</sup> | Current smoking (i.e., whether or not the subject smoked at the time of the last clinic assessment) | Prospective cohort study   | - revised American College of Rheumatology criteria for SLE                                                                                                                                               | Cutaneous damage (alopecia; extensive scarring; and skin ulceration) (SLICC/ACR DI)<br>Cutaneous features of active lupus (rash, oral ulcers, alopecia) (SLEDAI-2K) | age, sex, race, lupus disease duration, antimalarial or immunosuppressant use, and anti-DNA and anti-SSA antibody status | 276 | NA                                 | Mean (SD): 45.1 (15.0) years               | Women: 92%       | Current smoking & SLICC/ACR DI:<br>Total cutaneous: OR = 2.73 (1.10-6.81)<br>Alopecia: OR = 1.95 (0.75-5.06)<br>Scarring: OR = 4.70 (1.04-21.18)<br><br>Current smoking & SLEDAI-2K:<br>Total cutaneous OR=1.83 (0.69-4.89)<br>Alopecia: OR = 1.08 (0.27-4.38)<br>Rash: OR = 6.18 (1.63-23.40) |
| Enomoto et al., 2019 <sup>54</sup> | Current, ex, never smokers                                                                          | Retrospective cohort study | Patients with SLE and thoracic diseases who had been treated in respiratory departments and thoroughly evaluated those with SLE-related                                                                   | Systemic lupus erythematosus-related interstitial pneumonia                                                                                                         | Age                                                                                                                      | 55  | Mean observation period: 85 months | Median age at diagnosis (IQR): 54 (13, 79) | Men/women: 13/42 | Current smokers (vs ex and never): significantly worse prognoses (log-rank, p = 0.001)<br>Current smoker: HR = 6.689 (No CI available), p = 0.018<br>HR adjusted for age:<br>Current smoker: HR = 6.105, p = 0.027                                                                             |

|                                         |                       |                            |                                                                                                                                                                                                                                                                     |                                                                                                                                                                                                                                                                                                                                                               |     |      |                                           |                                |              |                                                                                                                                                                                                                                                                                                               |
|-----------------------------------------|-----------------------|----------------------------|---------------------------------------------------------------------------------------------------------------------------------------------------------------------------------------------------------------------------------------------------------------------|---------------------------------------------------------------------------------------------------------------------------------------------------------------------------------------------------------------------------------------------------------------------------------------------------------------------------------------------------------------|-----|------|-------------------------------------------|--------------------------------|--------------|---------------------------------------------------------------------------------------------------------------------------------------------------------------------------------------------------------------------------------------------------------------------------------------------------------------|
|                                         |                       |                            | interstitial pneumonia                                                                                                                                                                                                                                              |                                                                                                                                                                                                                                                                                                                                                               |     |      |                                           |                                |              |                                                                                                                                                                                                                                                                                                               |
| Rua-Figueroa et al., 2017 <sup>55</sup> | Tobacco use           | Retrospective cohort study | Patients from the RELESSER-registry who met at least 4 ACR-97 SLE criteria                                                                                                                                                                                          | Severe infections                                                                                                                                                                                                                                                                                                                                             | -   | 3658 | Mean follow-up (SD): 120.2 (787.6) months | Median age: 32.9 years         | Women: 90%   | Bivariate analysis<br>Tobacco smoking (any history) RR = 1.35(1.06–1.73), p=0.018<br>Multivariate analysis<br>Tobacco (any use): HR= 1.332 (1.121-1.583)                                                                                                                                                      |
| Toloza et al., <sup>56</sup>            | NA                    | Prospective cohort study   | Patients with SLE according to the American College of Rheumatology criteria - disease duration of 5 years - defined ethnicity (all 4 grandparents of the same ethnicity as the patient) - live in the geographic catchment areas of the participating institutions | Cardiovascular (myocardial infarction and/or definite or classic angina and/or the undergoing of a vascular procedure for myocardial infarction [coronary artery bypass graft]), cerebrovascular (stroke) and peripheral vascular (arterial claudication and/or gangrene or significant tissue loss and/or arterial thrombosis in peripheral arteries) events | -   | 546  | Median follow-up: 73.8 months             | Mean (SD): 36.5 (12.3) years   | Women: 89.6% | Predictors of the occurrence of vascular events (multivariable logistic regression analyses)<br>Smoking: OR = 3.731 (1.391–10.000), p= 0.009<br>Predictors of the occurrence of vascular events (multivariable Cox proportional hazards regression analyses)<br>Smoking: HR = 2.596 (1.043–6.463), p = 0.0404 |
| Gustafsson et al., 2009 <sup>57</sup>   | Ever vs never smoking | Prospective cohort study   | All SLE patients at the Department of Rheumatology, Karolinska University Hospital who fulfilled four or more of the 1982 revised American College of Rheumatology                                                                                                  | Coronary artery disease (angina pectoris, myocardial infarction, or cardiac sudden death)                                                                                                                                                                                                                                                                     | Age | 182  | 8 years                                   | Median (IQR): 45 (31-53) years | Men: 10%     | Baseline smoking status: predictor of the first ever cardiovascular event (age-adjusted Cox regression models)<br>Smoking, ever: HR= 2.62 (1.11-7.03), p=0.03                                                                                                                                                 |



|                                      |                             |                          | Criteria for classification of SLE during the inclusion period (1995-99)                                                                                                                 |                                                                                                 |   |      |                           |                                                                          |                                |                                                                                                                                                                                                                                                                                                                                                                                            |
|--------------------------------------|-----------------------------|--------------------------|------------------------------------------------------------------------------------------------------------------------------------------------------------------------------------------|-------------------------------------------------------------------------------------------------|---|------|---------------------------|--------------------------------------------------------------------------|--------------------------------|--------------------------------------------------------------------------------------------------------------------------------------------------------------------------------------------------------------------------------------------------------------------------------------------------------------------------------------------------------------------------------------------|
| Julian, C et al., 2011 <sup>58</sup> | Current, ever, never smoker | Prospective cohort study | SLE diagnosis confirmed by medical chart review prior to enrolment, using American College of Rheumatology criteria                                                                      | Depression (CES-D)                                                                              | - | 663  | 1 year                    | Age 20-39<br>195 (29%)<br>Age 40-59<br>347 (52%)<br>Age 60+<br>121 (18%) | Women<br>N(%): 589<br>(90)     | Univariate analysis:<br>History of smoking OR=1.1 (0.8-1.5)<br>Model with traditional cardiovascular risk factors + demographics and depressive symptoms: OR = 1.2 (0.9-1.7)<br>Model with SLE-specific characteristics + demographics + depressive symptoms and traditional cardiovascular risk and disease related factors:<br>OR = 1.3 (0.9-1.8)<br>Smoking, ever<br>OR = 0.9 (0.3-2.2) |
| Petri et al. 1992 <sup>59</sup>      | Ever, never smokers         | Prospective cohort study | - clinical diagnosis of SLE by a faculty (board-certified) rheumatologist<br>- four or more of the revised criteria of the American Rheumatism Association for the classification of SLE | Coronary artery disease (CAD) (angina pectoris, myocardial infarction, or cardiac sudden death) | - | 229  | NA                        | Mean (SD) at entry into cohort<br>CAD+: 47.1 (11.8)<br>CAD-: 34.7 (11.2) | Men<br>CAD+: 21%<br>CAD-: 7.6% |                                                                                                                                                                                                                                                                                                                                                                                            |
| Urowitz et al., 2016 <sup>60</sup>   | Ever, never smokers         | Prospective cohort study | - SLE diagnosis within the last 15 months<br>- four or more American College of Rheumatology criteria for the                                                                            | Early myocardial infarction                                                                     | - | 1848 | Mean follow-up: 8.9 years | Mean (SD) at diagnosis:<br>34.7 (13.3) years                             | Women<br>N(%): 1640<br>(88.8)  | Univariate analysis:<br>Smoking, ever: OR = 6.85 (2.53-18.52)<br>Multivariable analysis<br>Smoking, ever: OR = 7.50 (2.38-23.57)                                                                                                                                                                                                                                                           |

---

|                                   |                  |                             |                                                             |               |     |     |    |                               |            |                                                                                                                  |
|-----------------------------------|------------------|-----------------------------|-------------------------------------------------------------|---------------|-----|-----|----|-------------------------------|------------|------------------------------------------------------------------------------------------------------------------|
|                                   |                  |                             | classification of<br>SLE                                    |               |     |     |    |                               |            |                                                                                                                  |
| Dey et al.,<br>2018 <sup>61</sup> | Smoking: yes, no | Prospective<br>cohort study | - pre-existing<br>confirmed<br>clinical<br>diagnosis of SLE | Fracture risk | Age | 150 | NA | Age at<br>scan: 50.1<br>years | Women: 141 | Crude<br>Smoking: OR= 2.484 (1.17-5.32),<br>p= 0.012<br>Adjusted<br>Smoking: OR = 2.770 (1.34-5.72),<br>p= 0.006 |

---

**Supplementary table 17 – Systemic lupus erythematosus and smoking: methodological quality of individual studies**

| Authors                                   | Study participation   | Study attrition       | Prognostic factor measurement | Outcome measurement   | Study confounding     | Statistical analysis and reporting | Quality  |
|-------------------------------------------|-----------------------|-----------------------|-------------------------------|-----------------------|-----------------------|------------------------------------|----------|
| Bengtsson et al., 2012 <sup>45</sup>      | Moderate risk of bias | Low risk of bias      | Low risk of bias              | Low risk of bias      | Low risk of bias      | Moderate risk of bias              | Moderate |
| Bernatsky et al., 2008 <sup>46</sup>      | Low risk of bias      | Low risk of bias      | Low risk of bias              | Low risk of bias      | Moderate risk of bias | Low risk of bias                   | Moderate |
| Bernatsky et al., 2018 <sup>46</sup>      | Moderate risk of bias | High risk of bias     | Moderate risk of bias         | Moderate risk of bias | Low risk of bias      | Low risk of bias                   | Low      |
| Bertoli et al., 2009 <sup>48</sup>        | Low risk of bias      | High risk of bias     | Low risk of bias              | Low risk of bias      | Low risk of bias      | Low risk of bias                   | Low      |
| Burgos et al., 2010 <sup>49</sup>         | Low risk of bias      | High risk of bias     | Low risk of bias              | Low risk of bias      | Low risk of bias      | Low risk of bias                   | Low      |
| Calvo-Alen, G. et al., 2006 <sup>50</sup> | Low risk of bias      | High risk of bias     | Low risk of bias              | Low risk of bias      | High risk of bias     | Low risk of bias                   | Low      |
| Ho et al., 2005 <sup>51</sup>             | Low risk of bias      | High risk of bias     | Low risk of bias              | Low risk of bias      | Low risk of bias      | Low risk of bias                   | Low      |
| Legge et al., 2016 <sup>52</sup>          | Low risk of bias      | Moderate risk of bias | Low risk of bias              | Low risk of bias      | Low risk of bias      | Low risk of bias                   | Moderate |
| Turchin et al., 2009 <sup>53</sup>        | Moderate risk of bias | High risk of bias     | Moderate risk of bias         | Moderate risk of bias | Low risk of bias      | Low risk of bias                   | Low      |
| Enomoto et al., 2019 <sup>54</sup>        | Moderate risk of bias | Low risk of bias      | Low risk of bias              | Low risk of bias      | Low risk of bias      | Low risk of bias                   | Moderate |
| Rua-Figueroa et al., 2017 <sup>55</sup>   | Moderate risk of bias | Low risk of bias      | Low risk of bias              | Low risk of bias      | Low risk of bias      | Low risk of bias                   | Moderate |
| Tolozza et al., <sup>56</sup>             | Low risk of bias      | High risk of bias     | Low risk of bias              | Low risk of bias      | Moderate risk of bias | Low risk of bias                   | Low      |
| Gustafsson et al., 2009 <sup>57</sup>     | Low risk of bias      | High risk of bias     | Low risk of bias              | Low risk of bias      | Moderate risk of bias | Low risk of bias                   | Low      |
| Julian, C et al., 2011 <sup>58</sup>      | Low risk of bias      | High risk of bias     | Low risk of bias              | Low risk of bias      | Low risk of bias      | Low risk of bias                   | Low      |
| Petri et al. 1992 <sup>59</sup>           | Low risk of bias      | High risk of bias     | Low risk of bias              | Low risk of bias      | Low risk of bias      | Low risk of bias                   | Low      |
| Urowitz et al., 2016 <sup>60</sup>        | Low risk of bias      | High risk of bias     | Low risk of bias              | Low risk of bias      | Low risk of bias      | Low risk of bias                   | Low      |
| Dey et al., 2018 <sup>61</sup>            | Moderate risk of bias | High risk of bias     | Low risk of bias              | Low risk of bias      | Moderate risk of bias | Low risk of bias                   | Low      |

**Supplementary table 18 – Axial spondyloarthritis and smoking: evidence from systematic reviews**

| Author (date)                                | Type of review | Study type included               | Outcomes                                                                    | Smoking associated with worse outcome                                                                   | Key findings (negative MD/SMD favours intervention)                                                                                                                                                                                                                                                                                                                                                                                                                                                                                                                                                      | AMSTAR2  |
|----------------------------------------------|----------------|-----------------------------------|-----------------------------------------------------------------------------|---------------------------------------------------------------------------------------------------------|----------------------------------------------------------------------------------------------------------------------------------------------------------------------------------------------------------------------------------------------------------------------------------------------------------------------------------------------------------------------------------------------------------------------------------------------------------------------------------------------------------------------------------------------------------------------------------------------------------|----------|
| Villaverde-Garcia et al., 2017 <sup>62</sup> | SR             | X-sectional, case-control, cohort | Pain, function, morning stiffness, disease activity, structural damage, QoL | Pain: ✓<br>Function: ✓<br>Morning stiffness: ✗<br>Disease activity: ✓<br>Structural damage: ✓<br>QoL: ✓ | Pain: 2/3 X-sectional studies reported higher pain in smokers compared to never smokers<br>Function: Current smoking associated with higher disability and ever smoking was associated with higher disability in 5/10 studies<br>Morning stiffness: 1 X-sectional study reported no significant difference<br>Disease activity: 8/8 X-sectional studies reported high BASDAI for smokers compared to non-smokers; 1 cohort study reported the same<br>Structural damage: 6/7 studies reported smoking was associated with more damage<br>QoL: 4/5 studies reported smoking was associated with worse QoL | Moderate |

AMSTAR2 = Assessing the Methodological Quality of Systematic Reviews 2, QoL = quality of life, RR = relative risk, SR = systematic review

## Supplementary table 19 – Axial spondyloarthritis and smoking – evidence from individual studies

| Author                              | Exposure detail                              | Study design             | Inclusion criteria                                                                                                                                                                                                                                                                                                                   | Outcomes                                                                            | Adjustment variables | Nb participants | Follow-up length                     | Age                    | Gender             | Key findings                                                                                                                                                                                                                                                                                                                                                                                                                                                                                                                                                                              |
|-------------------------------------|----------------------------------------------|--------------------------|--------------------------------------------------------------------------------------------------------------------------------------------------------------------------------------------------------------------------------------------------------------------------------------------------------------------------------------|-------------------------------------------------------------------------------------|----------------------|-----------------|--------------------------------------|------------------------|--------------------|-------------------------------------------------------------------------------------------------------------------------------------------------------------------------------------------------------------------------------------------------------------------------------------------------------------------------------------------------------------------------------------------------------------------------------------------------------------------------------------------------------------------------------------------------------------------------------------------|
| Maas et al., 2017 <sup>63</sup>     | Smoking duration                             | Prospective cohort study | -AS patients fulfilling the modified New York criteria enrolled in the Groningen Leeuwarden AS cohort between November 2004 and December 2012<br>-available lateral radiographs of the thoracic and lumbar spine at baseline and after 2 years of follow-up.<br>-consecutive axial SpA outpatients irrespective of treatment regimen | prevalence and incidence of radiographic vertebral fractures                        | -                    | 292             | 2 years                              | Mean (SD): 42.8 (12.5) | Men:70%            | Median smoking duration (yrs)<br>Prevalent fractures:<br>Present 17 (0–29)<br>Absent 10 (0–23) , p= 0.043<br>Incident fractures:<br>Present 17 (IQR=5-30)<br>Absent 12 (IQR 0-24) p=0.205<br>AS patients with a smoking duration of ≥20 years had a 2 times higher risk of having radiographic vertebral fractures than nonsmokers and patients with shorter smoking duration (approx. 30% vs 10–15%)                                                                                                                                                                                     |
| Ward et al., 2002 <sup>64</sup>     | Current smokers, non-smokers                 | Prospective cohort study | - diagnosis of AS by the modified New York criteria<br>-be age 18 or older<br>-be able to read English                                                                                                                                                                                                                               | Functional disability (HAQ)                                                         | -                    | 212             | Median of 5 years (range 1.0 to 7.5) | 47.8 (13.6)            | Men: 149 (70.3)    | Rate of progression of the HAQ-S: increased by an additional 0.025 units/yr (IC95% 0.0071, 0.0429) among current smokers compared to non-smokers<br>p=0.007                                                                                                                                                                                                                                                                                                                                                                                                                               |
| Deminger et al., 2018 <sup>65</sup> | Ever smokers, current smokers, never smokers | Prospective cohort study | - AS according to the modified New York criteria                                                                                                                                                                                                                                                                                     | spinal radiographic progression (modified Stoke Ankylosing Spondylitis Spine Score) | -                    | 204             | 5 years                              | 50 (13)                | 89 Men<br>77 Women | Univariate logistic regression analyses for progression of ≥ 2 mSASSS units over 5 years<br>Total group<br>Ever-smoker: OR = 1.74 (0.88-3.44), p= 0.11<br>Current smoker: OR = 1.44 (0.50-4.14), p= 0.50<br>Men<br>Ever-smoker: OR = 3.53 (1.42-8.77), p= 0.007<br>Current smoker: OR = 3.33 (0.74-15.00), p= 0.12<br>Women<br>Ever-smoker: OR = 0.47 (0.14-1.65), p= 0.24<br>Current smoker: OR = 0.48 (0.06-4.18), p= 0.51<br>Smoking: predictor of progression of ≥ 2 modified Stoke Ankylosing Spondylitis Spine Score units over 5 years in men<br>Ever smokers: OR=3.52 (1.29-9.58) |

|                                      |                                     |                            |                                                                                                                                                                                                                                                                                                                                                                                                     |                                                                                                                                                |                                                                                 |     |         |                                           |                       |                                                                                                                                                                                                                                                                                                                                                                                   |
|--------------------------------------|-------------------------------------|----------------------------|-----------------------------------------------------------------------------------------------------------------------------------------------------------------------------------------------------------------------------------------------------------------------------------------------------------------------------------------------------------------------------------------------------|------------------------------------------------------------------------------------------------------------------------------------------------|---------------------------------------------------------------------------------|-----|---------|-------------------------------------------|-----------------------|-----------------------------------------------------------------------------------------------------------------------------------------------------------------------------------------------------------------------------------------------------------------------------------------------------------------------------------------------------------------------------------|
| Poddubnyy et al., 2012 <sup>66</sup> | Current smoking, present vs. absent | Prospective cohort study   | - definite clinical diagnosis of axial SpA according to the treating rheumatologist<br>- fulfillment of the modified New York criteria<br>-duration of symptoms was restricted to 10 years at the time of inclusion<br><br>Non radiographic AxSpA:<br>- fulfillment of the European Spondyloarthropathy Study Group criteria with minor modifications<br>-maximum duration of symptoms was 5 years. | -spinal radiographic progression (defined as worsening of the mean modified Stoke Ankylosing Spondylitis Spine Score by >2 units over 2 years) | baseline CRP levels, time-averaged CRP levels , baseline ESR, time-averaged ESR | 210 | 2 years | Mean (SD): 37.1 (10.6)                    | Men: N(%) 107 (51.0)  | Current smoking significantly associated with an increase of 2 mSASSS units after 2 years<br>OR = 2.75 (1.25-6.05), p= 0.012<br>4 models adjusted on baseline CRP levels, time- averaged CRP levels , baseline ESR, time-averaged ESR<br>OR = 2.52 (1.06 5.99), p= 0.037<br>OR = 2.41 (1.01-5.76), p=0.048<br>OR = 2.54 (1.06-6.09), p= 0.037<br>OR = 2.31 (0.96-5.51); p = 0.060 |
| Ward et al., 2001 <sup>67</sup>      | Current, former, never smokers      | Retrospective cohort study | - diagnosis of AS by the modified New York criteria<br>-be age 18 or older<br>-be able to read English                                                                                                                                                                                                                                                                                              | Work disability (standardised questionnaire)                                                                                                   | -                                                                               | 234 | NA      | Mean (SD) age at onset of AS: 27.4 (11.0) | Men, n (%) 165 (70.5) | Current or former smoker (vs never)<br>HR = 1.31 (0.54-3.14), p= 0.55                                                                                                                                                                                                                                                                                                             |
| Wendling et al., 2017 <sup>68</sup>  | NA                                  | Prospective cohort study   | - early inflammatory back pain of more than 3 months and less than 3 years of duration<br>-symptoms suggestive of SpA according to the local investigator's assessment                                                                                                                                                                                                                              | Remission (according 2 definitions: ASDAS-CRP < 1.3 or BASDAI < 3.6)                                                                           | -                                                                               | 706 | 2 years | mean age is 33.8 (8.6) years              | Men: 46%              | ASDAS < 1.3<br>At baseline: Smoking: OR = 0.22 (0.08-0.56)<br>At 2 year: Smoking: OR = 0.34 (0.13-0.87)<br>BASDAI < 3.6<br>At baseline: Smoking: OR = 0.39 (0.16-0.95)<br>At 2 years: Smoking: OR = 0.31 (0.15-0.63)                                                                                                                                                              |

**Supplementary table 20 – Axial spondyloarthritis and smoking: methodological quality of individual studies**

| Author                               | Study participation   | Study attrition   | Prognostic factor measurement | Outcome measurement | Study confounding     | Statistical analysis and reporting | Quality |
|--------------------------------------|-----------------------|-------------------|-------------------------------|---------------------|-----------------------|------------------------------------|---------|
| Maas et al., 2017 <sup>63</sup>      | Low risk of bias      | Low risk of bias  | Low risk of bias              | Low risk of bias    | Low risk of bias      | Low risk of bias                   | High    |
| Ward et al., 2002 <sup>64</sup>      | Low risk of bias      | Low risk of bias  | Low risk of bias              | Low risk of bias    | Low risk of bias      | Low risk of bias                   | High    |
| Deminger et al., 2018 <sup>65</sup>  | Low risk of bias      | Low risk of bias  | Low risk of bias              | Low risk of bias    | Low risk of bias      | Low risk of bias                   | High    |
| Poddubnyy et al., 2012 <sup>66</sup> | Low risk of bias      | High risk of bias | Low risk of bias              | Low risk of bias    | Low risk of bias      | Low risk of bias                   | Low     |
| Ward et al., 2001 <sup>67</sup>      | Low risk of bias      | High risk of bias | Low risk of bias              | Low risk of bias    | Low risk of bias      | Low risk of bias                   | Low     |
| Wendling et al., 2017 <sup>68</sup>  | Moderate risk of bias | High risk of bias | Low risk of bias              | Low risk of bias    | Moderate risk of bias | Low risk of bias                   | Low     |

**Supplementary table 21 – Psoriatic arthritis and smoking: evidence from individual studies**

| Author                             | Exposure detail              | Study design             | Inclusion criteria                                                                                                                                                                                                                                       | Outcomes                | Adjustment variables | Nb participants | Follow-up length | Age                                                             | Gender          | Key findings                                                                                     |
|------------------------------------|------------------------------|--------------------------|----------------------------------------------------------------------------------------------------------------------------------------------------------------------------------------------------------------------------------------------------------|-------------------------|----------------------|-----------------|------------------|-----------------------------------------------------------------|-----------------|--------------------------------------------------------------------------------------------------|
| Tillett et al., 2013 <sup>69</sup> | Current, ever, never smokers | Prospective cohort study | Patients selected from the longitudinal cohort of PsA patients at the Royal National Hospital for Rheumatic Diseases, Bath, UK<br>98.2% of the cohort fulfil the Classification for Psoriatic Arthritis (CASPAR) criteria and disease duration >10 years | Physical function (HAQ) | -                    | 267 patients    | unclear          | Age at diagnosis<br>≤50 years: 210 (79%)<br>>50 years: 57 (21%) | Women (%): 47.2 | Effect of smoking (current or ever vs never) on HAQ (difference from baseline): 0.23<br>p = 0.02 |



**Supplementary table 22 – Psoriatic arthritis and smoking: methodological quality of individual studies**

| Author                | Study participation   | Study attrition  | Prognostic factor measurement | Outcome measurement | Study confounding     | Statistical analysis and reporting | Quality  |
|-----------------------|-----------------------|------------------|-------------------------------|---------------------|-----------------------|------------------------------------|----------|
| Tillett <sup>69</sup> | Moderate risk of bias | Low risk of bias | Low risk of bias              | Low risk of bias    | moderate risk of bias | Low risk of bias                   | Moderate |

## Supplementary table 23 – Systemic sclerosis and smoking: evidence from individual studies

| Author                                | Exposure detail                                 | Study design             | Inclusion criteria                                                                                                                                                                                                                                                                                    | Outcomes                                                                           | Adjustment variables | Nb participants | Follow-up length | Age                                                                | Gender                                                              | Key findings                                                                                                                                                                                                               |
|---------------------------------------|-------------------------------------------------|--------------------------|-------------------------------------------------------------------------------------------------------------------------------------------------------------------------------------------------------------------------------------------------------------------------------------------------------|------------------------------------------------------------------------------------|----------------------|-----------------|------------------|--------------------------------------------------------------------|---------------------------------------------------------------------|----------------------------------------------------------------------------------------------------------------------------------------------------------------------------------------------------------------------------|
| Sakr et al., 2018 <sup>70</sup>       | smoking history and number of pack-years smoked | Prospective cohort study | - at least 18 years of age<br>-diagnosis of SSc confirmed by a participating rheumatologist<br>- be fluent in either English or French<br>-meet the 2013 ACR/EULAR (American College of Rheumatology/European League Against Rheumatism) classification criteria for SSc                              | Risk of lung cancer                                                                | -                    | 1560            | max 11y          | Mean (SD): Lung cancer: 58.8 (11.2)<br>No lung cancer; 55.2 (12.3) | Women: N(%) Lung cancer: 12 (66.7%)<br>No lung cancer: 1321 (86.1%) | Smoking vs non-smoking (multivariate analysis)<br><10 pack-years: HR = 2.36 (0.51-10.97)<br>10–20 pack-years: HR = 5.04 (1.11-22.85)<br>20–30 pack-years: HR = 3.54 (0.55-23.00)<br>>30 pack-years: HR = 6.17 (1.29-29.49) |
| Khimdas et al., 2011 <sup>71</sup>    | Never, ever smokers (past or present)           | Prospective cohort study | - diagnosis of SSc by a physician<br>- informed and signed consent                                                                                                                                                                                                                                    | digital ulcers                                                                     | -                    | 938             | NA               | Mean (SD): 55.4 (0.34)                                             | Female: N(%) 807 (86.0)                                             | Smoking OR=0.984 p=0.909 (univariate analysis)                                                                                                                                                                             |
| Kwakkenbos et al., 2018 <sup>72</sup> | NA                                              | Prospective cohort study | - classified by a physician as having SSc according to the 2013 ACR/EULAR classification criteria<br>-be at least 18 years of age<br>-have the ability to give informed consent<br>-be fluent in English, French or Spanish<br>-have access and be able to respond to questionnaires via the internet | Hand function (Cochin Hand Function Scale, higher scores indicate more difficulty) | -                    | 1193            | NA               | Mean (SD): 55.1 (12.3)                                             | Women: N(%) 1047 (88)                                               | Relationship between current smoking and hand function<br>Standardised coefficient regression (beta) = 0.07<br>P = 0.004                                                                                                   |

**Supplementary table 24 – Systemic sclerosis and smoking: methodological quality of individual studies**

| Author                                | Study participation   | Study attrition       | Prognostic factor measurement | Outcome measurement | Study confounding     | Statistical analysis and reporting | Quality  |
|---------------------------------------|-----------------------|-----------------------|-------------------------------|---------------------|-----------------------|------------------------------------|----------|
| Sakr et al., 2018 <sup>70</sup>       | Low risk of bias      | Moderate risk of bias | Low risk of bias              | Low risk of bias    | Low risk of bias      | Low risk of bias                   | Moderate |
| Khimdas et al., 2011 <sup>71</sup>    | Moderate risk of bias | High risk of bias     | Low risk of bias              | Low risk of bias    | Moderate risk of bias | Moderate risk of bias              | Low      |
| Kwakkenbos et al., 2018 <sup>72</sup> | Low risk of bias      | high risk of bias     | Low risk of bias              | Low risk of bias    | Moderate risk of bias | Low risk of bias                   | Low      |

**Supplementary table 25 – Gout and smoking: evidence from individual studies**

| Author                                      | Exposure detail | Study design               | Inclusion criteria                                                        | Outcomes                                                                                                                                                               | Adjustment variables | Nb participants | Follow-up length                                                                                                                        | Age                                                                                                                   | Gender       | Key findings                                                                                                                                                                               |
|---------------------------------------------|-----------------|----------------------------|---------------------------------------------------------------------------|------------------------------------------------------------------------------------------------------------------------------------------------------------------------|----------------------|-----------------|-----------------------------------------------------------------------------------------------------------------------------------------|-----------------------------------------------------------------------------------------------------------------------|--------------|--------------------------------------------------------------------------------------------------------------------------------------------------------------------------------------------|
| Alvarez-Nemegyei et al., 2005 <sup>73</sup> | Smoking habit   | Nested case-control study  | - diagnosis of gouty arthritis based on Wallace criteria                  | Musculoskeletal disability (American College of Rheumatology functional class)<br>-chronic renal failure (glomerular filtration rate < 60 ml/min/1.73 m <sup>2</sup> ) | -                    | 90              | NA                                                                                                                                      | Mean (SD): 54 (12) years (range 22–81)                                                                                | 88 men (98%) | 33% of smokers in patients with disability vs 40% in patients without disability, p=0.44<br>36% of smokers in patients with renal failure vs 37% in patients without renal failure, p=0.92 |
| Su et al., 2008 <sup>74</sup>               | Tobacco use     | Retrospective cohort study | -male primary gout subjects<br>-meet criteria for clinically defined gout | Renal function deterioration (based on creatinine levels)                                                                                                              | -                    | 318             | Subjects with renal function deterioration: 81.20 (53.29) months<br>Subjects without renal function deterioration: 92.41 (46.72) months | Subjects with renal function deterioration: 57.21 (13.02) Subjects without renal function deterioration: 62.5 (14.98) | 318 men      | 26.4% of smokers in patients with renal function deterioration vs 18.2% in patients without renal function deterioration, p=0.488 (univariate)                                             |

**Supplementary table 26 – Gout and smoking: Methodological quality of individual studies**

| Author                                      | Study participation   | Study attrition   | Prognostic factor measurement | Outcome measurement | Study confounding     | Statistical analysis and reporting | Quality  |
|---------------------------------------------|-----------------------|-------------------|-------------------------------|---------------------|-----------------------|------------------------------------|----------|
| Alvarez-Nemegyei et al., 2005 <sup>73</sup> | Low risk of bias      | High risk of bias | Low risk of bias              | Low risk of bias    | Moderate risk of bias | Moderate risk of bias              | Low      |
| Su et al., 2008 <sup>74</sup>               | Moderate risk of bias | Low risk of bias  | Low risk of bias              | Low risk of bias    | Moderate risk of bias | Low risk of bias                   | Moderate |

### Supplementary table 27 – Summary of cut-offs used for alcohol exposure in the individual studies

| Authors                                    | Level of evidence | Methodological quality | Details on alcohol consumption                                                                                                                                                                                                                                                      |
|--------------------------------------------|-------------------|------------------------|-------------------------------------------------------------------------------------------------------------------------------------------------------------------------------------------------------------------------------------------------------------------------------------|
| Vandenberg et al., 1994 <sup>75</sup>      | 2B                | Low                    | Chronic alcoholics vs Reformed alcoholics (abstained for 2 years) vs Non-alcoholics                                                                                                                                                                                                 |
| Jonsen et al., 2007 <sup>76</sup>          | 2B                | Moderate               | Alcohol intake ≤15 g/month vs > 15 g/month                                                                                                                                                                                                                                          |
| Kim et al., 2008 <sup>77</sup>             | 2B                | Low                    | ≥ 1 drink per week vs < 1 drink per week<br><i>The questionnaire used did not define specific alcohol quantities or volumes that constituted a given alcoholic beverage</i>                                                                                                         |
| Su et al., 2008 <sup>74</sup>              | 2B                | Low                    | Regular vs social drinker                                                                                                                                                                                                                                                           |
| Nissen et al., 2010 <sup>78</sup>          | 2B                | Low                    | Occasional drinkers, daily drinkers (consumption of alcoholic beverages on 1 occasion per day), and heavy drinkers (consumption of alcoholic beverages on several occasions per day)                                                                                                |
| Davis et al., 2013 <sup>79</sup>           | 2B                | Low                    | <15 drinks per month vs ≥15 drinks per month<br><i>The questionnaire used did not define specific alcohol quantities or volumes that constituted a given alcoholic beverage</i>                                                                                                     |
| Lu et al., 2014 <sup>26</sup>              | 2B                | Low                    | None, 0.1–5.0, 5.1–10.0 and >10 grams per day                                                                                                                                                                                                                                       |
| Neogi et al., 2014 <sup>80</sup>           | 2B                | Low                    | Seven categories: no alcohol consumption, >0–1 drink, >1–2, >2–4, >4–6, >6–8, and more than 8 drinks<br>Moderate alcohol intake : no more than 2 drinks per day for men and no more than 1 drink per day for women<br><i>One typical drink is approximately 15 grams of alcohol</i> |
| Hanvivadhanakul et al., 2015 <sup>81</sup> | 2B                | Low                    | Yes vs No                                                                                                                                                                                                                                                                           |
| Bird et al., 2017 <sup>11</sup>            | 2B                | Low                    | Never, Rare, Mild (< 30 g), Moderate (30–40 g/day) or Heavy (> 40 g)                                                                                                                                                                                                                |
| Humphreys et al., 2017 <sup>82</sup>       | 2B                | Moderate               | Weekly alcohol consumption (units) : 0, Mild (1–7), Moderate (8–14), Moderate High (15–21), High (>21)<br><i>A unit of alcohol represents 10 mL or 8 g of pure alcohol</i>                                                                                                          |
| Sageloli et al., 2018 <sup>83</sup>        | 2B                | High                   | Abstinent, moderate consumption (≤ 20 g/day for women and ≤ 30 g/day for men), abuse (> 20 g/day for women and > 30 g/day for men)                                                                                                                                                  |

**Supplementary table 28 – RMDs and alcohol: summary of evidence from systematic review**

| Author (date)                      | Type of review | RMD  | Study type included | Outcomes | Alcohol associated with worse outcome | Key findings (negative MD/SMD favours intervention)                                                                                                                                 | AMSTAR2  |
|------------------------------------|----------------|------|---------------------|----------|---------------------------------------|-------------------------------------------------------------------------------------------------------------------------------------------------------------------------------------|----------|
| Buirs et al., 2016 <sup>84</sup>   | SR             | OA   | Observational       | Function | ✘                                     | Two studies reported on association between alcohol consumption and functional ability post total hip replacement, both finding no association                                      | Moderate |
| Nielsen et al., 2018 <sup>85</sup> | SR             | Gout | Guidelines          | -        | ✓                                     | 12/15 guidelines recommended reducing alcohol intake for gout patients. Of these, 5 guidelines rated the evidence as moderate/low quality, 7 rated the evidence as very low quality | Low      |

AMSTAR2 = Assessing the Methodological Quality of Systematic Reviews 2, OA = osteoarthritis, SR = systematic review

## Supplementary table 29 – Rheumatoid arthritis and alcohol: evidence from individual studies

| Author                           | Exposure detail                                                                                                                                        | Study design             | Inclusion criteria                                                                                                                                                                                                                                             | Outcomes                                              | Adjustment variables                       | Nb participants | Follow-up length                                         | Age                    | Gender                   | Key findings                                                                                                                                                                                |
|----------------------------------|--------------------------------------------------------------------------------------------------------------------------------------------------------|--------------------------|----------------------------------------------------------------------------------------------------------------------------------------------------------------------------------------------------------------------------------------------------------------|-------------------------------------------------------|--------------------------------------------|-----------------|----------------------------------------------------------|------------------------|--------------------------|---------------------------------------------------------------------------------------------------------------------------------------------------------------------------------------------|
| Bird et al., 2017 <sup>11</sup>  | Alcohol consumption categorised as daily, heavy, moderate, mild, rare and never                                                                        | Prospective cohort study | - newly diagnosed patients <12 months from initial presentation at clinic<br>-date of onset <24 months from their initial presentation<br>-≥18 years old<br>-treated in a participating centre<br>-6 months of follow-up data<br>-had a DAS28-ESR at 24 months | DAS28-ESR remission (remission cut-off not defined)   | Age and sex                                | 1017            | 24 months                                                | Mean (SD): 60.4 (14.7) | Women: N(%)<br>708 (70%) | Multivariable OR (95% CI)<br>daily, moderate and heavy consumption vs never: 3.51 (1.68-7.34)<br>mild consumption vs never: 1.25 (0.65-2.40)<br>rare consumption vs never: 1.64 (0.99-2.70) |
| Davis et al., 2013 <sup>79</sup> | Current, past alcohol use, no alcohol use<br><br>Those who used alcohol: asked to estimate the number of alcoholic drinks consumed in an average month | Prospective cohort study | -African American<br>-ACR 1987 criteria<br>-≤2 years disease duration at baseline                                                                                                                                                                              | Radiographic progression (Sharp/van der Heijde score) | Age, sex, disease duration, follow-up time | 166             | 3 years after symptom onset (1-3 years after enrollment) | Mean (SD): 51 (13)     | Women: 86%               | Sharp score, multivariable beta (95% CI)<br>< 15 drinks per month: -0.005 (-0.041, 0.031)<br>≥ 15 drinks per month: 0.007 (0.001, 0.013)                                                    |



|                                      |                                                                                                                                                                                                                   |                            |                                                                                                  |                                                                                                                                                    |                |        |                  |                         |                            |                                                                                                                                                                                                                                                                                                                                                                                                                                                                                   |
|--------------------------------------|-------------------------------------------------------------------------------------------------------------------------------------------------------------------------------------------------------------------|----------------------------|--------------------------------------------------------------------------------------------------|----------------------------------------------------------------------------------------------------------------------------------------------------|----------------|--------|------------------|-------------------------|----------------------------|-----------------------------------------------------------------------------------------------------------------------------------------------------------------------------------------------------------------------------------------------------------------------------------------------------------------------------------------------------------------------------------------------------------------------------------------------------------------------------------|
| Doran et al., 2002 <sup>35</sup>     | Baseline alcoholism                                                                                                                                                                                               | Prospective cohort study   | -RA diagnosis from 1955-1994<br>- aged ≥18 years<br>-diagnosis confirmed using ACR 1987 criteria | Infections                                                                                                                                         | -              | 609    | Mean: 12.7 years | 58.0 years              | Women: 73.1%               | Infection, hazard ratio (95% CI)<br>Univariable: 1.91 (1.23, 2.99)<br>Multivariable: 1.67 (1.16, 2.41)<br>Hospitalised Infection, hazard ratio (95% CI)<br>Univariable: 2.00 (1.27, 3.16)<br>Multivariable: 1.85 (1.25, 2.74)                                                                                                                                                                                                                                                     |
| Humphreys et al., 2017 <sup>82</sup> | Alcohol consumption: yes/no + units of alcohol consumed per week<br>1 unit of alcohol = 10 mL or 8 g of pure alcohol and is used in the UK to make comparisons of alcohol consumption across different beverages. | Prospective cohort study   | All patients with RA starting MTX after 1987                                                     | Episode of transaminitis (defined as alanine transaminase or aspartate aminotransferase levels of three times the upper limit of normal or higher) | Age and gender | 11 839 | max 30 years     | Mean (SD): 61 (13.9)    | Women: N(%)<br>8401 (71%)  | Mild alcohol consumption (1-7 units per week) vs nondrinkers:<br>HR (95% CI) = 1.02 (0.82-1.28)<br>Moderate alcohol consumption (8-14 units per week) vs nondrinkers:<br>HR= 0.98 (0.71-1.35)<br>Statistically significant increase in rates of transaminitis for patients consuming over 21 units per week compared with non-drinkers: HR =1.85 (1.17 -2.93)<br>Each increased unit of alcohol consumed was associated with a higher risk of transaminitis: HR =1.01 (1.00-1.02) |
| Kim et al., 2008 <sup>77</sup>       | Alcohol consumers (alcohol consumption ≥ 1 drink per week) and nonconsumers                                                                                                                                       | Retrospective cohort study | - American College of Rheumatology 1987 revised criteria for the classification of RA            | Extraarticular manifestations (pericarditis, pleuritis, Felty's syndrome, cutaneous                                                                | -              | 405    | NA               | Mean (SD): 56.0 (11.74) | Women: N (%)<br>365 (90.1) | Occurrence of overall EAM: negative association with alcohol consumption OR=0.43 (0.21-0.91), p = 0.023                                                                                                                                                                                                                                                                                                                                                                           |

(alcohol consumption  
<1 drink per week)

vasculitis,  
polyneuropathy,  
ocular involvement  
(e.g., scleritis,  
episcleritis, retinal  
vasculitis),  
glomerulonephritis,  
vasculitis involving  
other organs,  
amyloidosis,  
xerostomia,  
keratoconjunctivitis  
sicca, secondary  
Sjögren syndrome,  
pulmonary fibrosis,  
cervical  
myelopathy, and  
rheumatoid  
nodules  
irrespective of the  
sites involved)

Multivariate analysis:  
alcohol consumption  
carried a lower risk for  
occurrence of EAM  
OR=0.22 (0.09-0.54)

|                               |                                                                                                                                                                                      |                          |                         |                                                                            |                                                                                                                                                                                                                                                   |     |         |                                                                                                                                                                                                        |                                                                                                                                                                                 |                                                                                                                                                                                                                                                                                                                                                                                                                                                                                                |
|-------------------------------|--------------------------------------------------------------------------------------------------------------------------------------------------------------------------------------|--------------------------|-------------------------|----------------------------------------------------------------------------|---------------------------------------------------------------------------------------------------------------------------------------------------------------------------------------------------------------------------------------------------|-----|---------|--------------------------------------------------------------------------------------------------------------------------------------------------------------------------------------------------------|---------------------------------------------------------------------------------------------------------------------------------------------------------------------------------|------------------------------------------------------------------------------------------------------------------------------------------------------------------------------------------------------------------------------------------------------------------------------------------------------------------------------------------------------------------------------------------------------------------------------------------------------------------------------------------------|
| Lu et al., 2014 <sup>26</sup> | Alcohol consumption (none, 0.1–5.0, 5.1–10.0 and >10 grams per day, or gm/day). Alcohol consumption was initially measured as drinks per day and then translated into grams per day. | Prospective cohort study | RA patients with HLA-SE | -disease activity (DAS28-CRP3)<br>-functional health status (Modified HAQ) | baseline<br>DAS28-CRP3<br>or MHAQ,<br>gender, age,<br>race,<br>education,<br>seropositivity (anti-CCP<br>antibody<br>and/or<br>rheumatoid<br>factor<br>positive),<br>disease<br>duration and<br>body mass<br>index,<br>current drug<br>treatments | 662 | 4 years | Mean (SD)<br>Alcohol<br>Intake,<br>gm/day :<br>None (N=205)<br>60.2 (13.1)<br>0.1–5.0 gm/d<br>(N=239): 55.0<br>(12.7)<br>5.1–10.0 gm/d<br>(N=63): 52.0<br>(4.1)<br>>10 gm/d<br>(N=108): 60.0<br>(13.0) | Women (%)<br>Alcohol<br>Intake,<br>gm/day :<br>None (N=205)<br>87.3%<br>0.1–5.0 gm/d<br>(N=239):<br>85.4%<br>5.1–10.0 gm/d<br>(N=63):<br>81.0%<br>>10 gm/d<br>(N=108):<br>70.4% | Weak relationship<br>with DAS28- CRP3 in<br>seropositive RA<br>Patients with alcohol<br>consumption of 5.1–<br>10.0 grams/day vs no<br>alcohol use:<br>lower level of<br>Modified HAQ (MHAQ)<br>one year later in all RA<br>(0.34±0.02 vs.<br>0.40±0.02, p=0.02), as<br>well as in seropositive<br>(0.38±0.03 vs.<br>0.44±0.02, p=0.04) and<br>seronegative RA<br>(0.22±0.04 vs.<br>0.31±0.04, p=0.04)<br>Moderate alcohol<br>consumption: tended<br>to reduce MHAQ only<br>in HLA-SE positive |
|-------------------------------|--------------------------------------------------------------------------------------------------------------------------------------------------------------------------------------|--------------------------|-------------------------|----------------------------------------------------------------------------|---------------------------------------------------------------------------------------------------------------------------------------------------------------------------------------------------------------------------------------------------|-----|---------|--------------------------------------------------------------------------------------------------------------------------------------------------------------------------------------------------------|---------------------------------------------------------------------------------------------------------------------------------------------------------------------------------|------------------------------------------------------------------------------------------------------------------------------------------------------------------------------------------------------------------------------------------------------------------------------------------------------------------------------------------------------------------------------------------------------------------------------------------------------------------------------------------------|

|                                      |                                                                                                                                                                                                                                                                                                                                                                                                                                                      |                          |                                                                                                                                                            |                                                                                                           |                                                                                                                           |       |           |                                                                  |                                               |                                                                                                                                                                                                                                                                                                                                                                                                                                                                                                                                                                                                                                                                                                                                                                           |
|--------------------------------------|------------------------------------------------------------------------------------------------------------------------------------------------------------------------------------------------------------------------------------------------------------------------------------------------------------------------------------------------------------------------------------------------------------------------------------------------------|--------------------------|------------------------------------------------------------------------------------------------------------------------------------------------------------|-----------------------------------------------------------------------------------------------------------|---------------------------------------------------------------------------------------------------------------------------|-------|-----------|------------------------------------------------------------------|-----------------------------------------------|---------------------------------------------------------------------------------------------------------------------------------------------------------------------------------------------------------------------------------------------------------------------------------------------------------------------------------------------------------------------------------------------------------------------------------------------------------------------------------------------------------------------------------------------------------------------------------------------------------------------------------------------------------------------------------------------------------------------------------------------------------------------------|
| Nissen et al.,<br>2010 <sup>78</sup> | Drinkers or non-drinkers of alcoholic beverages, based on the self-reported drinking status in the patient questionnaire. Patients who discontinued drinking alcohol and those who started drinking during the observation period were categorized as drinkers. Occasional drinkers, daily drinkers (consumption of alcoholic beverages on 1 occasion per day), and heavy drinkers (consumption of alcoholic beverages on several occasions per day) | Prospective cohort study | - confirmed diagnosis of RA by a rheumatologist<br>-known alcohol consumption status,<br>-at least 2 consecutive sets of radiographs of the hands and feet | -progression of radiographic joint damage (Ratingen score)<br>-progression of functional disability (HAQ) | Rheumatoid factor (RF), age, sex, education level, Disease Activity Score in 28 joints (DAS28), HAQ status, DMARD therapy | 2 908 | 3.9 years | Mean<br>Non-drinkers: 55.7 years<br>Alcohol drinkers: 53.9 years | Men (%) :<br>Non-drinkers: 12<br>Drinkers: 32 | <p>patients, but not in HLA-SE negative patients</p> <p>Progression of radiographic joint damage at 1 year: in the drinkers: mean of 0.99% (0.89-1.09) in the occasional consumers: 0.99% (0.89-1.11) in the daily consumers: 0.92% (0.70-1.13) in the heavy consumers: 1.29% (0.82-1.76) in the nondrinkers: mean of 1.13% (1.01-1.26)</p> <p>Adjusted evolution of radiographic damage: -significantly less in occasional drinkers compared with nondrinkers (P=0.01) and in daily drinkers compared with nondrinkers (P=0.001) -significantly worse in heavy drinkers compared with occasional and daily drinkers (P&lt;0.001)</p> <p>Progression of functional disability: more favorable evolution in the drinkers<br/>Increase in HAQ scores at 5 years of 0.36</p> |
|--------------------------------------|------------------------------------------------------------------------------------------------------------------------------------------------------------------------------------------------------------------------------------------------------------------------------------------------------------------------------------------------------------------------------------------------------------------------------------------------------|--------------------------|------------------------------------------------------------------------------------------------------------------------------------------------------------|-----------------------------------------------------------------------------------------------------------|---------------------------------------------------------------------------------------------------------------------------|-------|-----------|------------------------------------------------------------------|-----------------------------------------------|---------------------------------------------------------------------------------------------------------------------------------------------------------------------------------------------------------------------------------------------------------------------------------------------------------------------------------------------------------------------------------------------------------------------------------------------------------------------------------------------------------------------------------------------------------------------------------------------------------------------------------------------------------------------------------------------------------------------------------------------------------------------------|

|                                     |                                                                                                                                                                                                                                                                                                      |                          |                                                                                                                                                                                                                                           |                                                                                                         |                                                                                                                                                                              |     |           |                                                                                                                    |                                                                                         |                                                                                                                                                                                                                                                                                                                                                                                                                                                                                                                                                                                                                                                                                                   |
|-------------------------------------|------------------------------------------------------------------------------------------------------------------------------------------------------------------------------------------------------------------------------------------------------------------------------------------------------|--------------------------|-------------------------------------------------------------------------------------------------------------------------------------------------------------------------------------------------------------------------------------------|---------------------------------------------------------------------------------------------------------|------------------------------------------------------------------------------------------------------------------------------------------------------------------------------|-----|-----------|--------------------------------------------------------------------------------------------------------------------|-----------------------------------------------------------------------------------------|---------------------------------------------------------------------------------------------------------------------------------------------------------------------------------------------------------------------------------------------------------------------------------------------------------------------------------------------------------------------------------------------------------------------------------------------------------------------------------------------------------------------------------------------------------------------------------------------------------------------------------------------------------------------------------------------------|
| Sageloli et al., 2018 <sup>83</sup> | Self-declared consumption of alcohol (grams/day) 3 categories according to the French recommendations of consumption thresholds [abstinent; moderate consumption, defined as $\leq 20$ g/day for women and $\leq 30$ g/day for men; and abuse, i.e. $> 20$ g/day for women and $> 30$ g/day for men] | Prospective cohort study | Patients with at least two joints affected by synovitis for more than 6 weeks and less than 6 months at baseline, and not undergoing treatment with synthetic or biological disease-modifying anti-rheumatic drugs (bDMARDs) at inclusion | Occurrence of radiological disease progression (increase to 5 points of the Sharp/van der Heijde score) | age, baseline erosion, rheumatoid factor, anti-citrullinated peptide antibody, smoking status, body mass index, and treatment with leflunomide or methotrexate and biologics | 596 | 60 months | Median (IQR) Non-consumers: 50.1 (38.9; 56.9) / Moderate consumers: 53.7 (44.7; 59.4) / Abusers: 56.1 (51.5; 57.0) | Women: N (%) Non-consumers: 399 (80.9) Moderate consumers: 50 (62.5) Abusers: 13 (56.5) | (0.32-0.41) in the drinkers vs 0.41 (0.35-0.46) in the nondrinkers<br>No significant effect modification in HAQ scores by the quantity of alcohol consumption<br>No significant difference in radiological progression according to the different drinker groups (abstinent, moderate, abuse) at 12 and 36 months<br>At 36 months, radiological progression in female consumers: OR = 1.17 (0.72-1.91), p = 0.532<br>in male consumers: OR = 0.57 (0.26-1.24), p = 0.159<br>At 60 months: Significant deleterious effect of moderate consumption in women: OR = 1.73 (1.01-2.96), p = 0.045<br>Trend towards a protective effect of moderate consumption in men: OR = 0.50 (0.21-1.16), p = 0.106 |
|-------------------------------------|------------------------------------------------------------------------------------------------------------------------------------------------------------------------------------------------------------------------------------------------------------------------------------------------------|--------------------------|-------------------------------------------------------------------------------------------------------------------------------------------------------------------------------------------------------------------------------------------|---------------------------------------------------------------------------------------------------------|------------------------------------------------------------------------------------------------------------------------------------------------------------------------------|-----|-----------|--------------------------------------------------------------------------------------------------------------------|-----------------------------------------------------------------------------------------|---------------------------------------------------------------------------------------------------------------------------------------------------------------------------------------------------------------------------------------------------------------------------------------------------------------------------------------------------------------------------------------------------------------------------------------------------------------------------------------------------------------------------------------------------------------------------------------------------------------------------------------------------------------------------------------------------|

**Supplementary table 30 – Rheumatoid arthritis and alcohol: methodological quality of individual studies**

| Authors                              | Study participation | Study attrition       | Prognostic factor measurement | Outcome measurement | Study confounding     | Statistical analysis and reporting | Quality  |
|--------------------------------------|---------------------|-----------------------|-------------------------------|---------------------|-----------------------|------------------------------------|----------|
| Bird et al., 2017 <sup>11</sup>      | Low risk of bias    | High risk of bias     | Low risk of bias              | Low risk of bias    | Moderate risk of bias | Low risk of bias                   | Low      |
| Davis et al., 2013 <sup>79</sup>     | Low risk of bias    | High risk of bias     | Low risk of bias              | Low risk of bias    | Low risk of bias      | Low risk of bias                   | Low      |
| Doran et al., 2002 <sup>35</sup>     | Low risk of bias    | High risk of bias     | Low risk of bias              | Low risk of bias    | Low risk of bias      | Low risk of bias                   | Low      |
| Humphreys et al., 2017 <sup>82</sup> | Low risk of bias    | Moderate risk of bias | Low risk of bias              | Low risk of bias    | Moderate risk of bias | Low risk of bias                   | Moderate |
| Kim et al., 2008 <sup>77</sup>       | Low risk of bias    | High risk of bias     | Low risk of bias              | Low risk of bias    | Low risk of bias      | Low risk of bias                   | Low      |
| Lu et al., 2014 <sup>26</sup>        | Low risk of bias    | High risk of bias     | Low risk of bias              | Low risk of bias    | Low risk of bias      | Low risk of bias                   | Low      |
| Nissen et al., 2010 <sup>78</sup>    | Low risk of bias    | High risk of bias     | Low risk of bias              | Low risk of bias    | Low risk of bias      | Low risk of bias                   | Low      |
| Sageloli et al., 2018 <sup>83</sup>  | Low risk of bias    | Low risk of bias      | Low risk of bias              | Low risk of bias    | Low risk of bias      | Low risk of bias                   | High     |

## Supplementary table 31 – Systemic lupus erythematosus and alcohol: evidence from individual studies

| Author                            | Exposure detail                                                                                                                                                                                             | Study design             | Inclusion criteria                                                                                                                                                                        | Outcomes                                                                                                          | Adjustment variables | Nb participants | Follow-up length                             | Age                                             | Gender    | Key findings                                                                                                                                                                                                                                                                                                                       |
|-----------------------------------|-------------------------------------------------------------------------------------------------------------------------------------------------------------------------------------------------------------|--------------------------|-------------------------------------------------------------------------------------------------------------------------------------------------------------------------------------------|-------------------------------------------------------------------------------------------------------------------|----------------------|-----------------|----------------------------------------------|-------------------------------------------------|-----------|------------------------------------------------------------------------------------------------------------------------------------------------------------------------------------------------------------------------------------------------------------------------------------------------------------------------------------|
| Jonsen et al., 2007 <sup>76</sup> | Alcohol intake<br>3 groups: 1) patients with an intake of 15 g alcohol per month, 2) patients with an intake of 15 g per month but 150 g per week, and 3) patients with an intake of 150 g alcohol per week | Prospective cohort study | Patients with at least four ACR classification criteria for SLE - clinical diagnosis of SLE, with at least two manifestations characteristic of SLE together with anti-nuclear antibodies | Cerebrovascular, cardiovascular and peripheral arterial organ damage (SLICC/ACR-DI), susceptibility to infections | -                    | 138             | Median follow-up time: 14 years (range 0–40) | Median age at diagnosis: 40 years (range 10–83) | 121 women | Alcohol intake > 15 g/month: inversely correlated to development of cerebrovascular, cardiovascular and peripheral arterial organ damage (CPAD), p=0.007<br>Significant association between presence of CPAD and alcohol intake > 15 g/month: OR= 0.29 (0.096–0.870)<br>No association between severe infection and alcohol intake |

**Supplementary table 32 – Systemic lupus erythematosus and alcohol: methodological quality of individual studies**

| Authors                           | Study participation | Study attrition | Prognostic factor measurement | Outcome measurement | Study confounding | Statistical analysis and reporting | Quality  |
|-----------------------------------|---------------------|-----------------|-------------------------------|---------------------|-------------------|------------------------------------|----------|
| Jonsen et al., 2007 <sup>76</sup> | Low                 | Moderate        | Low                           | Low                 | Low               | Low                                | Moderate |

## Supplementary table 33 – Gout and alcohol: evidence from individual studies

| Author                                      | Exposure detail       | Study design                             | Inclusion criteria                                                                                                            | Outcomes                                                                                                                                                                                                                                                                                   | Adjustment variables | Nb participants | Follow-up length | Age                   | Gender                  | Key findings                                                                                                                                                                                                                                                                                                                                        |
|---------------------------------------------|-----------------------|------------------------------------------|-------------------------------------------------------------------------------------------------------------------------------|--------------------------------------------------------------------------------------------------------------------------------------------------------------------------------------------------------------------------------------------------------------------------------------------|----------------------|-----------------|------------------|-----------------------|-------------------------|-----------------------------------------------------------------------------------------------------------------------------------------------------------------------------------------------------------------------------------------------------------------------------------------------------------------------------------------------------|
| Alvarez-Nemegyei et al., 2005 <sup>73</sup> | history of alcoholism | Observational study (prospective cohort) | Primary gout based on Wallace criteria<br>Exclusions:<br>secondary gout, no classification of renal failure on MSK disability | MSK physical disability defined as either ACR functional class >2 or >0.5 on HAQ<br>Renal failure was defined as moderately or severely diminished glomerular filtration rate (GFR; < 60 ml/min/1.73 m <sup>2</sup> ), based on the National Kidney Foundation criteria <sup>19,20</sup> . | -                    | 90              | unclear          | 54 (12)               | 2 (2.2%) female         | <u>alcoholism, N(%)</u><br>41/42 patients with MSK disability had history of alcoholism, whereas 44/48 patients with no MSK disability had history of alcoholism p=0.22<br><u>Renal failure, N(%)</u><br>24/25 patients with renal failure had history of alcoholism, whereas 52/55 patients without renal failure had history of alcoholism p=0.78 |
| Hanvivadhanakul et al., 2015 <sup>81</sup>  | Alcohol intake        | Retrospective case note review           | -ICD10 code M10.0                                                                                                             | Achieved American College of Rheumatology recommended uric acid concentration within 6 months                                                                                                                                                                                              | -                    | 139             | 6 months         | Mean (SD): 61 (13.06) | Men: N (%)<br>108 (77%) | Number (%) of alcohol consumers in the responders/no response groups:<br>Responders: 0 (0)<br>No response: 12 (12.9), p=0.015                                                                                                                                                                                                                       |



|                                  |                                                                                                                                                                                                                                                                                                                                                                                                                                                                                                                                                                                                                                                                                                                                                                                                                                                                                              |                          |                                                                                                                                                                                                                |              |                                                                                                                                              |     |        |                             |                        |                                                                                                                                                                                                                                                                                                                                                                                                                                                                                                                                                                                                                                                                                                                                                                                         |
|----------------------------------|----------------------------------------------------------------------------------------------------------------------------------------------------------------------------------------------------------------------------------------------------------------------------------------------------------------------------------------------------------------------------------------------------------------------------------------------------------------------------------------------------------------------------------------------------------------------------------------------------------------------------------------------------------------------------------------------------------------------------------------------------------------------------------------------------------------------------------------------------------------------------------------------|--------------------------|----------------------------------------------------------------------------------------------------------------------------------------------------------------------------------------------------------------|--------------|----------------------------------------------------------------------------------------------------------------------------------------------|-----|--------|-----------------------------|------------------------|-----------------------------------------------------------------------------------------------------------------------------------------------------------------------------------------------------------------------------------------------------------------------------------------------------------------------------------------------------------------------------------------------------------------------------------------------------------------------------------------------------------------------------------------------------------------------------------------------------------------------------------------------------------------------------------------------------------------------------------------------------------------------------------------|
| Neogi et al., 2014 <sup>80</sup> | Alcohol intake over the prior 24 hours and type of alcoholic beverage<br>Alcohol intake included the number of servings of wine, beer (including light beer, ciders, and malt beverages), or liquor (either straight or in a mixed drink) consumed during the prior 24-hour period for control and hazard periods.<br>Total amount of alcohol intake (grams/day) estimated based on number of servings reported in a 24-hour period<br>Total amount of alcohol consumption: seven categories: no alcohol consumption, >0–1 drink, >1–2, >2–4, >4–6, >6–8, and more than 8 drinks. Moderate alcohol intake is considered to be no more than 2 drinks per day for men and no more than 1 drink per day for women. <sup>22</sup> We grouped the daily consumption of each specific alcoholic beverage into the following categories based on their distribution: for wine, no wine consumption, | Prospective cohort study | -reported gout attack within the previous year<br>-age 18 years or older<br>-residents of the US<br>-informed consent<br>- American College of Rheumatology (ACR) Preliminary Classification Criteria for Gout | Gout attacks | diuretic use, purine intake, gout-related medication use (allopurinol, colchicine, NSAIDs, other urate-lowering therapies), and water intake | 724 | 1 year | Mean (SD): 54.5 (12.5) year | Male: N (%) 568 (78.5) | Having up to one drink in a 24-hour period (vs no alcohol intake): OR=1.13 (0.80-1.58)<br>Consuming >1-2 drinks in a 24-hour period (vs no alcohol intake) : OR=1.36 (1.00-1.88)<br>Moderate alcohol consumption (i.e., up to 2 drinks/day for men and up to 1 drink/day for women) (vs any alcohol in the prior 24-hour period):<br>Men: OR=1.41 (1.00–2.01)<br>Women: OR=1.06 (0.49–2.30)<br><br>Each type of alcoholic beverage intake associated with an increased risk of recurrent gout attacks<br>Consuming 0–1 servings of wine over the prior 24 hours:<br>OR= 1.25 (0.87-1.80)<br>> 1–2<br>OR= 2.38 (1.57-3.62)<br>> 2<br>OR= 1.41 (0.86–2.32)<br>Consuming > 0–2 servings of beer over the prior 24 hours:<br>OR= 1.29 (0.91-1.83)<br>> 2–4<br>OR= 1.75 (1.19-2.59)<br>> 4–6 |
|----------------------------------|----------------------------------------------------------------------------------------------------------------------------------------------------------------------------------------------------------------------------------------------------------------------------------------------------------------------------------------------------------------------------------------------------------------------------------------------------------------------------------------------------------------------------------------------------------------------------------------------------------------------------------------------------------------------------------------------------------------------------------------------------------------------------------------------------------------------------------------------------------------------------------------------|--------------------------|----------------------------------------------------------------------------------------------------------------------------------------------------------------------------------------------------------------|--------------|----------------------------------------------------------------------------------------------------------------------------------------------|-----|--------|-----------------------------|------------------------|-----------------------------------------------------------------------------------------------------------------------------------------------------------------------------------------------------------------------------------------------------------------------------------------------------------------------------------------------------------------------------------------------------------------------------------------------------------------------------------------------------------------------------------------------------------------------------------------------------------------------------------------------------------------------------------------------------------------------------------------------------------------------------------------|

|                                       |                                                                                                            |                            |                                                                                                                                                  |                                                           |   |     |                                                                                                                                         |                                                                                                                          |                                                                                                                                                                                                                                               |                                                                                                                                                                                                                                                                       |
|---------------------------------------|------------------------------------------------------------------------------------------------------------|----------------------------|--------------------------------------------------------------------------------------------------------------------------------------------------|-----------------------------------------------------------|---|-----|-----------------------------------------------------------------------------------------------------------------------------------------|--------------------------------------------------------------------------------------------------------------------------|-----------------------------------------------------------------------------------------------------------------------------------------------------------------------------------------------------------------------------------------------|-----------------------------------------------------------------------------------------------------------------------------------------------------------------------------------------------------------------------------------------------------------------------|
|                                       | >0-1, >1-2, and >2 servings; for beer and for liquor, no consumption, >0-2, >2-4, >4-6, and >6 servings.   |                            |                                                                                                                                                  |                                                           |   |     |                                                                                                                                         |                                                                                                                          | OR= 2.60 (1.40-4.81)<br>> 6<br>OR= 2.32 (1.25-4.31)<br>Consuming > 0-2 servings of hard liquor over the prior 24 hours: OR= 0.92 (0.62-1.37)<br>> 2-4<br>OR= 1.67 (1.00-2.78)<br>> 4-6<br>OR= 1.56 (0.95-2.57)<br>> 6<br>OR= 2.79 (1.26-6.16) |                                                                                                                                                                                                                                                                       |
| Su et al., 2008 <sup>74</sup>         | Tobacco use                                                                                                | Retrospective cohort study | -male primary gout subjects<br>-meet criteria for clinically defined gout                                                                        | Renal function deterioration (based on creatinine levels) | - | 318 | Subjects with renal function deterioration: 81.20 (53.29) months<br>Subjects without renal function deterioration: 92.41 (46.72) months | Subjects with renal function deterioration: 57.21 (13.02)<br>Subjects without renal function deterioration: 62.5 (14.98) | 318 men                                                                                                                                                                                                                                       | Association between alcohol consumption & deterioration of renal function: p= 0.17 (univariate analysis)                                                                                                                                                              |
| Vandenberg et al., 1994 <sup>75</sup> | Current chronic alcoholics, alcoholics who stated they had abstained for 2 years or longer, non alcoholics | Prospective cohort study   | All consultations for acute gouty arthritis received by the Rheumatology section at MacGuire VA Medical Center for March 1990, through July 1991 | Levels of serum urate during acute gout flares            | - | 53  | 2 years                                                                                                                                 | Chronic alcoholics: 61.9<br>Reformed alcoholics: 68.28<br>Non-alcoholics: 67.3                                           | NA                                                                                                                                                                                                                                            | Levels of serum urate during attack were significantly lower in patients with chronic alcoholism compared with non-alcoholic patients (p<0.015)<br>Chronic alcoholics : 7.7 ± 1.3 mg/dL<br>Reformed alcoholics : 8.7 ± 1.4 mg/dL<br>Non-alcoholics : 10.1 ± 1.3 mg/dL |

**Supplementary table 34 – Gout and alcohol: methodological quality of individual studies**

| Authors                                     | Study participation   | Study attrition   | Prognostic factor measurement | Outcome measurement | Study confounding     | Statistical analysis and reporting | Quality |
|---------------------------------------------|-----------------------|-------------------|-------------------------------|---------------------|-----------------------|------------------------------------|---------|
| Alvarez-Nemegyei et al., 2005 <sup>73</sup> | Moderate risk of bias | High risk of bias | Low risk of bias              | Low risk of bias    | Moderate risk of bias | Low risk of bias                   | Low     |
| Hanvivadhanakul et al., 2015 <sup>81</sup>  | Low risk of bias      | Low risk of bias  | Low risk of bias              | Low risk of bias    | High risk of bias     | Low risk of bias                   | Low     |
| Neogi et al., 2014 <sup>80</sup>            | Low risk of bias      | High risk of bias | Low risk of bias              | Low risk of bias    | Low risk of bias      | Low risk of bias                   | Low     |
| Su et al., 2008 <sup>74</sup>               | Low risk of bias      | High risk of bias | Low risk of bias              | Low risk of bias    | Moderate risk of bias | Low risk of bias                   | Low     |
| Vandenberg et al., 1994 <sup>75</sup>       | Low risk of bias      | Low risk of bias  | Low risk of bias              | Low risk of bias    | High risk of bias     | Low risk of bias                   | Low     |

**Supplementary table 35 – PRISMA 2020 Checklist**

| Section and Topic             | Item # | Checklist item                                                                                                                                                                                                                                                                                       | Location where item is reported |
|-------------------------------|--------|------------------------------------------------------------------------------------------------------------------------------------------------------------------------------------------------------------------------------------------------------------------------------------------------------|---------------------------------|
| <b>TITLE</b>                  |        |                                                                                                                                                                                                                                                                                                      |                                 |
| Title                         | 1      | Identify the report as a systematic review.                                                                                                                                                                                                                                                          | 1                               |
| <b>ABSTRACT</b>               |        |                                                                                                                                                                                                                                                                                                      |                                 |
| Abstract                      | 2      | See the PRISMA 2020 for Abstracts checklist.                                                                                                                                                                                                                                                         | 4                               |
| <b>INTRODUCTION</b>           |        |                                                                                                                                                                                                                                                                                                      |                                 |
| Rationale                     | 3      | Describe the rationale for the review in the context of existing knowledge.                                                                                                                                                                                                                          | 5                               |
| Objectives                    | 4      | Provide an explicit statement of the objective(s) or question(s) the review addresses.                                                                                                                                                                                                               | 5                               |
| <b>METHODS</b>                |        |                                                                                                                                                                                                                                                                                                      |                                 |
| Eligibility criteria          | 5      | Specify the inclusion and exclusion criteria for the review and how studies were grouped for the syntheses.                                                                                                                                                                                          | 6                               |
| Information sources           | 6      | Specify all databases, registers, websites, organisations, reference lists and other sources searched or consulted to identify studies. Specify the date when each source was last searched or consulted.                                                                                            | 5-6                             |
| Search strategy               | 7      | Present the full search strategies for all databases, registers and websites, including any filters and limits used.                                                                                                                                                                                 | Tables S1-S5                    |
| Selection process             | 8      | Specify the methods used to decide whether a study met the inclusion criteria of the review, including how many reviewers screened each record and each report retrieved, whether they worked independently, and if applicable, details of automation tools used in the process.                     | 6-7                             |
| Data collection process       | 9      | Specify the methods used to collect data from reports, including how many reviewers collected data from each report, whether they worked independently, any processes for obtaining or confirming data from study investigators, and if applicable, details of automation tools used in the process. | 6-7                             |
| Data items                    | 10a    | List and define all outcomes for which data were sought. Specify whether all results that were compatible with each outcome domain in each study were sought (e.g. for all measures, time points, analyses), and if not, the methods used to decide which results to collect.                        | 6-7 + Table S5                  |
|                               | 10b    | List and define all other variables for which data were sought (e.g. participant and intervention characteristics, funding sources). Describe any assumptions made about any missing or unclear information.                                                                                         | 6-7                             |
| Study risk of bias assessment | 11     | Specify the methods used to assess risk of bias in the included studies, including details of the tool(s) used, how many reviewers assessed each study and whether they worked independently, and if applicable, details of automation tools used in the process.                                    | 6                               |
| Effect measures               | 12     | Specify for each outcome the effect measure(s) (e.g. risk ratio, mean difference) used in the synthesis or presentation of results.                                                                                                                                                                  | 7                               |
| Synthesis methods             | 13a    | Describe the processes used to decide which studies were eligible for each synthesis (e.g. tabulating the study intervention characteristics and comparing against the planned groups for each synthesis (item #5)).                                                                                 | 6-7                             |
|                               | 13b    | Describe any methods required to prepare the data for presentation or synthesis, such as handling of missing summary statistics, or data conversions.                                                                                                                                                | NA                              |
|                               | 13c    | Describe any methods used to tabulate or visually display results of individual studies and syntheses.                                                                                                                                                                                               | NA                              |
|                               | 13d    | Describe any methods used to synthesize results and provide a rationale for the choice(s). If meta-analysis was performed, describe the model(s), method(s) to identify the presence and extent of statistical heterogeneity, and software package(s) used.                                          | 6-7                             |

| Section and Topic             | Item # | Checklist item                                                                                                                                                                                                                                                                       | Location where item is reported |
|-------------------------------|--------|--------------------------------------------------------------------------------------------------------------------------------------------------------------------------------------------------------------------------------------------------------------------------------------|---------------------------------|
|                               | 13e    | Describe any methods used to explore possible causes of heterogeneity among study results (e.g. subgroup analysis, meta-regression).                                                                                                                                                 | NA                              |
|                               | 13f    | Describe any sensitivity analyses conducted to assess robustness of the synthesized results.                                                                                                                                                                                         | NA                              |
| Reporting bias assessment     | 14     | Describe any methods used to assess risk of bias due to missing results in a synthesis (arising from reporting biases).                                                                                                                                                              | NA                              |
| Certainty assessment          | 15     | Describe any methods used to assess certainty (or confidence) in the body of evidence for an outcome.                                                                                                                                                                                | 7 + table S6                    |
| <b>RESULTS</b>                |        |                                                                                                                                                                                                                                                                                      |                                 |
| Study selection               | 16a    | Describe the results of the search and selection process, from the number of records identified in the search to the number of studies included in the review, ideally using a flow diagram.                                                                                         | 7 + Fig S1-S4                   |
|                               | 16b    | Cite studies that might appear to meet the inclusion criteria, but which were excluded, and explain why they were excluded.                                                                                                                                                          | Fig S1-S4                       |
| Study characteristics         | 17     | Cite each included study and present its characteristics.                                                                                                                                                                                                                            | 7-13 + Suppl. tables            |
| Risk of bias in studies       | 18     | Present assessments of risk of bias for each included study.                                                                                                                                                                                                                         | 7-13 + Suppl. tables            |
| Results of individual studies | 19     | For all outcomes, present, for each study: (a) summary statistics for each group (where appropriate) and (b) an effect estimate and its precision (e.g. confidence/credible interval), ideally using structured tables or plots.                                                     | 7-13 + Suppl. tables            |
| Results of syntheses          | 20a    | For each synthesis, briefly summarise the characteristics and risk of bias among contributing studies.                                                                                                                                                                               | 7-13                            |
|                               | 20b    | Present results of all statistical syntheses conducted. If meta-analysis was done, present for each the summary estimate and its precision (e.g. confidence/credible interval) and measures of statistical heterogeneity. If comparing groups, describe the direction of the effect. | NA                              |
|                               | 20c    | Present results of all investigations of possible causes of heterogeneity among study results.                                                                                                                                                                                       | NA                              |
|                               | 20d    | Present results of all sensitivity analyses conducted to assess the robustness of the synthesized results.                                                                                                                                                                           | NA                              |
| Reporting biases              | 21     | Present assessments of risk of bias due to missing results (arising from reporting biases) for each synthesis assessed.                                                                                                                                                              | NA                              |
| Certainty of evidence         | 22     | Present assessments of certainty (or confidence) in the body of evidence for each outcome assessed.                                                                                                                                                                                  | 7-13 + Suppl. tables            |
| <b>DISCUSSION</b>             |        |                                                                                                                                                                                                                                                                                      |                                 |
| Discussion                    | 23a    | Provide a general interpretation of the results in the context of other evidence.                                                                                                                                                                                                    | 13-15                           |
|                               | 23b    | Discuss any limitations of the evidence included in the review.                                                                                                                                                                                                                      | 14-15                           |
|                               | 23c    | Discuss any limitations of the review processes used.                                                                                                                                                                                                                                | 14-15                           |
|                               | 23d    | Discuss implications of the results for practice, policy, and future research.                                                                                                                                                                                                       | 14-15                           |
| <b>OTHER INFORMATION</b>      |        |                                                                                                                                                                                                                                                                                      |                                 |
| Registration and              | 24a    | Provide registration information for the review, including register name and registration number, or state that the review was not registered.                                                                                                                                       | NA                              |

| Section and Topic                              | Item # | Checklist item                                                                                                                                                                                                                             | Location where item is reported |
|------------------------------------------------|--------|--------------------------------------------------------------------------------------------------------------------------------------------------------------------------------------------------------------------------------------------|---------------------------------|
| protocol                                       | 24b    | Indicate where the review protocol can be accessed, or state that a protocol was not prepared.                                                                                                                                             | NA                              |
|                                                | 24c    | Describe and explain any amendments to information provided at registration or in the protocol.                                                                                                                                            | NA                              |
| Support                                        | 25     | Describe sources of financial or non-financial support for the review, and the role of the funders or sponsors in the review.                                                                                                              | 16                              |
| Competing interests                            | 26     | Declare any competing interests of review authors.                                                                                                                                                                                         | 16                              |
| Availability of data, code and other materials | 27     | Report which of the following are publicly available and where they can be found: template data collection forms; data extracted from included studies; data used for all analyses; analytic code; any other materials used in the review. | NA                              |

From: Page MJ, McKenzie JE, Bossuyt PM, Boutron I, Hoffmann TC, Mulrow CD, et al. The PRISMA 2020 statement: an updated guideline for reporting systematic reviews. *BMJ* 2021;372:n71. doi: 10.1136/bmj.n71

## References

1. Pearce F, Hui M, Ding C, Doherty M, Zhang W. Does smoking reduce the progression of osteoarthritis? Meta-analysis of observational studies. *Arthritis Care Res (Hoboken)*. 2013;65(7):1026-1033.
2. de Rooij M, van der Leeden M, Heymans MW, et al. Prognosis of Pain and Physical Functioning in Patients With Knee Osteoarthritis: A Systematic Review and Meta-Analysis. *Arthritis Care Res (Hoboken)*. 2016;68(4):481-492.
3. Bastick AN, Belo JN, Runhaar J, Bierma-Zeinstra SMA. What Are the Prognostic Factors for Radiographic Progression of Knee Osteoarthritis? A Meta-analysis. *Clin Orthop Relat Res*. 2015;473(9):2969-2989.
4. Amin S, Niu J, Guermazi A, et al. Cigarette smoking and the risk for cartilage loss and knee pain in men with knee osteoarthritis. *Annals of the rheumatic diseases*. 2007;66(1):18-22.
5. Kalichman L, Kobylansky E, Seibel MJ, Livshits G. Repeated measurement study of hand osteoarthritis in an apparently healthy Caucasian population. *Am J Hum Biol*. 2005;17(5):611-621.
6. Nishimura A, Hasegawa M, Kato K, Yamada T, Uchida A, Sudo A. Risk factors for the incidence and progression of radiographic osteoarthritis of the knee among Japanese. *Int Orthop*. 2011;35(6):839-843.
7. Baghdadi LR, Woodman RJ, Shanahan EM, Mangoni AA. The Impact of Traditional Cardiovascular Risk Factors on Cardiovascular Outcomes in Patients with Rheumatoid Arthritis: A Systematic Review and Meta-Analysis. *PLOS ONE*. 2015;10(2):e0117952.
8. Daien CI, Hua C, Combe B, Landewe R. Non-pharmacological and pharmacological interventions in patients with early arthritis: a systematic literature review informing the 2016 update of EULAR recommendations for the management of early arthritis. *RMD Open*. 2017;3(1):e000404.
9. Andersson ML, Bergman S, Söderlin MK. The Effect of Stopping Smoking on Disease Activity in Rheumatoid Arthritis (RA). Data from BARFOT, a Multicenter Study of Early RA. *The open rheumatology journal*. 2012;6:303-309.
10. Andersson MLE, Forslind K, Hafström I. Patients with Early Rheumatoid Arthritis in the 2000s Have Equal Disability and Pain Despite Less Disease Activity Compared with the 1990s: Data from the BARFOT Study over 8 Years. *J Rheumatol*. 2017;44(6):723-731.
11. Bird P, Nicholls D, Barrett R, et al. Longitudinal study of clinical prognostic factors in patients with early rheumatoid arthritis: the PREDICT study. *International journal of rheumatic diseases*. 2017;20(4):460-468.
12. Manfredsdottir VF, Vikingsdottir T, Jonsson T, et al. The effects of tobacco smoking and rheumatoid factor seropositivity on disease activity and joint damage in early rheumatoid arthritis. *Rheumatology (Oxford)*. 2006;45(6):734-740.
13. McWilliams DF, Zhang W, Mansell JS, Kiely PD, Young A, Walsh DA. Predictors of change in bodily pain in early rheumatoid arthritis: an inception cohort study. *Arthritis Care Res (Hoboken)*. 2012;64(10):1505-1513.
14. Nyhäll-Wåhlin BM, Petersson IF, Nilsson JA, Jacobsson LT, Turesson C. High disease activity disability burden and smoking predict severe extra-articular manifestations in early rheumatoid arthritis. *Rheumatology (Oxford)*. 2009;48(4):416-420.
15. Papadopoulos NG, Alamanos Y, Voulgari PV, Epagelis EK, Tsifetaki N, Drosos AA. Does cigarette smoking influence disease expression, activity and severity in early rheumatoid arthritis patients? *Clinical and experimental rheumatology*. 2005;23(6):861-866.
16. Ruiz-Esquide V, Gomez-Puerta JA, Canete JD, et al. Effects of smoking on disease activity and radiographic progression in early rheumatoid arthritis. *J Rheumatol*. 2011;38(12):2536-2539.
17. Saevarsdottir S, Rezaei H, Geborek P, et al. Current smoking status is a strong predictor of radiographic progression in early rheumatoid arthritis: results from the SWEFOT trial. *Annals of the rheumatic diseases*. 2015;74(8):1509-1514.
18. Vesperini V, Lukas C, Fautrel B, Le Loet X, Rincheval N, Combe B. Association of tobacco exposure and reduction of radiographic progression in early rheumatoid arthritis: results from a French multicenter cohort. *Arthritis Care Res (Hoboken)*. 2013;65(12):1899-1906.

19. Hetland ML, Ejbjerg B, Horslev-Petersen K, et al. MRI bone oedema is the strongest predictor of subsequent radiographic progression in early rheumatoid arthritis. Results from a 2-year randomised controlled trial (CIMESTRA). *Annals of the rheumatic diseases*. 2009;68(3):384-390.
20. Levitsky A, Brismar K, Hafstrom I, et al. Obesity is a strong predictor of worse clinical outcomes and treatment responses in early rheumatoid arthritis: results from the SWEFOT trial. *RMD Open*. 2017;3(2):e000458.
21. Andersson ML, Bergman S, Söderlin MK. The effect of snuff (smokeless tobacco) on disease activity and function in rheumatoid arthritis: experiences from the Better Anti-Rheumatic FarmacOTherapy, a longitudinal multicenter study on early rheumatoid arthritis. *Journal of clinical rheumatology : practical reports on rheumatic & musculoskeletal diseases*. 2013;19(1):14-18.
22. Crowson CS, Rollefstad S, Ikdahl E, et al. Impact of risk factors associated with cardiovascular outcomes in patients with rheumatoid arthritis. *Annals of the rheumatic diseases*. 2018;77(1):48-54.
23. Finckh A, Dehler S, Costenbader KH, Gabay C. Cigarette smoking and radiographic progression in rheumatoid arthritis. *Annals of the rheumatic diseases*. 2007;66(8):1066-1071.
24. Kim SK, Choe JY. Passive Smoking is Responsible for Disease Activity in Female Patients With Rheumatoid Arthritis. *Archives of rheumatology*. 2018;33(2):143-149.
25. Kremers HM, Crowson CS, Therneau TM, Roger VL, Gabriel SE. High ten-year risk of cardiovascular disease in newly diagnosed rheumatoid arthritis patients: a population-based cohort study. *Arthritis Rheum*. 2008;58(8):2268-2274.
26. Lu B, Rho YH, Cui J, et al. Associations of smoking and alcohol consumption with disease activity and functional status in rheumatoid arthritis. *J Rheumatol*. 2014;41(1):24-30.
27. Quintana-Duque MA, Rondon-Herrera F, Calvo-Paramo E, Yunis JJ, Varela-Narino A, Iglesias-Gamarra A. The impact of smoking on disease activity, disability, and radiographic damage in rheumatoid arthritis: is cigarette protective? *Rheumatol Int*. 2017;37(12):2065-2070.
28. Soderlin MK, Bergman S, Group BS. Absent "Window of Opportunity" in smokers with short disease duration. Data from BARFOT, a multicenter study of early rheumatoid arthritis. *J Rheumatol*. 2011;38(10):2160-2168.
29. Soderlin MK, Petersson IF, Bergman S, Svensson B, group Bs. Smoking at onset of rheumatoid arthritis (RA) and its effect on disease activity and functional status: experiences from BARFOT, a long-term observational study on early RA. *Scand J Rheumatol*. 2011;40(4):249-255.
30. Westhoff G, Rau R, Zink A. Rheumatoid arthritis patients who smoke have a higher need for DMARDs and feel worse, but they do not have more joint damage than non-smokers of the same serological group. *Rheumatology (Oxford)*. 2008;47(6):849-854.
31. Gonzalez A, Maradit Kremers H, Crowson CS, et al. Do cardiovascular risk factors confer the same risk for cardiovascular outcomes in rheumatoid arthritis patients as in non-rheumatoid arthritis patients? *Annals of the rheumatic diseases*. 2008;67(1):64-69.
32. Joseph RM, Movahedi M, Dixon WG, Symmons DP. Risks of smoking and benefits of smoking cessation on hospitalisations for cardiovascular events and respiratory infection in patients with rheumatoid arthritis: a retrospective cohort study using the Clinical Practice Research Datalink. *RMD Open*. 2017;3(2):e000506.
33. Miyake K, Kusunoki M, Shinji Y, et al. Bisphosphonate increases risk of gastroduodenal ulcer in rheumatoid arthritis patients on long-term nonsteroidal antiinflammatory drug therapy. *J Gastroenterol*. 2009;44(2):113-120.
34. Baganz L, Richter A, Albrecht K, et al. Are prognostic factors adequately selected to guide treatment decisions in patients with rheumatoid arthritis? A collaborative analysis from three observational cohorts. *Seminars in arthritis and rheumatism*. 2019;48(6):976-982.
35. Doran MF, Crowson CS, Pond GR, O'Fallon WM, Gabriel SE. Predictors of infection in rheumatoid arthritis. *Arthritis Rheum*. 2002;46(9):2294-2300.
36. Mantel Ä, Holmqvist M, Nyberg F, et al. Risk factors for the rapid increase in risk of acute coronary events in patients with new-onset rheumatoid arthritis: a nested case-control study. *Arthritis & rheumatology (Hoboken, NJ)*. 2015;67(11):2845-2854.
37. McWilliams DF, Dawson O, Young A, Kiely PDW, Ferguson E, Walsh DA. Discrete Trajectories of Resolving and Persistent Pain in People With Rheumatoid Arthritis Despite Undergoing Treatment for Inflammation: Results From Three UK Cohorts. *J Pain*. 2019;20(6):716-727.



38. Nannini C, Medina-Velasquez YF, Achenbach SJ, et al. Incidence and mortality of obstructive lung disease in rheumatoid arthritis: a population-based study. *Arthritis Care Res (Hoboken)*. 2013;65(8):1243-1250.
39. Rydell E, Forslind K, Nilsson JA, Jacobsson LTH, Turesson C. Smoking, body mass index, disease activity, and the risk of rapid radiographic progression in patients with early rheumatoid arthritis. *Arthritis Res Ther*. 2018;20(1):82.
40. Kiely P, Busby AD, Nikiphorou E, et al. Is incident rheumatoid arthritis interstitial lung disease associated with methotrexate treatment? Results from a multivariate analysis in the ERAS and ERAN inception cohorts. *BMJ Open*. 2019;9(5):e028466.
41. Verstappen SM, Lunt M, Luben RN, et al. Demographic and disease-related predictors of abnormal lung function in patients with established inflammatory polyarthritis and a comparison with the general population. *Annals of the rheumatic diseases*. 2013;72(9):1517-1523.
42. Andrades C, Fuego C, Manrique-Arija S, Fernández-Nebro A. Management of cardiovascular risk in systemic lupus erythematosus: a systematic review. *Lupus*. 2017;26(13):1407-1419.
43. Montes RA, Mocarzel LO, Lanzieri PG, Lopes LM, Carvalho A, Almeida JR. Smoking and Its Association With Morbidity in Systemic Lupus Erythematosus Evaluated by the Systemic Lupus International Collaborating Clinics/American College of Rheumatology Damage Index: Preliminary Data and Systematic Review. *Arthritis & rheumatology (Hoboken, NJ)*. 2016;68(2):441-448.
44. Rodríguez Huerta MD, Trujillo-Martín MM, Rúa-Figueroa Í, Cuellar-Pompa L, Quirós-López R, Serrano-Aguilar P. Healthy lifestyle habits for patients with systemic lupus erythematosus: A systematic review. *Seminars in arthritis and rheumatism*. 2016;45(4):463-470.
45. Bengtsson C, Ohman ML, Nived O, Rantapää Dahlqvist S. Cardiovascular event in systemic lupus erythematosus in northern Sweden: incidence and predictors in a 7-year follow-up study. *Lupus*. 2012;21(4):452-459.
46. Bernatsky S, Joseph L, Boivin JF, et al. The relationship between cancer and medication exposures in systemic lupus erythematosus: a case-cohort study. *Annals of the rheumatic diseases*. 2008;67(1):74-79.
47. Bernatsky S, Ramsey-Goldman R, Petri M, et al. Smoking Is the Most Significant Modifiable Lung Cancer Risk Factor in Systemic Lupus Erythematosus. *The Journal of Rheumatology*. 2018;45(3):393.
48. Bertoli AM, Vilá LM, Alarcón GS, et al. Factors associated with arterial vascular events in PROFILE: a Multiethnic Lupus Cohort. *Lupus*. 2009;18(11):958-965.
49. Burgos PI, McGwin G, Jr., Reveille JD, Vilá LM, Alarcón GS. Factors predictive of thrombotic events in LUMINA, a multi-ethnic cohort of SLE patients (LXXII). *Rheumatology (Oxford)*. 2010;49(9):1720-1725.
50. Calvo-Alén J, Alarcón GS, Tew MB, et al. Systemic lupus erythematosus in a multiethnic US cohort: XXXIV. Deficient mannose-binding lectin exon 1 polymorphisms are associated with cerebrovascular but not with other arterial thrombotic events. *Arthritis Rheum*. 2006;54(6):1940-1945.
51. Ho KT, Ahn CW, Alarcón GS, et al. Systemic lupus erythematosus in a multiethnic cohort (LUMINA): XXVIII. Factors predictive of thrombotic events. *Rheumatology*. 2005;44(10):1303-1307.
52. Legge A, Doucette S, Hanly JG. Predictors of Organ Damage Progression and Effect on Health-related Quality of Life in Systemic Lupus Erythematosus. *J Rheumatol*. 2016;43(6):1050-1056.
53. Turchin I, Bernatsky S, Clarke AE, St-Pierre Y, Pineau CA. Cigarette smoking and cutaneous damage in systemic lupus erythematosus. *J Rheumatol*. 2009;36(12):2691-2693.
54. Enomoto N, Egashira R, Tabata K, et al. Analysis of systemic lupus erythematosus-related interstitial pneumonia: a retrospective multicentre study. *Sci Rep*. 2019;9(1):7355.
55. Rúa-Figueroa I, Lopez-Longo J, Galindo-Izquierdo M, et al. Incidence, associated factors and clinical impact of severe infections in a large, multicentric cohort of patients with systemic lupus erythematosus. *Seminars in arthritis and rheumatism*. 2017;47(1):38-45.
56. Toloza SM, Uribe AG, McGwin G, Jr., et al. Systemic lupus erythematosus in a multiethnic US cohort (LUMINA). XXIII. Baseline predictors of vascular events. *Arthritis Rheum*. 2004;50(12):3947-3957.

57. Gustafsson J, Gunnarsson I, Borjesson O, et al. Predictors of the first cardiovascular event in patients with systemic lupus erythematosus - a prospective cohort study. *Arthritis Res Ther.* 2009;11(6):R186.
58. Julian LJ, Tonner C, Yelin E, et al. Cardiovascular and disease-related predictors of depression in systemic lupus erythematosus. *Arthritis Care Res (Hoboken).* 2011;63(4):542-549.
59. Petri M, Perez-Gutthann S, Spence D, Hochberg MC. Risk factors for coronary artery disease in patients with systemic lupus erythematosus. *Am J Med.* 1992;93(5):513-519.
60. Urowitz MB, Gladman DD, Anderson NM, et al. Cardiovascular events prior to or early after diagnosis of systemic lupus erythematosus in the systemic lupus international collaborating clinics cohort. *Lupus Sci Med.* 2016;3(1):e000143.
61. Dey M, Bukhari M. Predictors of fracture risk in patients with systemic lupus erythematosus. *Lupus.* 2018;27(9):1547-1551.
62. Villaverde-García V, Cobo-Ibáñez T, Candelas-Rodríguez G, et al. The effect of smoking on clinical and structural damage in patients with axial spondyloarthritis: A systematic literature review. *Seminars in arthritis and rheumatism.* 2017;46(5):569-583.
63. Maas F, Spoorenberg A, van der Slik BPG, et al. Clinical Risk Factors for the Presence and Development of Vertebral Fractures in Patients With Ankylosing Spondylitis. *Arthritis Care Res (Hoboken).* 2017;69(5):694-702.
64. Ward MM. Predictors of the progression of functional disability in patients with ankylosing spondylitis. *J Rheumatol.* 2002;29(7):1420-1425.
65. Deminger A, Klingberg E, Geijer M, et al. A five-year prospective study of spinal radiographic progression and its predictors in men and women with ankylosing spondylitis. *Arthritis Res Ther.* 2018;20(1):162.
66. Poddubnyy D, Haibel H, Listing J, et al. Baseline radiographic damage, elevated acute-phase reactant levels, and cigarette smoking status predict spinal radiographic progression in early axial spondylarthritis. *Arthritis Rheum.* 2012;64(5):1388-1398.
67. Ward MM, Kuzis S. Risk factors for work disability in patients with ankylosing spondylitis. *J Rheumatol.* 2001;28(2):315-321.
68. Wendling D, Guillot X, Gossec L, Prati C, Saraux A, Dougados M. Remission is related to CRP and smoking in early axial spondyloarthritis. The DESIR cohort. *Joint Bone Spine.* 2017;84(4):473-476.
69. Tillett W, Jadon D, Shaddick G, et al. Smoking and delay to diagnosis are associated with poorer functional outcome in psoriatic arthritis. *Annals of the rheumatic diseases.* 2013;72(8):1358-1361.
70. Sakr L, Hudson M, Wang M, Younanian E, Baron M, Bernatsky S. Interstitial lung disease is associated with an increased risk of lung cancer in systemic sclerosis: Longitudinal data from the Canadian Scleroderma Research Group. *Journal of Scleroderma and Related Disorders.* 2018;3(3):221-227.
71. Khimdas S, Harding S, Bonner A, et al. Associations with digital ulcers in a large cohort of systemic sclerosis: results from the Canadian Scleroderma Research Group registry. *Arthritis Care Res (Hoboken).* 2011;63(1):142-149.
72. Kwakkenbos L, Sanchez TA, Turner KA, et al. The association of sociodemographic and disease variables with hand function: a Scleroderma Patient-centered Intervention Network cohort study. *Clinical and experimental rheumatology.* 2018;36 Suppl 113(4):88-94.
73. Alvarez-Nemegyei J, Cen-Pisté JC, Medina-Escobedo M, Villanueva-Jorge S. Factors associated with musculoskeletal disability and chronic renal failure in clinically diagnosed primary gout. *J Rheumatol.* 2005;32(10):1923-1927.
74. Su BY, Lai HM, Chen CJ, et al. Ischemia heart disease and greater waist circumference are risk factors of renal function deterioration in male gout patients. *Clin Rheumatol.* 2008;27(5):581-586.
75. Vandenberg MK, Moxley G, Breitbach SA, Roberts WN. Gout attacks in chronic alcoholics occur at lower serum urate levels than in nonalcoholics. *J Rheumatol.* 1994;21(4):700-704.
76. Jönsen A, Gullstrand B, Güner N, et al. Genetically determined mannan-binding lectin deficiency is of minor importance in determining susceptibility to severe infections and vascular organ damage in systemic lupus erythematosus. *Lupus.* 2007;16(4):245-253.

77. Kim SK, Park SH, Shin IH, Choe JY. Anti-cyclic citrullinated peptide antibody, smoking, alcohol consumption, and disease duration as risk factors for extraarticular manifestations in Korean patients with rheumatoid arthritis. *J Rheumatol*. 2008;35(6):995-1001.
78. Nissen MJ, Gabay C, Scherer A, Finckh A, Swiss Clinical Quality Management Project in Rheumatoid A. The effect of alcohol on radiographic progression in rheumatoid arthritis. *Arthritis Rheum*. 2010;62(5):1265-1272.
79. Davis ML, Michaud K, Sayles H, et al. Associations of alcohol use with radiographic disease progression in African Americans with recent-onset rheumatoid arthritis. *J Rheumatol*. 2013;40(9):1498-1504.
80. Neogi T, Chen C, Niu J, Chaisson C, Hunter DJ, Zhang Y. Alcohol quantity and type on risk of recurrent gout attacks: an internet-based case-crossover study. *Am J Med*. 2014;127(4):311-318.
81. Hanvivadhanakul P, Wongdet R. Outcome of Treatment in Gouty Arthritis Patients: A Retrospective Study. *Journal of the Medical Association of Thailand = Chotmaihet thangphaet*. 2015;98 Suppl 3:S46-50.
82. Humphreys JH, Warner A, Costello R, Lunt M, Verstappen SMM, Dixon WG. Quantifying the hepatotoxic risk of alcohol consumption in patients with rheumatoid arthritis taking methotrexate. *Annals of the rheumatic diseases*. 2017;76(9):1509-1514.
83. Sageloli F, Quesada JL, Fautrel B, Salliot C, Gaudin P, Baillet A. Moderate alcohol consumption is associated with increased radiological progression in women, but not in men, with early rheumatoid arthritis: results from the ESPOIR cohort (Etude et Suivi des Polyarthrites Indifferenciees Recentes). *Scand J Rheumatol*. 2018;47(6):440-446.
84. Buirs LD, Van Beers LW, Scholtes VA, Pastoors T, Sprague S, Poolman RW. Predictors of physical functioning after total hip arthroplasty: a systematic review. *BMJ Open*. 2016;6(9):e010725.
85. Nielsen SM, Zobbe K, Kristensen LE, Christensen R. Nutritional recommendations for gout: An update from clinical epidemiology. *Autoimmunity Reviews*. 2018;17(11):1090-1096.
